# Supplementary material for: Copper-catalyzed oxidative phosphonation of 3,4-dihydro-1,4-benzoxazin-2-ones
Source: Royal Society of Chemistry journal article supplement (doi:10.1039/c8qo01049h), 2018-01-01

## Supporting Information

### Copper-catalyzed oxidative phosphonation of 3,4-Dihydro-1,4-benzoxazin-2-ones

Jie Wang, Jun Li, Yuanyuan Wei, Jingya Yang, Congde Huo\*

Key Laboratory of Eco-Environment-Related Polymer Materials Ministry of Education; College of Chemistry and Chemical Engineering, Northwest Normal University, Lanzhou, Gansu 730070, China.

E-mail: [huocongde1978@hotmail.com](mailto:huocongde1978@hotmail.com)

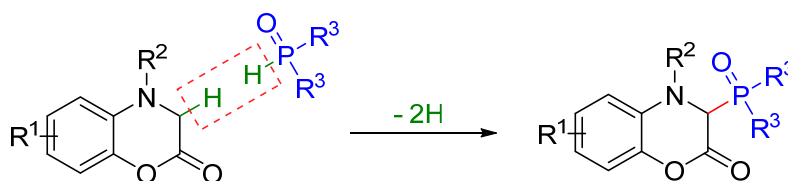

### Table of Contents

General experimental methods.....(Page 02)

Characterizations of compounds.....(Page 02)

NMR spectra of the products.....(Page 14)

## General Information.

The starting materials, reagents and solvents, purchased from commercial suppliers, were used without further purification. Analytical TLC was performed with silica gel GF254 plates, and the products were visualized by UV detection. Flash chromatography was carried out using silica gel 200–300. <sup>1</sup>H NMR (600 MHz) and <sup>13</sup>C NMR (150 MHz) spectra were measured with CDCl<sub>3</sub> as solvent. All chemical shifts (δ) are reported in ppm and coupling constants (*J*) in Hz. High resolution mass spectra (HR-MS) were recorded under electrospray ionization (ESI) conditions.

## General procedure for Copper(II)-catalyzed oxidative phosphonation of 3,4-Dihydro-1,4-benzoxazin-2-ones.

3,4-Dihydro-1,4-benzoxazin-2-one (**1**, 0.2 mmol), MeCN (2 mL), phosphonate (**2**, 0.4 mmol), Cu(OTf)<sub>2</sub> (10 mol %) and PBQ (0.2 mmol) were placed into a 10 mL reaction tube with a magnetic stirring bar. The resulting reaction mixture was stirred at 70°C. The reaction was completed within 1-6 hours as monitored by TLC, whereupon the reaction mixture was concentrated under reduced pressure (0.2 atm, 50°C), and the residue was purified by column chromatography to afford the desired compounds **3** (acetone/petroleum ether = 1:15 to 1:10).

## Characterization data for all compounds

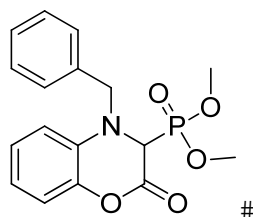

*dimethyl(4-benzyl-2-oxo-3,4-dihydro-2H-benzoxazin-3-yl)phosphonate(3aa)* The desired pure product was obtained in 69% yield (48 mg) as a white solid, mp 123-124 °C. <sup>1</sup>H NMR (600 MHz, CDCl<sub>3</sub>) δ 7.37 – 7.30 (m, 5H), 7.09 (dd, *J* = 12.3, 4.5 Hz, 2H), 6.95 – 6.88 (m, 2H), 4.74 (d, *J* = 14.0 Hz, 1H), 4.48 (dd, *J* = 14.0, 4.2 Hz, 1H), 4.41 (d, *J* = 15.7 Hz, 1H), 3.68 (d, *J* = 11.1 Hz, 3H), 3.29 (d, *J* = 11.0 Hz, 3H). <sup>13</sup>C NMR (151 MHz, CDCl<sub>3</sub>) δ 161.9, 161.9, 142.2, 135.0, 133.1, 129.0, 128.5, 128.2, 125.5, 120.6, 116.5, 114.2, 114.2, 57.9, 57.0, 53.3, 53.3, 53.1, 53.0, 52.5. <sup>31</sup>P NMR (162 MHz, CDCl<sub>3</sub>) δ 19.3. HRMS (ESI) exact mass calcd for C<sub>17</sub>H<sub>18</sub>NNaO<sub>5</sub>P [M+Na] m/z 370.0820, found 370.0815.

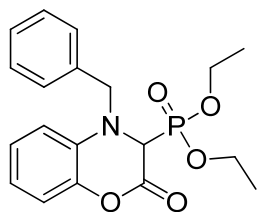

**diethyl (4-benzyl-2-oxo-3,4-dihydro-2H-benzo[b][1,4]oxazin-3-yl)phosphonate (3ab)** The desired pure product was obtained in 66% yield (50 mg) as a yellow liquid.  $^1\text{H}$  NMR (600 MHz,  $\text{CDCl}_3$ )  $\delta$  7.38 – 7.28 (m, 5H), 7.08 – 7.02 (m, 2H), 6.92 – 6.86 (m, 2H), 4.75 (d,  $J$  = 14.0 Hz, 1H), 4.51 (dd,  $J$  = 14.0, 4.0 Hz, 1H), 4.37 (d,  $J$  = 15.6 Hz, 1H), 4.11 – 3.99 (m, 2H), 3.86 – 3.79 (m, 1H), 3.58 – 3.51 (m, 1H), 1.27 (t,  $J$  = 7.1 Hz, 3H), 0.97 (t,  $J$  = 7.1 Hz, 3H).  $^{13}\text{C}$  NMR (151 MHz,  $\text{CDCl}_3$ )  $\delta$  162.0, 161.9, 142.3, 135.2, 133.2, 128.9, 128.5, 128.1, 125.4, 120.3, 116.4, 114.0, 63.4, 63.3, 62.8, 62.8, 58.3, 57.4, 52.5, 16.2, 16.2, 16.0, 16.0.  $^{31}\text{P}$  NMR (162 MHz,  $\text{CDCl}_3$ )  $\delta$  16.4. HRMS (ESI) exact mass calcd for  $\text{C}_{19}\text{H}_{22}\text{NNaO}_5\text{P}$  [ $\text{M}+\text{Na}$ ]  $m/z$  398.1133, found 398.1137.

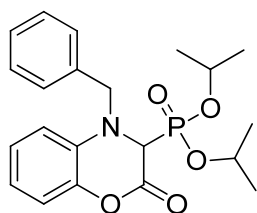

**Diisopropyl (4-benzyl-2-oxo-3,4-dihydro-2H-benzo[b][1,4]oxazin-3-yl)phosphonate(3ac)** The desired pure product was obtained in 63% yield (51 mg) as a colourless liquid.  $^1\text{H}$  NMR (600 MHz,  $\text{CDCl}_3$ )  $\delta$  7.37 – 7.28 (m, 5H), 7.05 – 7.00 (m, 2H), 6.88 – 6.83 (m, 2H), 4.75 (d,  $J$  = 14.1 Hz, 1H), 4.65 – 4.60 (m, 1H), 4.54 (dd,  $J$  = 14.1, 3.9 Hz, 1H), 4.45 – 4.39 (m, 1H), 4.28 (d,  $J$  = 15.4 Hz, 1H), 1.29 (d,  $J$  = 6.2 Hz, 3H), 1.24 (d,  $J$  = 6.2 Hz, 3H), 1.13 (d,  $J$  = 6.2 Hz, 3H), 0.82 (d,  $J$  = 6.2 Hz, 3H).  $^{13}\text{C}$  NMR (151 MHz,  $\text{CDCl}_3$ )  $\delta$  161.9, 161.9, 142.3, 135.4, 133.2, 128.9, 128.5, 128.0, 125.2, 120.0, 116.3, 113.9, 113.9, 72.5, 72.5, 72.2, 72.1, 58.9, 58.0, 52.4, 24.0, 24.0, 23.8, 23.8, 23.6, 23.6, 23.2, 23.2.  $^{31}\text{P}$  NMR (162 MHz,  $\text{CDCl}_3$ )  $\delta$  14.3. HRMS (ESI) exact mass calcd for  $\text{C}_{21}\text{H}_{26}\text{NNaO}_5\text{P}$  [ $\text{M}+\text{Na}$ ]  $m/z$  426.1446, found 426.1440.

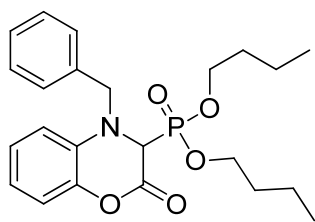

**dibutyl (4-benzyl-2-oxo-3,4-dihydro-2H-benzo[b][1,4]oxazin-3-yl)phosphonate(3ad)** The desired pure product was obtained in 59% yield (50.5 mg) as a yellow liquid.  $^1\text{H}$  NMR (400 MHz,  $\text{CDCl}_3$ )  $\delta$  7.38 – 7.31 (m, 5H), 7.10 – 7.03 (m, 2H), 6.93 – 6.86 (m, 2H), 4.76 (d,  $J = 14.0$  Hz, 1H), 4.53 (dd,  $J = 14.1$ , 4.0 Hz, 1H), 4.38 (d,  $J = 15.7$  Hz, 1H), 4.07 – 3.94 (m, 2H), 3.82 – 3.73 (m, 1H), 3.53 – 3.43 (m, 1H), 1.62 – 1.56 (m, 2H), 1.38 – 1.26 (m, 4H), 1.17 – 1.08 (m, 2H), 0.90 (t,  $J = 7.4$  Hz, 3H), 0.80 (t,  $J = 7.3$  Hz, 3H).  $^{13}\text{C}$  NMR (151 MHz,  $\text{CDCl}_3$ )  $\delta$  161.9, 161.9, 142.2, 135.2, 133.2, 128.9, 128.5, 128.1, 125.4, 120.2, 116.4, 114.0, 67.1, 67.0, 66.4, 66.3, 58.1, 57.3, 52.4, 32.3, 32.3, 32.1, 32.1, 18.5, 18.4, 13.5, 13.4.  $^{31}\text{P}$  NMR (162 MHz,  $\text{CDCl}_3$ )  $\delta$  16.6. HRMS (ESI) exact mass calcd for  $\text{C}_{23}\text{H}_{30}\text{NNaO}_5\text{P}$   $[\text{M}+\text{Na}]$   $m/z$  454.1759, found 454.1757.

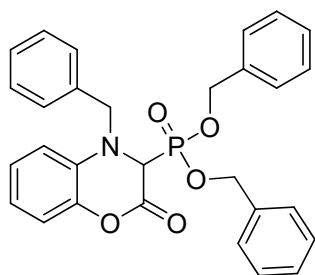

**dibenzyl(4-benzyl-2-oxo-3,4-dihydro-2H-benzo[b][1,4]oxazin-3-yl)phosphonate(3ae)** The desired pure product was obtained in 60% yield (60 mg) as a colourless liquid.  $^1\text{H}$  NMR (400 MHz,  $\text{CDCl}_3$ )  $\delta$  7.34 – 7.29 (m, 8H), 7.28 – 7.22 (m, 5H), 7.09 – 7.00 (m, 3H), 6.97 (dd,  $J = 8.0$ , 1.4 Hz, 1H), 6.93 – 6.82 (m, 2H), 4.94 – 4.84 (m, 2H), 4.76 – 4.67 (m, 2H), 4.49 – 4.42 (m, 2H), 4.36 (dd,  $J = 11.5$ , 9.9 Hz, 1H).  $^{13}\text{C}$  NMR (151 MHz,  $\text{CDCl}_3$ )  $\delta$  161.7, 142.2, 135.1, 133.0, 128.9, 128.6, 128.6, 128.5, 128.4, 128.4, 128.1, 128.1, 128.0, 127.9, 125.5, 120.5, 116.5, 114.1, 68.6, 68.5, 68.0, 68.0, 58.7, 57.8, 52.6.  $^{31}\text{P}$  NMR (162 MHz,  $\text{CDCl}_3$ )  $\delta$  17.4. HRMS (ESI) exact mass calcd for  $\text{C}_{29}\text{H}_{26}\text{NNaO}_5\text{P}$   $[\text{M}+\text{Na}]$   $m/z$  522.1446, found 522.1447.

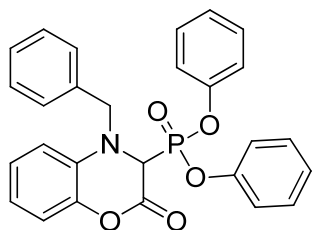

**diphenyl(4-benzyl-2-oxo-3,4-dihydro-2H-benzo[b][1,4]oxazin-3-yl)phosphonate(3af)** The desired pure product was obtained in 64% yield (60 mg) as a colouless liquid.  $^1\text{H}$  NMR (600 MHz,  $\text{CDCl}_3$ )  $\delta$  7.31 – 7.25 (m, 7H), 7.21 – 7.18 (m, 1H), 7.18 – 7.13 (m, 4H), 7.12 – 7.09 (m, 1H), 7.09 – 7.03 (m, 2H), 6.98 – 6.90 (m, 2H), 6.60 (dd,  $J = 7.6, 1.0$  Hz, 2H), 4.77 (d,  $J = 13.7$  Hz, 1H), 4.67 (d,  $J = 14.3$  Hz, 1H), 4.54 (dd,  $J = 13.7, 5.1$  Hz, 1H).  $^{13}\text{C}$  NMR (151 MHz,  $\text{CDCl}_3$ )  $\delta$  161.2, 161.2, 149.6, 149.5, 149.3, 149.2, 142.3, 134.6, 132.9, 129.9, 129.6, 128.9, 128.7, 128.2, 125.8, 125.6, 125.4, 120.8, 120.7, 120.7, 120.0, 120.0, 116.7, 114.3, 114.3, 57.6, 56.7, 52.4.  $^{31}\text{P}$  NMR (162 MHz,  $\text{CDCl}_3$ )  $\delta$  9.3. HRMS (ESI) exact mass calcd for  $\text{C}_{27}\text{H}_{22}\text{NNaO}_5\text{P}$  [ $\text{M}+\text{Na}$ ]  $m/z$  494.1133, found 494.1136.

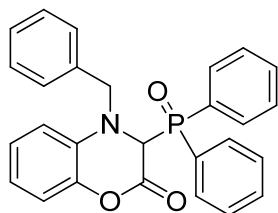

**4-benzyl-3-(diphenylphosphoryl)-3,4-dihydro-2H-benzo[b][1,4]oxazin-2-one(3ag)** The desired pure product was obtained in 73% yield (64 mg) as a white solid, mp 178-179 °C.  $^1\text{H}$  NMR (400 MHz,  $\text{CDCl}_3$ )  $\delta$  7.93 – 7.88 (m, 2H), 7.61 – 7.56 (m, 1H), 7.53 – 7.48 (m, 2H), 7.40 – 7.35 (m, 1H), 7.31 – 7.23 (m, 9H), 7.07 – 7.02 (m, 1H), 6.98 (dd,  $J = 8.1, 1.3$  Hz, 1H), 6.72 – 6.67 (m, 1H), 6.45 (dd,  $J = 8.0, 1.4$  Hz, 1H), 5.01 (d,  $J = 9.2$  Hz, 1H), 4.92 (d,  $J = 14.2$  Hz, 1H), 4.75 (dd,  $J = 14.2, 3.0$  Hz, 1H).  $^{13}\text{C}$  NMR (151 MHz,  $\text{CDCl}_3$ )  $\delta$  163.9, 163.8, 142.0, 135.4, 133.1, 132.6, 132.5, 132.1, 132.1, 131.6, 131.5, 131.2, 131.1, 130.3, 129.7, 128.9, 128.8, 128.8, 128.6, 128.2, 128.1, 128.0, 125.5, 120.4, 116.1, 114.5, 62.3, 62.0, 53.6.  $^{31}\text{P}$  NMR (162 MHz,  $\text{CDCl}_3$ )  $\delta$  30.0. HRMS (ESI) exact mass calcd for  $\text{C}_{27}\text{H}_{22}\text{NNaO}_3\text{P}$  [ $\text{M}+\text{Na}$ ]  $m/z$  462.1235, found 462.1233.

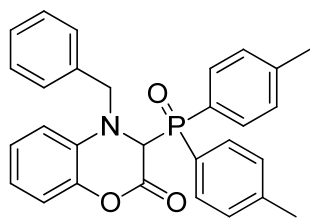

**4-benzyl-3-(di-p-tolylphosphoryl)-3,4-dihydro-2H-benzo[b][1,4]oxazin-2-one (3ah)** The desired pure product was obtained in 70% yield (66 mg) as a yellow liquid.  $^1\text{H}$  NMR (600 MHz,  $\text{CDCl}_3$ )  $\delta$  7.74 (dd,  $J = 11.4, 8.1$  Hz, 2H), 7.30 (dd,  $J = 8.1, 2.5$  Hz, 2H), 7.26 – 7.24 (m, 5H), 7.18 (dd,  $J = 11.7, 8.1$  Hz, 2H), 7.02 (dd,  $J = 7.9, 2.8$  Hz, 2H), 6.94 (d,  $J = 7.9$  Hz, 1H), 6.88 – 6.78 (m, 1H), 6.71 – 6.67 (m, 1H), 6.46 (dd,  $J = 8.0, 1.2$  Hz, 1H), 4.97 (d,  $J = 9.2$  Hz, 1H), 4.89 (d,  $J = 14.3$  Hz, 1H), 4.71 (dd,  $J = 14.3, 2.7$  Hz, 1H), 2.41 (s, 3H), 2.29 (s, 3H).  $^{13}\text{C}$  NMR (151 MHz,  $\text{CDCl}_3$ )  $\delta$  163.9, 163.8, 143.1, 142.7, 141.9, 135.6, 133.2, 131.7, 131.6, 131.2, 131.1, 129.6, 129.5, 129.0, 128.9, 128.8, 128.5, 127.9, 125.4, 120.0, 116.0, 114.4, 62.4, 62.1, 53.5, 21.7, 21.5.  $^{31}\text{P}$  NMR (162 MHz,  $\text{CDCl}_3$ )  $\delta$  30.7. HRMS (ESI) exact mass calcd for  $\text{C}_{29}\text{H}_{26}\text{NNaO}_3\text{P}$  [ $\text{M}+\text{Na}$ ]  $m/z$  490.1548, found 490.1555.

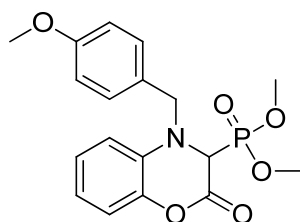

**dimethyl(4-(4-methoxybenzyl)-2-oxo-3,4-dihydro-2H-benzo[b][1,4]oxazin-3-yl)phosphonate(3ba)**

The desired pure product was obtained in 66% yield (50 mg) as a yellow liquid.  $^1\text{H}$  NMR (600 MHz,  $\text{CDCl}_3$ )  $\delta$  7.28 (d,  $J = 8.6$  Hz, 2H), 7.11 – 7.06 (m, 2H), 6.96 (d,  $J = 7.9$  Hz, 1H), 6.91 (d,  $J = 7.6$  Hz, 1H), 6.88 (d,  $J = 8.6$  Hz, 2H), 4.65 (d,  $J = 13.4$  Hz, 1H), 4.42 (d,  $J = 8.7$  Hz, 1H), 4.38 (d,  $J = 15.8$  Hz, 1H), 3.80 (s, 3H), 3.68 (d,  $J = 11.0$  Hz, 3H), 3.27 (d,  $J = 11.0$  Hz, 3H).  $^{13}\text{C}$  NMR (151 MHz,  $\text{CDCl}_3$ )  $\delta$  162.0, 162.0, 159.5, 142.2, 133.3, 130.1, 126.7, 125.5, 120.5, 116.4, 114.4, 114.1, 114.1, 57.2, 56.3, 55.3, 53.3, 53.3, 53.0, 53.0, 51.8.  $^{31}\text{P}$  NMR (162 MHz,  $\text{CDCl}_3$ )  $\delta$  19.4. HRMS (ESI) exact mass calcd for  $\text{C}_{18}\text{H}_{20}\text{NNaO}_6\text{P}$  [ $\text{M}+\text{Na}$ ]  $m/z$  400.0926, found 400.0925.

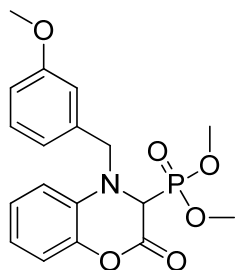

***dimethyl(4-(3-methoxybenzyl)-2-oxo-3,4-dihydro-2H-benzo[b][1,4]oxazin-3-yl)phosphonate(3ca)***

The desired pure product was obtained in 57% yield (43 mg) as a yellow liquid.  $^1\text{H}$  NMR (600 MHz,  $\text{CDCl}_3$ )  $\delta$  7.25 (dd,  $J = 9.0, 6.8$  Hz, 1H), 7.10 – 7.06 (m, 2H), 6.95 – 6.88 (m, 4H), 6.84 (dd,  $J = 8.2, 2.4$  Hz, 1H), 4.70 (d,  $J = 14.0$  Hz, 1H), 4.47 – 4.39 (m, 2H), 3.77 (s, 3H), 3.68 (d,  $J = 11.1$  Hz, 3H), 3.28 (d,  $J = 11.0$  Hz, 3H).  $^{13}\text{C}$  NMR (151 MHz,  $\text{CDCl}_3$ )  $\delta$  161.9, 161.8, 160.1, 142.2, 136.6, 136.6, 133.1, 130.0, 125.6, 120.7, 120.6, 116.5, 114.2, 114.2, 113.9, 113.7, 57.9, 57.0, 55.2, 53.4, 53.3, 53.1, 53.0, 52.5.  $^{31}\text{P}$  NMR (162 MHz,  $\text{CDCl}_3$ )  $\delta$  19.2. HRMS (ESI) exact mass calcd for  $\text{C}_{18}\text{H}_{20}\text{NNaO}_6\text{P}$  [ $\text{M}+\text{Na}$ ]  $m/z$  400.0926, found 400.0928.

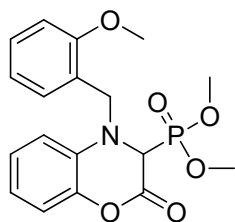

***dimethyl(4-(2-methoxybenzyl)-2-oxo-3,4-dihydro-2H-benzo[b][1,4]oxazin-3-yl)phosphonate(3da)***

The desired pure product was obtained in 64% yield (48 mg) as a yellow liquid.  $^1\text{H}$  NMR (400 MHz,  $\text{CDCl}_3$ )  $\delta$  7.29 – 7.24 (m, 2H), 7.07 – 7.00 (m, 2H), 6.96 (d,  $J = 7.5$  Hz, 1H), 6.90 – 6.81 (m, 3H), 4.78 (d,  $J = 15.0$  Hz, 1H), 4.68 (d,  $J = 16.6$  Hz, 1H), 4.42 (dd,  $J = 15.0, 2.4$  Hz, 1H), 3.80 (s, 3H), 3.74 (d,  $J = 11.0$  Hz, 3H), 3.37 (d,  $J = 10.9$  Hz, 3H).  $^{13}\text{C}$  NMR (151 MHz,  $\text{CDCl}_3$ )  $\delta$  161.7, 161.6, 157.9, 142.1, 132.3, 130.2, 129.4, 125.3, 123.5, 120.4, 119.9, 116.5, 114.7, 110.6, 59.5, 58.6, 55.3, 53.4, 53.4, 53.3, 53.3, 49.5.  $^{31}\text{P}$  NMR (162 MHz,  $\text{CDCl}_3$ )  $\delta$  19.5. HRMS (ESI) exact mass calcd for  $\text{C}_{18}\text{H}_{20}\text{NNaO}_6\text{P}$  [ $\text{M}+\text{Na}$ ]  $m/z$  400.0926, found 400.0927.

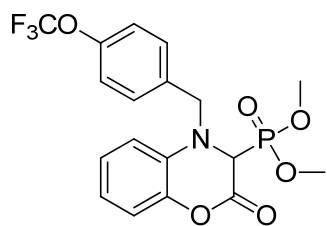

**dimethyl(2-oxo-4-(4-(trifluoromethoxy)benzyl)-3,4-dihydro-2H-benzo[b][1,4]oxazin-3-yl)phosphonate (3ea)** The desired pure product was obtained in 60% yield (52 mg) as a yellow liquid.  $^1\text{H}$  NMR (600 MHz,  $\text{CDCl}_3$ )  $\delta$  7.39 (d,  $J = 8.5$  Hz, 2H), 7.20 (d,  $J = 8.3$  Hz, 2H), 7.10 – 7.06 (m, 2H), 6.95 – 6.87 (m, 2H), 4.74 (d,  $J = 14.3$  Hz, 1H), 4.49 (dd,  $J = 14.3, 3.8$  Hz, 1H), 4.39 (d,  $J = 15.6$  Hz, 1H), 3.70 (d,  $J = 11.1$  Hz, 3H), 3.26 (d,  $J = 11.0$  Hz, 3H).  $^{13}\text{C}$  NMR (151 MHz,  $\text{CDCl}_3$ )  $\delta$  163.4, 161.8, 161.8, 161.7, 142.3, 132.9, 130.7, 130.3, 130.2, 125.6, 120.8, 116.5, 116.0, 115.8, 114.1, 57.8, 56.9, 53.4, 53.3, 53.1, 53.0, 51.8.  $^{31}\text{P}$  NMR (162 MHz,  $\text{CDCl}_3$ )  $\delta$  14.7. HRMS (ESI) exact mass calcd for  $\text{C}_{18}\text{H}_{17}\text{F}_3\text{NNaO}_6\text{P}$   $[\text{M}+\text{Na}]$   $m/z$  454.0643, found 454.0638.

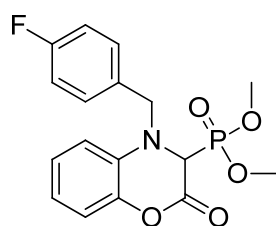

**dimethyl(4-(4-fluorobenzyl)-2-oxo-3,4-dihydro-2H-benzo[b][1,4]oxazin-3-yl)phosphonate (3fa)** The desired pure product was obtained in 64% yield (47 mg) as a colourless liquid.  $^1\text{H}$  NMR (600 MHz,  $\text{CDCl}_3$ )  $\delta$  7.34 (dd,  $J = 8.4, 5.4$  Hz, 2H), 7.10 – 7.02 (m, 4H), 6.93 – 6.89 (m, 2H), 4.70 (d,  $J = 13.9$  Hz, 1H), 4.46 (dd,  $J = 13.9, 4.1$  Hz, 1H), 4.37 (d,  $J = 15.7$  Hz, 1H), 3.69 (d,  $J = 11.1$  Hz, 3H), 3.26 (d,  $J = 11.0$  Hz, 3H).  $^{13}\text{C}$  NMR (151 MHz,  $\text{CDCl}_3$ )  $\delta$  161.7, 161.7, 149.0, 142.2, 133.8, 133.8, 132.7, 129.8, 125.6, 121.4, 120.9, 116.6, 114.1, 114.1, 58.3, 57.4, 53.4, 53.3, 53.1, 53.1, 51.8.  $^{31}\text{P}$  NMR (162 MHz,  $\text{CDCl}_3$ )  $\delta$  14.4. HRMS (ESI) exact mass calcd for  $\text{C}_{17}\text{H}_{17}\text{FNNaO}_5\text{P}$   $[\text{M}+\text{Na}]$   $m/z$  388.0726, found 388.0729.

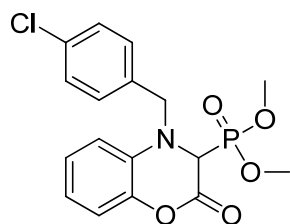



**dimethyl (4-(4-chlorobenzyl)-2-oxo-3,4-dihydro-2H-benzo[b][1,4]oxazin-3-yl)phosphonate (3ga)** The desired pure product was obtained in 65% yield (50 mg) as a colourless liquid. <sup>1</sup>H NMR (600 MHz, CDCl<sub>3</sub>) δ 7.34 – 7.28 (m, 4H), 7.10 – 7.06 (m, 2H), 6.93 – 6.87 (m, 2H), 4.70 (d, *J* = 14.2 Hz, 1H), 4.46 (dd, *J* = 14.2, 3.9 Hz, 1H), 4.38 (d, *J* = 15.6 Hz, 1H), 3.70 (d, *J* = 11.1 Hz, 3H), 3.26 (d, *J* = 11.0 Hz, 3H). <sup>13</sup>C NMR (151 MHz, CDCl<sub>3</sub>) δ 161.8, 161.7, 142.2, 134.0, 133.6, 132.8, 129.8, 129.2, 125.6, 120.8, 116.6, 114.2, 114.1, 58.1, 57.3, 53.4, 53.4, 53.1, 53.1, 52.0. <sup>31</sup>P NMR (162 MHz, CDCl<sub>3</sub>) δ 19.0. HRMS (ESI) exact mass calcd for C<sub>17</sub>H<sub>17</sub>ClNNaO<sub>5</sub>P [M+Na] m/z 404.0431, found 404.0428.

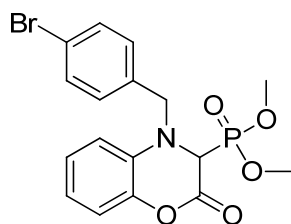

**dimethyl(4-(4-bromobenzyl)-2-oxo-3,4-dihydro-2H-benzo[b][1,4]oxazin-3-yl)phosphonate (3ha)** The desired pure product was obtained in 61% yield (52 mg) as a white solid, mp 125-126 °C. <sup>1</sup>H NMR (600 MHz, CDCl<sub>3</sub>) δ 7.47 (d, *J* = 8.3 Hz, 2H), 7.23 (d, *J* = 8.3 Hz, 2H), 7.09 – 7.05 (m, 2H), 6.94 – 6.85 (m, 2H), 4.68 (d, *J* = 14.3 Hz, 1H), 4.44 (dd, *J* = 14.3, 3.8 Hz, 1H), 4.38 (d, *J* = 15.6 Hz, 1H), 3.69 (d, *J* = 11.1 Hz, 3H), 3.26 (d, *J* = 11.0 Hz, 3H). <sup>13</sup>C NMR (151 MHz, CDCl<sub>3</sub>) δ 161.7, 161.7, 142.2, 134.2, 132.8, 132.1, 130.1, 125.6, 122.1, 120.8, 116.6, 114.2, 114.1, 58.2, 57.3, 53.4, 53.4, 53.1, 53.1, 52.0. <sup>31</sup>P NMR (162 MHz, CDCl<sub>3</sub>) δ 14.3. HRMS (ESI) exact mass calcd for C<sub>17</sub>H<sub>17</sub>BrNNaO<sub>5</sub>P [M+Na] m/z 447.9925, found 447.9933.

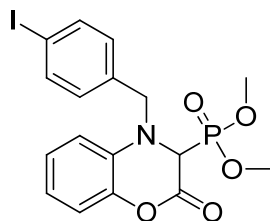

**dimethyl (4-(4-iodobenzyl)-2-oxo-3,4-dihydro-2H-benzo[b][1,4]oxazin-3-yl)phosphonate (3ia)** The desired pure product was obtained in 58% yield (55 mg) as a yellow liquid. <sup>1</sup>H NMR (600 MHz, CDCl<sub>3</sub>) δ 7.68 (d, *J* = 8.3 Hz, 2H), 7.11 – 7.06 (m, 4H), 6.92 – 6.86 (m, 2H), 4.68 (d, *J* = 14.3 Hz, 1H), 4.43 (dd, *J* = 14.3, 3.8 Hz, 1H), 4.38 (d, *J* = 15.6 Hz, 1H), 3.70 (d, *J* = 11.1 Hz, 3H), 3.26 (d, *J* = 11.1 Hz, 3H). <sup>13</sup>C NMR (151 MHz, CDCl<sub>3</sub>) δ 161.7, 142.2, 138.1, 134.9, 132.8, 130.3, 125.6, 120.8, 116.6, 114.1,

93.7, 58.3, 57.4, 53.4, 53.4, 53.1, 53.1, 52.1.  $^{31}\text{P}$  NMR (162 MHz,  $\text{CDCl}_3$ )  $\delta$  13.8. HRMS (ESI) exact mass calcd for  $\text{C}_{17}\text{H}_{17}\text{INNaO}_5\text{P}$   $[\text{M}+\text{Na}]$   $m/z$  495.9787, found 495.9793.

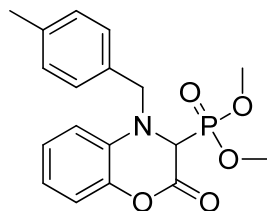

**dimethyl (4-(4-methylbenzyl)-2-oxo-3,4-dihydro-2H-benzo[b][1,4]oxazin-3-yl)phosphonate (3ja)** The desired pure product was obtained in 70% yield (50.5 mg) as a yellow liquid.  $^1\text{H}$  NMR (400 MHz,  $\text{CDCl}_3$ )  $\delta$  7.27 (d,  $J = 7.9$  Hz, 2H), 7.18 (d,  $J = 7.7$  Hz, 2H), 7.14 – 7.08 (m, 2H), 6.99 – 6.90 (m, 2H), 4.71 (d,  $J = 13.7$  Hz, 1H), 4.49 – 4.40 (m, 2H), 3.71 (d,  $J = 11.1$  Hz, 3H), 3.30 (d,  $J = 11.1$  Hz, 3H), 2.37 (s, 3H).  $^{13}\text{C}$  NMR (151 MHz,  $\text{CDCl}_3$ )  $\delta$  162.0, 161.9, 142.2, 138.0, 133.2, 131.8, 129.6, 129.5, 128.6, 125.5, 120.5, 116.4, 114.2, 114.1, 57.5, 56.7, 53.3, 53.3, 53.1, 53.0, 52.2, 21.1.  $^{31}\text{P}$  NMR (162 MHz,  $\text{CDCl}_3$ )  $\delta$  19.4. HRMS (ESI) exact mass calcd for  $\text{C}_{18}\text{H}_{20}\text{NNaO}_5\text{P}$   $[\text{M}+\text{Na}]$   $m/z$  384.0977, found 384.0971.

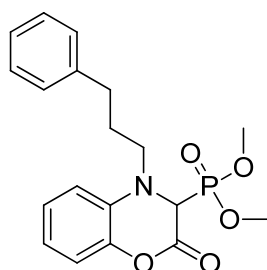

**dimethyl(2-oxo-4-(3-phenylpropyl)-3,4-dihydro-2H-benzo[b][1,4]oxazin-3-yl)phosphonate (3ka)** The desired pure product was obtained in 56% yield (42 mg) as a yellow liquid.  $^1\text{H}$  NMR (600 MHz,  $\text{CDCl}_3$ )  $\delta$  7.29 – 7.26 (m, 2H), 7.19 (dd,  $J = 7.7, 1.6$  Hz, 1H), 7.14 (d,  $J = 7.0$  Hz, 2H), 7.08 – 7.05 (m, 1H), 7.04 (dd,  $J = 8.0, 1.4$  Hz, 1H), 6.87 – 6.80 (m, 2H), 4.46 (d,  $J = 16.2$  Hz, 1H), 3.70 (d,  $J = 11.1$  Hz, 3H), 3.64 – 3.60 (m, 1H), 3.28 (d,  $J = 11.0$  Hz, 3H), 3.20 – 3.17 (m, 1H), 2.70 – 2.67 (m, 1H), 2.65 – 2.62 (m, 1H), 2.03 – 1.99 (m, 1H), 1.97 – 1.93 (m, 1H).  $^{13}\text{C}$  NMR (151 MHz,  $\text{CDCl}_3$ )  $\delta$  161.6, 142.1, 140.8, 132.3, 128.5, 128.3, 126.1, 125.5, 120.1, 116.6, 113.9, 60.0, 59.1, 53.3, 53.3, 53.2, 53.1, 48.8, 32.8, 28.1, 28.1.  $^{31}\text{P}$  NMR (162 MHz,  $\text{CDCl}_3$ )  $\delta$  19.1. HRMS (ESI) exact mass calcd for  $\text{C}_{19}\text{H}_{22}\text{NNaO}_5\text{P}$   $[\text{M}+\text{Na}]$   $m/z$  398.1133, found 398.1131.

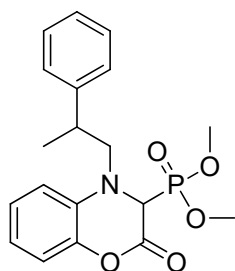

**dimethyl (2-oxo-4-(2-phenylpropyl)-3,4-dihydro-2H-benzo[b][1,4]oxazin-3-yl)phosphonate (3la)** The desired pure product was obtained in 53% yield (40 mg) as a colourless liquid.  $^1\text{H}$  NMR (600 MHz,  $\text{CDCl}_3$ )  $\delta$  7.30 – 7.26 (m, 4H), 7.23 – 7.18 (m, 4H), 7.11 – 7.07 (m, 4H), 7.01 (d,  $J = 7.9$  Hz, 2H), 6.90 – 6.82 (m, 4H), 4.50 (d,  $J = 16.4$  Hz, 1H), 3.91 – 3.85 (m, 3H), 3.71 (d,  $J = 11.0$  Hz, 3H), 3.66 (d,  $J = 11.0$  Hz, 3H), 3.31 – 3.27 (m, 6H), 3.26 – 3.22 (m, 1H), 3.17 – 3.14 (m, 1H), 3.11 – 3.05 (m, 2H), 1.30 (d,  $J = 7.1$  Hz, 6H).  $^{13}\text{C}$  NMR (151 MHz,  $\text{CDCl}_3$ )  $\delta$  161.4, 161.3, 160.5, 160.5, 143.6, 143.3, 141.9, 141.5, 132.0, 131.3, 128.8, 128.7, 127.0, 126.9, 126.8, 126.8, 125.5, 125.5, 120.0, 119.6, 116.8, 116.7, 113.7, 113.3, 60.9, 60.6, 60.0, 59.7, 57.3, 56.6, 53.4, 53.4, 53.3, 53.3, 53.2, 37.5, 37.5, 37.2, 37.2, 19.3, 17.9.  $^{31}\text{P}$  NMR (162 MHz,  $\text{CDCl}_3$ )  $\delta$  19.01, 18.64. HRMS (ESI) exact mass calcd for  $\text{C}_{19}\text{H}_{22}\text{NNaO}_5\text{P}$   $[\text{M}+\text{Na}]$   $m/z$  398.1133, found 398.1134.

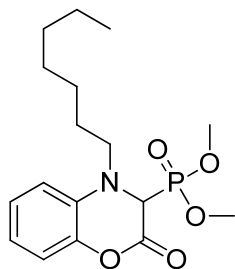

**dimethyl (4-heptyl-2-oxo-3,4-dihydro-2H-benzo[b][1,4]oxazin-3-yl)phosphonate (3ma)** The desired pure product was obtained in 56% yield (40 mg) as a colourless liquid.  $^1\text{H}$  NMR (600 MHz,  $\text{CDCl}_3$ )  $\delta$  7.09 (dd,  $J = 11.3, 4.2$  Hz, 1H), 7.03 (d,  $J = 7.9$  Hz, 1H), 6.89 – 6.83 (m, 2H), 4.55 (d,  $J = 16.4$  Hz, 1H), 3.73 (d,  $J = 11.0$  Hz, 3H), 3.60 – 3.55 (m, 1H), 3.31 (d,  $J = 11.0$  Hz, 3H), 3.22 – 3.17 (m, 1H), 1.64 – 1.57 (m, 3H), 1.32 – 1.25 (m, 7H), 0.86 (t,  $J = 6.9$  Hz, 3H).  $^{13}\text{C}$  NMR (151 MHz,  $\text{CDCl}_3$ )  $\delta$  161.6, 142.1, 132.6, 125.5, 119.9, 116.6, 113.8, 59.7, 58.8, 53.3, 53.3, 53.2, 53.1, 49.7, 31.7, 29.0, 26.8, 26.8, 22.5, 14.0.  $^{31}\text{P}$  NMR (162 MHz,  $\text{CDCl}_3$ )  $\delta$  19.2. HRMS (ESI) exact mass calcd for  $\text{C}_{17}\text{H}_{26}\text{NNaO}_5\text{P}$   $[\text{M}+\text{Na}]$   $m/z$  378.1446, found 378.1452.

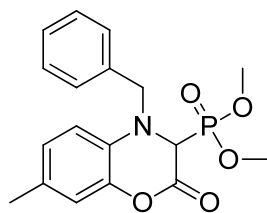

**dimethyl (4-benzyl-7-methyl-2-oxo-3,4-dihydro-2H-benzo[b][1,4]oxazin-3-yl)phosphonate (3na)** The desired pure product was obtained in 65% yield (47 mg) as a yellow liquid.  $^1\text{H}$  NMR (600 MHz,  $\text{CDCl}_3$ )  $\delta$  7.34 (d,  $J = 4.4$  Hz, 4H), 7.32 – 7.28 (m, 1H), 6.90 – 6.86 (m, 2H), 6.81 (d,  $J = 8.0$  Hz, 1H), 4.69 (d,  $J = 14.0$  Hz, 1H), 4.44 (dd,  $J = 14.0, 4.2$  Hz, 1H), 4.38 (d,  $J = 15.9$  Hz, 1H), 3.68 (d,  $J = 11.1$  Hz, 3H), 3.31 (d,  $J = 11.0$  Hz, 3H), 2.28 (s, 3H).  $^{13}\text{C}$  NMR (151 MHz,  $\text{CDCl}_3$ )  $\delta$  162.0, 162.0, 142.2, 135.3, 130.6, 130.6, 128.9, 128.5, 128.1, 125.9, 117.0, 114.2, 58.2, 57.3, 53.3, 53.2, 53.1, 53.0, 52.9, 20.5.  $^{31}\text{P}$  NMR (162 MHz,  $\text{CDCl}_3$ )  $\delta$  19.5. HRMS (ESI) exact mass calcd for  $\text{C}_{18}\text{H}_{20}\text{NNaO}_5\text{P}$  [ $\text{M}+\text{Na}$ ]  $m/z$  384.0977, found 384.0971.

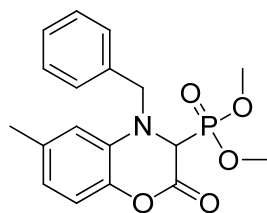

**dimethyl (4-benzyl-6-methyl-2-oxo-3,4-dihydro-2H-benzo[b][1,4]oxazin-3-yl)phosphonate(3oa)** The desired pure product was obtained in 69% yield (50 mg) as a white solid, mp 163-164 °C.  $^1\text{H}$  NMR (600 MHz,  $\text{CDCl}_3$ )  $\delta$  7.35 (d,  $J = 4.4$  Hz, 4H), 7.33 – 7.30 (m, 1H), 6.95 (d,  $J = 8.1$  Hz, 1H), 6.76 (s, 1H), 6.70 (d,  $J = 8.2$  Hz, 1H), 4.72 (d,  $J = 13.8$  Hz, 1H), 4.46 (dd,  $J = 13.8, 4.6$  Hz, 1H), 4.36 (d,  $J = 15.7$  Hz, 1H), 3.68 (d,  $J = 11.1$  Hz, 3H), 3.30 (d,  $J = 11.0$  Hz, 3H), 2.29 (s, 3H).  $^{13}\text{C}$  NMR (151 MHz,  $\text{CDCl}_3$ )  $\delta$  161.9, 140.2, 135.3, 135.1, 132.8, 128.9, 128.6, 128.2, 121.0, 116.2, 114.7, 57.6, 56.8, 53.3, 53.2, 53.1, 53.0, 52.4, 21.3.  $^{31}\text{P}$  NMR (162 MHz,  $\text{CDCl}_3$ )  $\delta$  19.6. HRMS (ESI) exact mass calcd for  $\text{C}_{18}\text{H}_{20}\text{NNaO}_5\text{P}$  [ $\text{M}+\text{Na}$ ]  $m/z$  384.0977, found 384.0975.

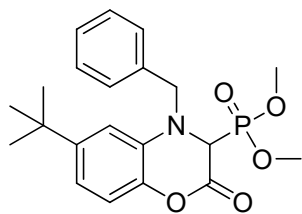

**dimethyl(4-benzyl-6-(tert-butyl)-2-oxo-3,4-dihydro-2H-benzo[b][1,4]oxazin-3-yl)phosphonate (3pa)**

The desired pure product was obtained in 62% yield (50 mg) as a yellow liquid.  $^1\text{H}$  NMR (600 MHz,  $\text{CDCl}_3$ )  $\delta$  7.38 – 7.33 (m, 4H), 7.31 – 7.29 (m, 1H), 6.98 (d,  $J = 8.3$  Hz, 1H), 6.92 – 6.89 (m, 2H), 4.76 (d,  $J = 13.9$  Hz, 1H), 4.48 (dd,  $J = 13.9, 4.1$  Hz, 1H), 4.42 (d,  $J = 15.8$  Hz, 1H), 3.67 (d,  $J = 11.1$  Hz, 3H), 3.24 (d,  $J = 11.0$  Hz, 3H), 1.24 (s, 9H).  $^{13}\text{C}$  NMR (151 MHz,  $\text{CDCl}_3$ )  $\delta$  162.0, 148.8, 140.2, 135.3, 132.3, 128.9, 128.8, 128.5, 128.1, 126.9, 117.4, 115.8, 111.6, 58.2, 57.4, 53.3, 53.2, 52.9, 52.9, 52.8, 34.7, 31.3.  $^{31}\text{P}$  NMR (162 MHz,  $\text{CDCl}_3$ )  $\delta$  19.5. HRMS (ESI) exact mass calcd for  $\text{C}_{21}\text{H}_{26}\text{NO}_5\text{P}$  [ $\text{M}+\text{Na}$ ]  $m/z$  426.1446, found 426.1450.

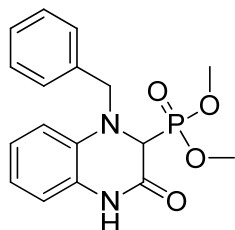

**dimethyl (1-benzyl-3-oxo-1,2,3,4-tetrahydroquinoxalin-2-yl)phosphonate (3qa)** The desired pure product was obtained in 72% yield (50 mg) as a white solid, mp 222-223 °C.  $^1\text{H}$  NMR (600 MHz,  $\text{CDCl}_3$ )  $\delta$  9.32 (s, 1H), 7.36 – 7.31 (m, 4H), 7.28 – 7.25 (m, 1H), 6.98 – 6.95 (m, 1H), 6.85 – 6.82 (m, 2H), 6.80 (d,  $J = 7.4$  Hz, 1H), 4.77 (d,  $J = 13.4$  Hz, 1H), 4.50 (dd,  $J = 14.2, 4.0$  Hz, 1H), 4.31 (d,  $J = 14.5$  Hz, 1H), 3.67 (d,  $J = 11.0$  Hz, 3H), 3.34 (d,  $J = 10.9$  Hz, 3H).  $^{13}\text{C}$  NMR (151 MHz,  $\text{CDCl}_3$ )  $\delta$  164.0, 135.8, 134.1, 128.8, 128.4, 127.9, 126.7, 124.4, 119.9, 115.6, 113.7, 60.1, 59.2, 53.0, 53.0, 52.9, 52.9.  $^{31}\text{P}$  NMR (162 MHz,  $\text{CDCl}_3$ )  $\delta$  22.0. HRMS (ESI) exact mass calcd for  $\text{C}_{17}\text{H}_{19}\text{N}_2\text{O}_4\text{P}$  [ $\text{M}+\text{Na}$ ]  $m/z$  369.0980, found 369.0975.

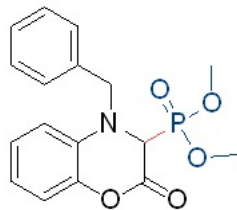

**3aa**

7.3570  
7.3510  
7.3488  
7.3388  
7.3359  
7.3345  
7.3213  
7.3162  
7.3135  
7.3106  
7.3069  
7.3023  
7.2989  
7.0977  
7.0954  
7.0824  
7.0696  
6.9441  
6.9310  
6.9141  
6.9010  
6.8883

4.7542  
4.7309  
4.4989  
4.4920  
4.4757  
4.4687  
4.4216  
4.3954

3.6935  
3.6750

3.2945  
3.2761

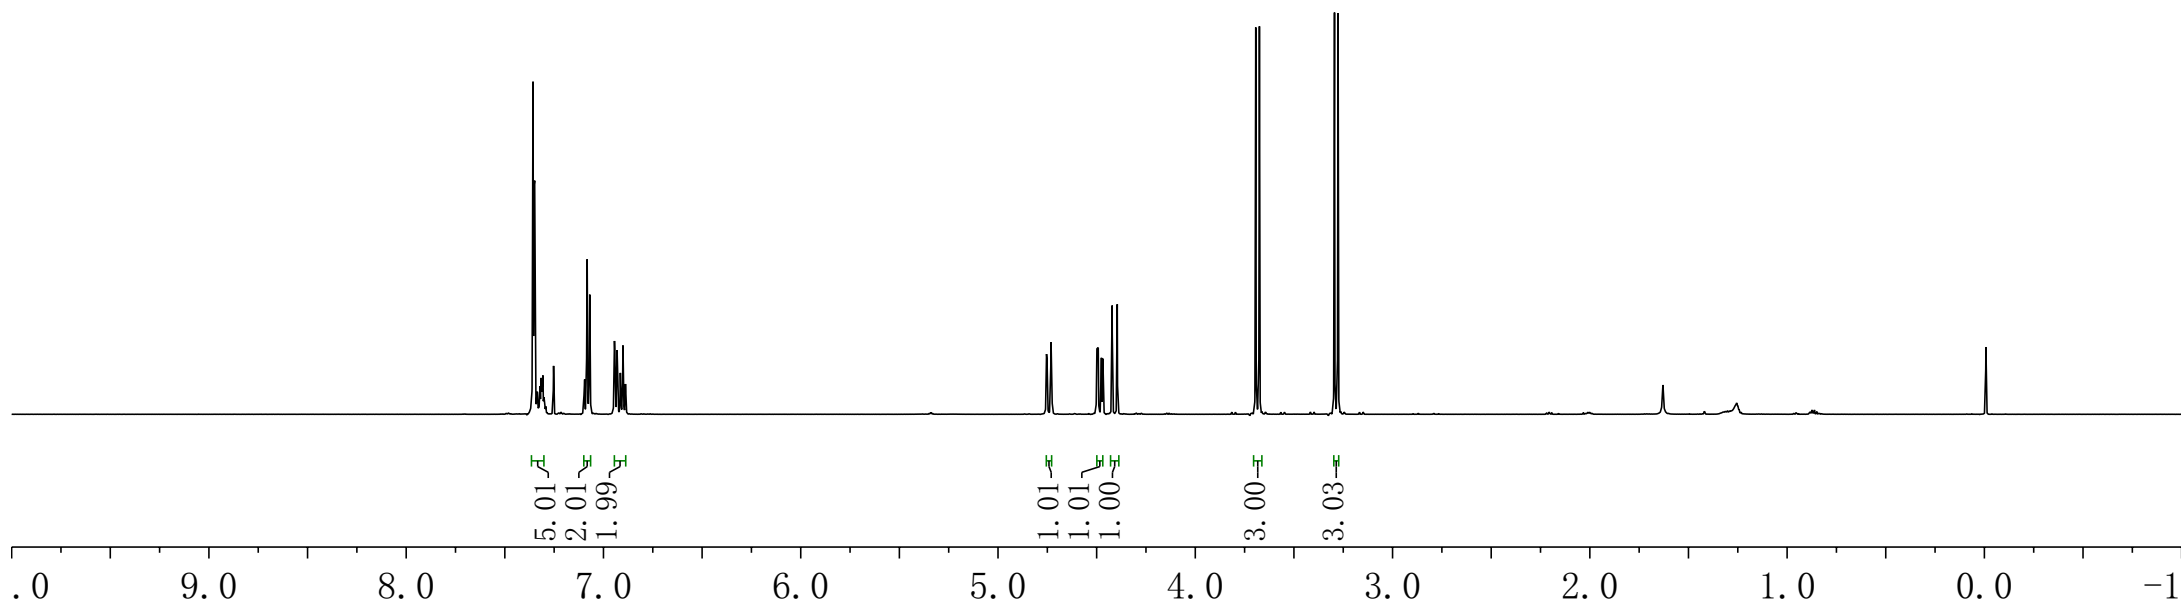

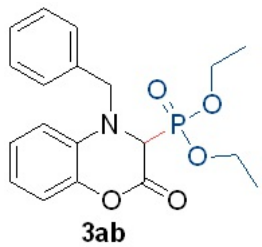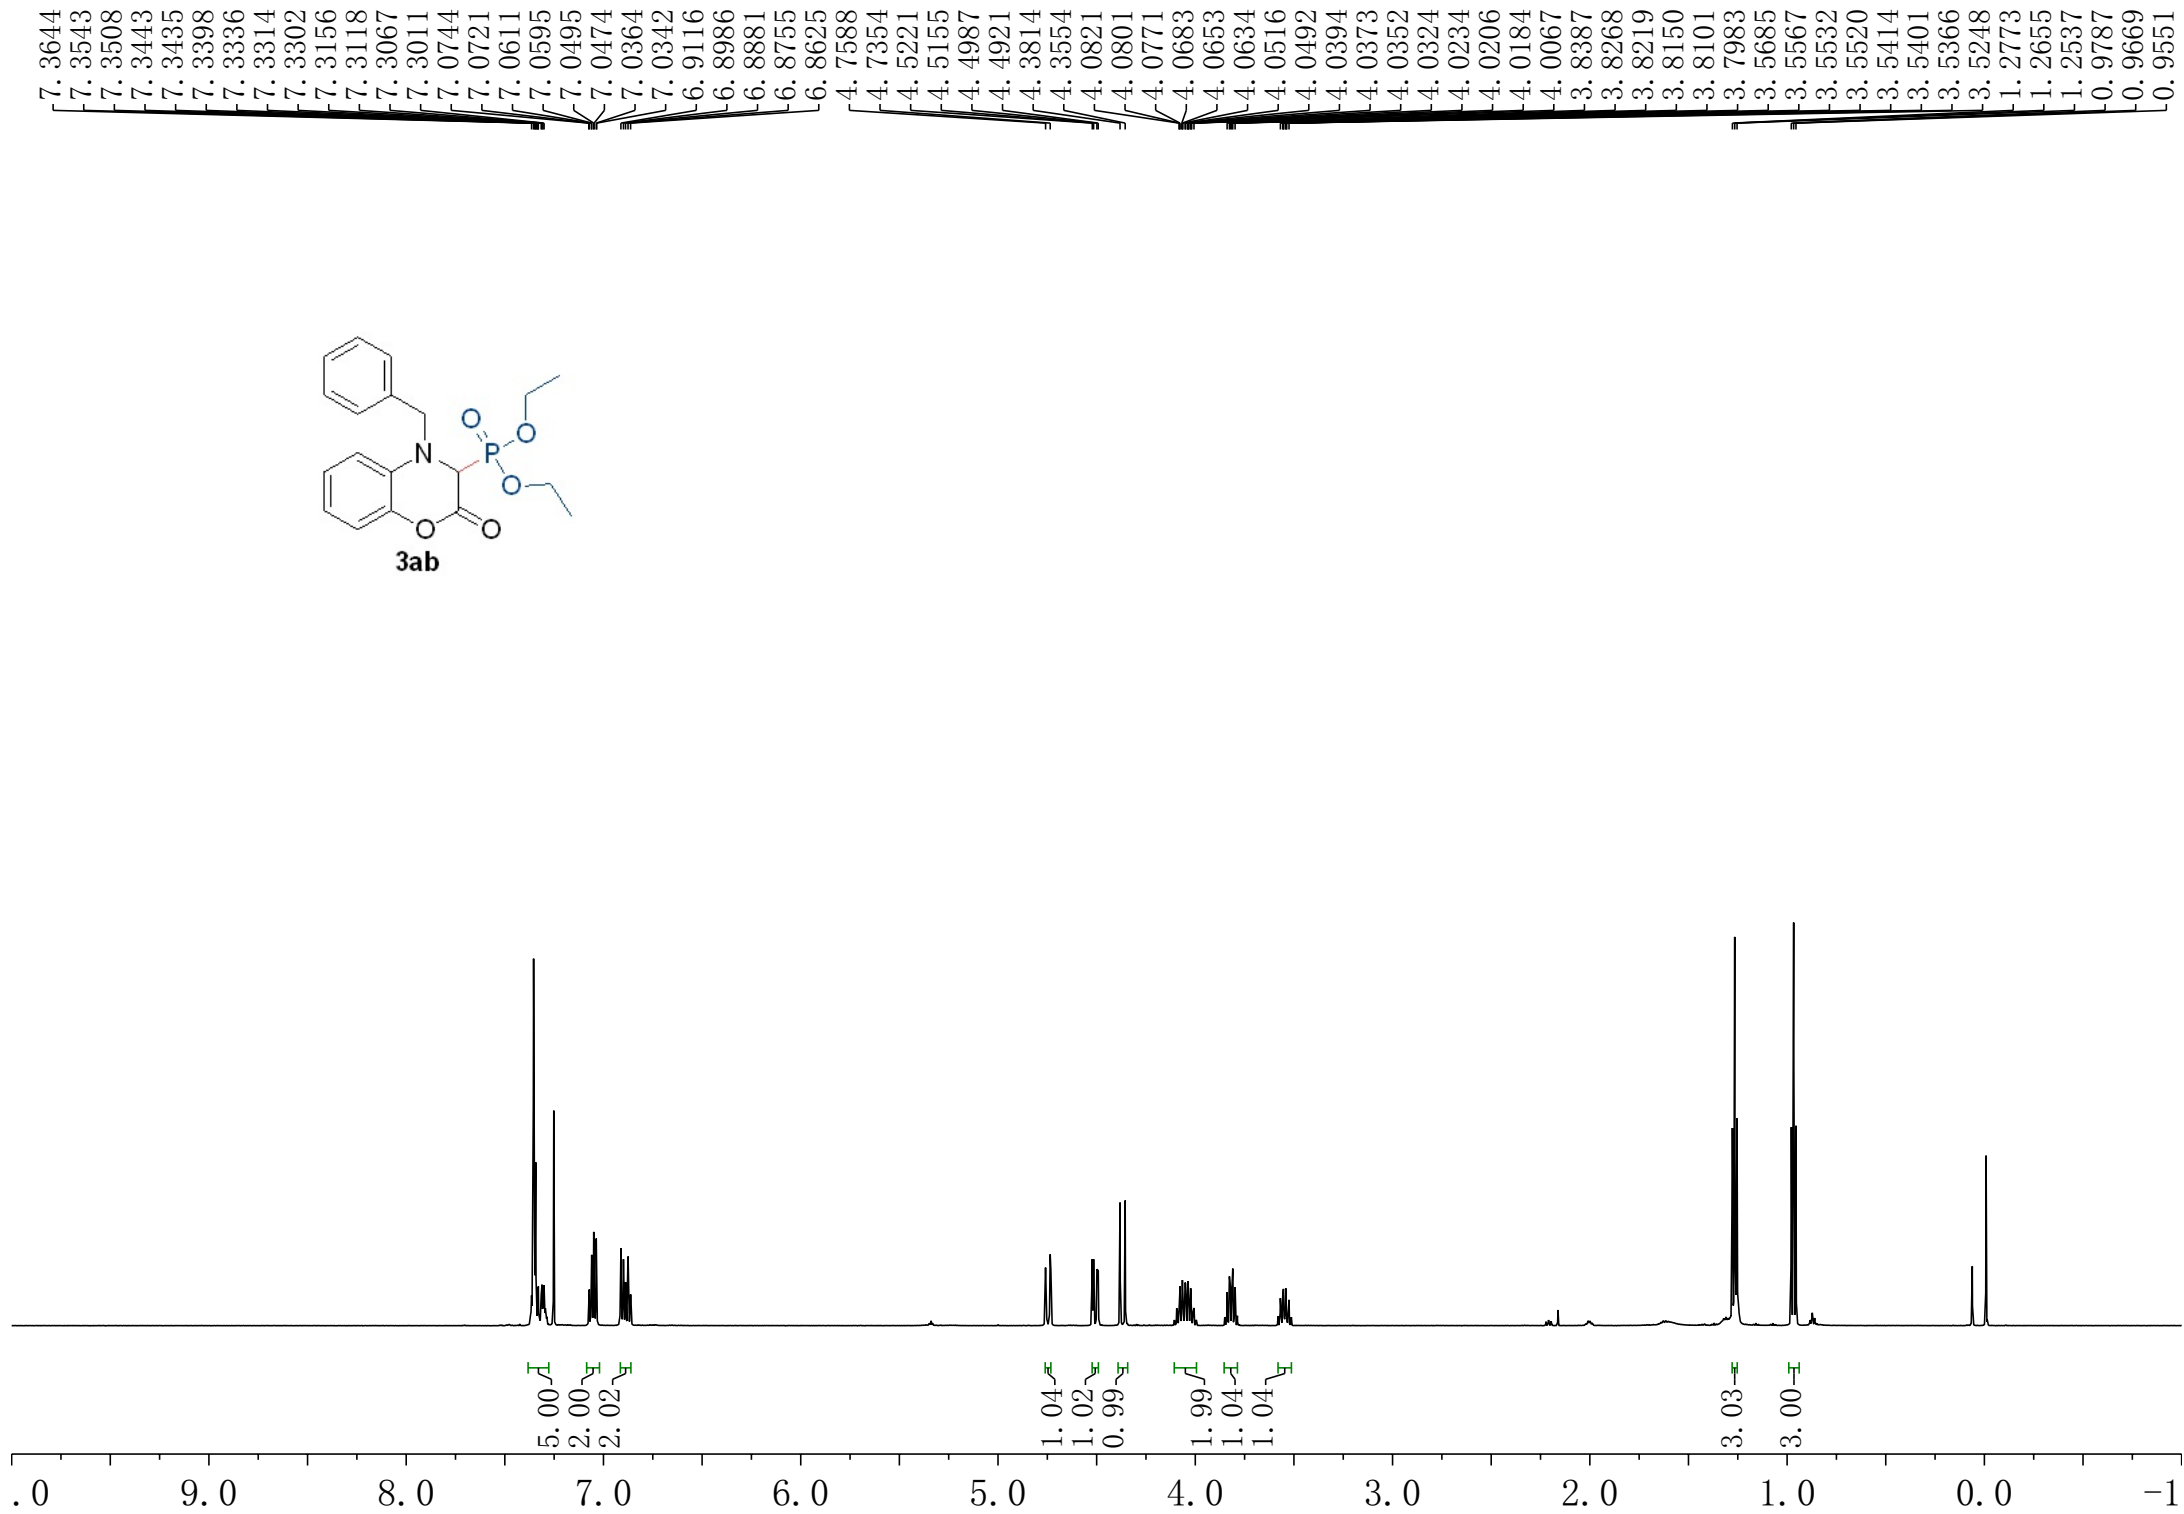

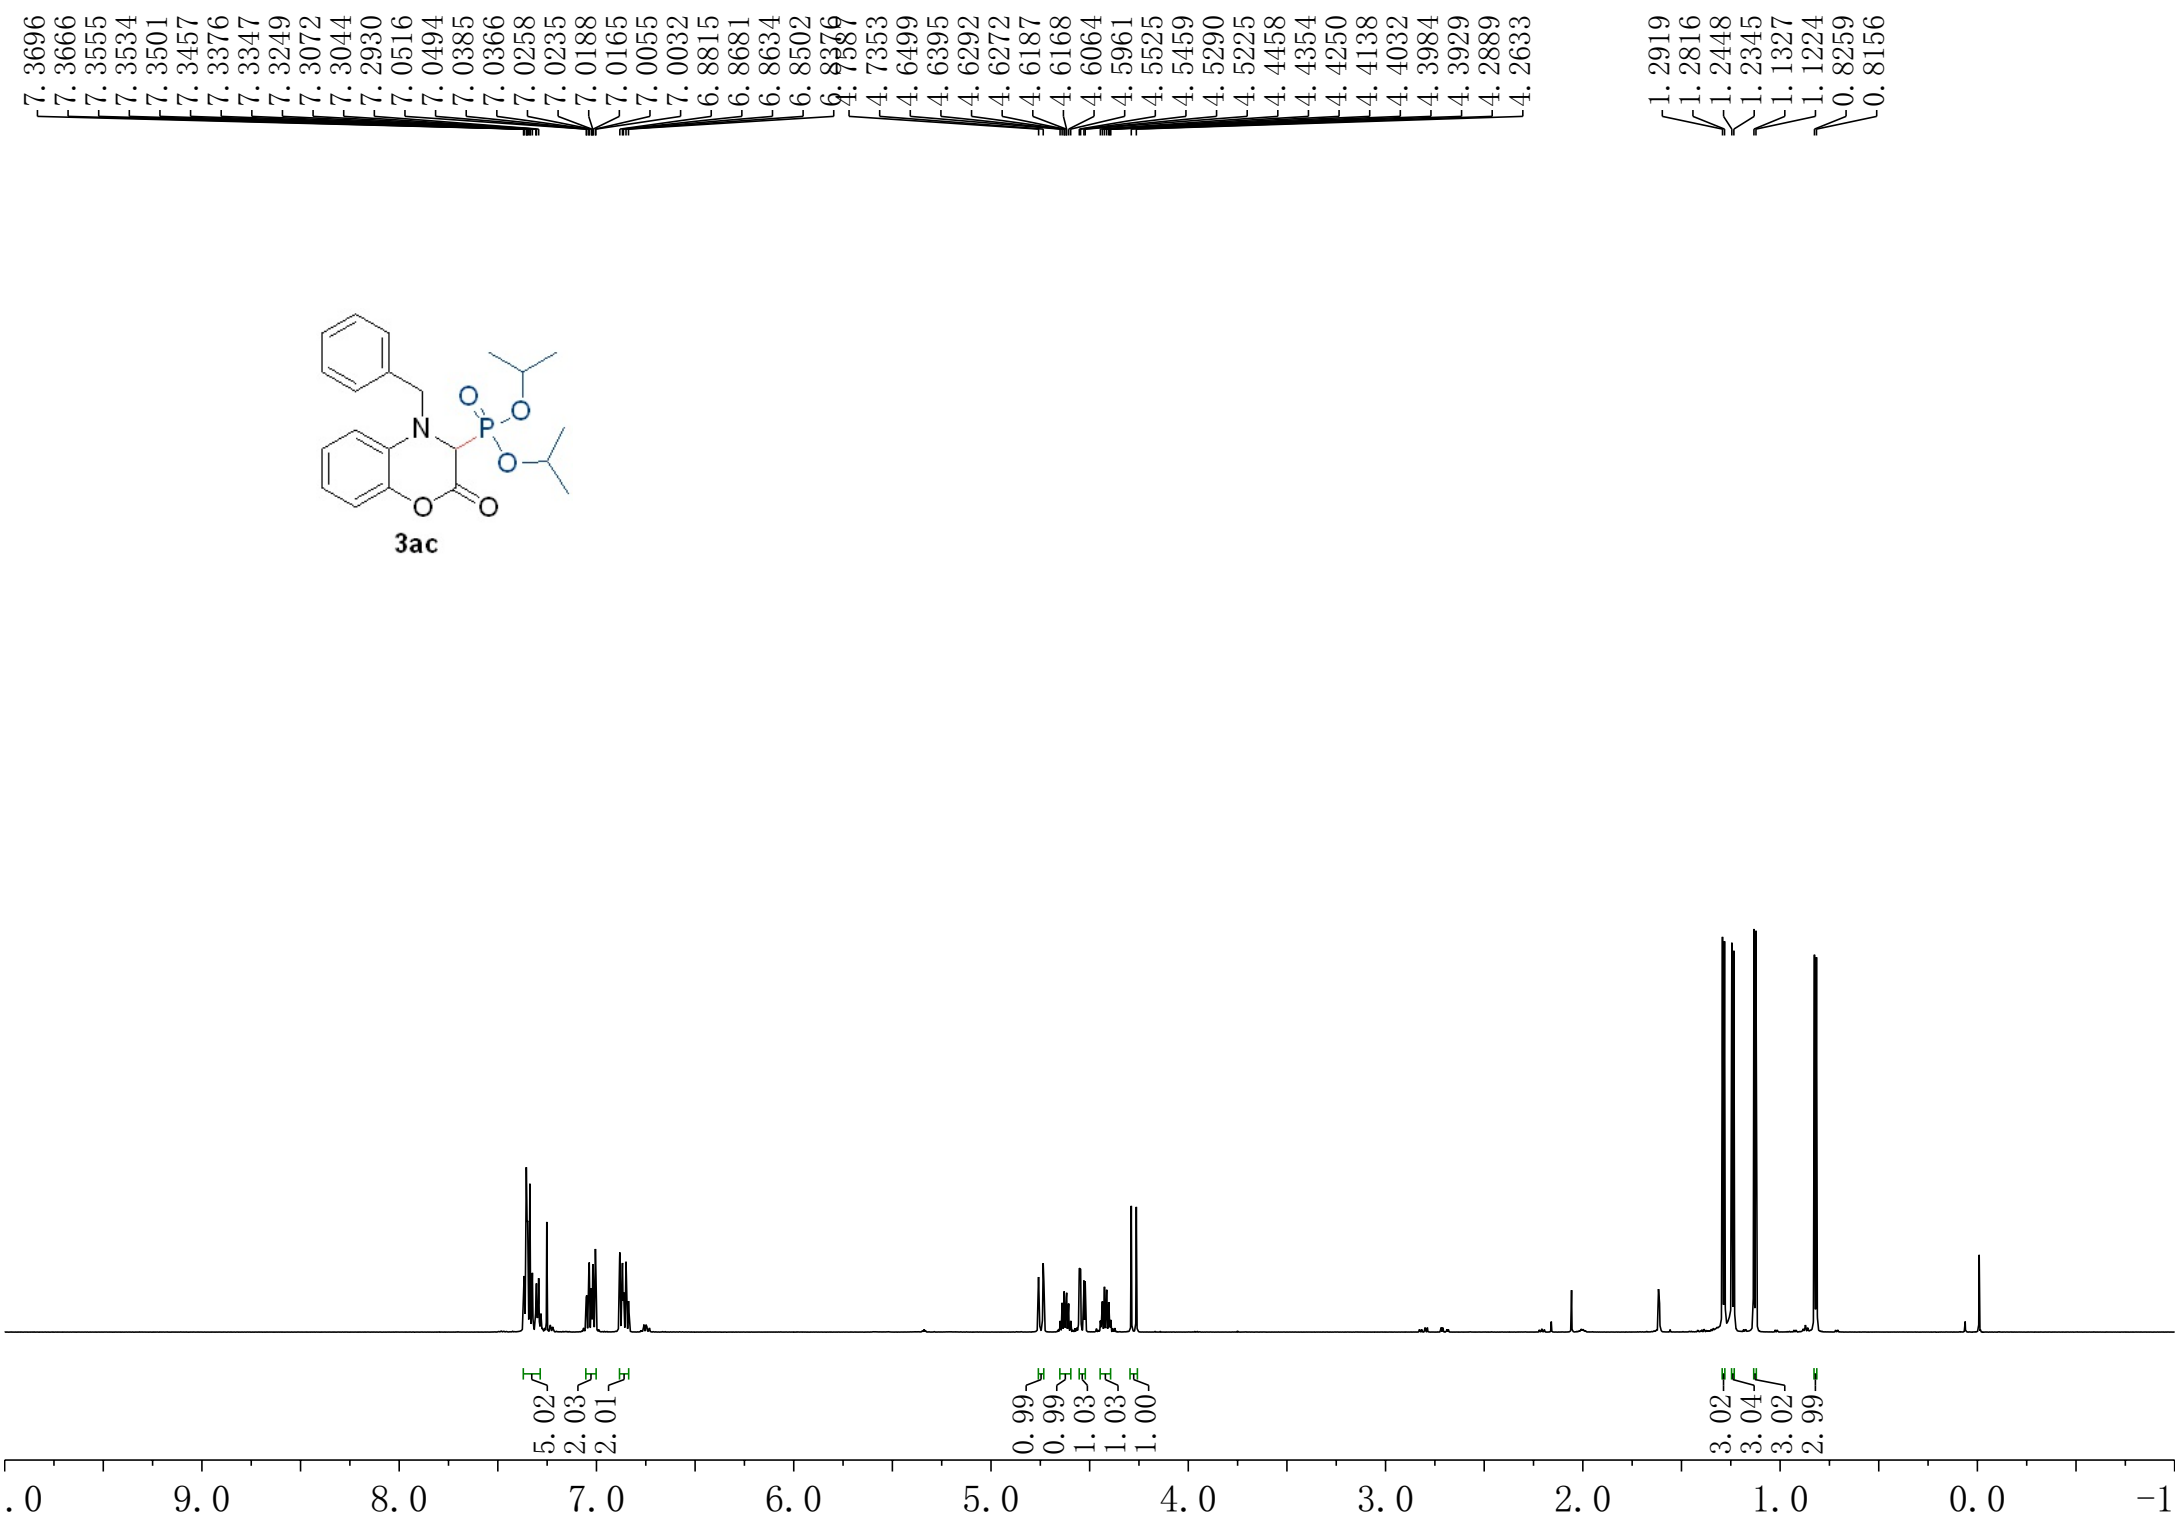



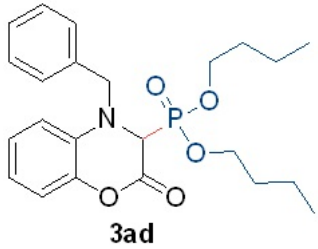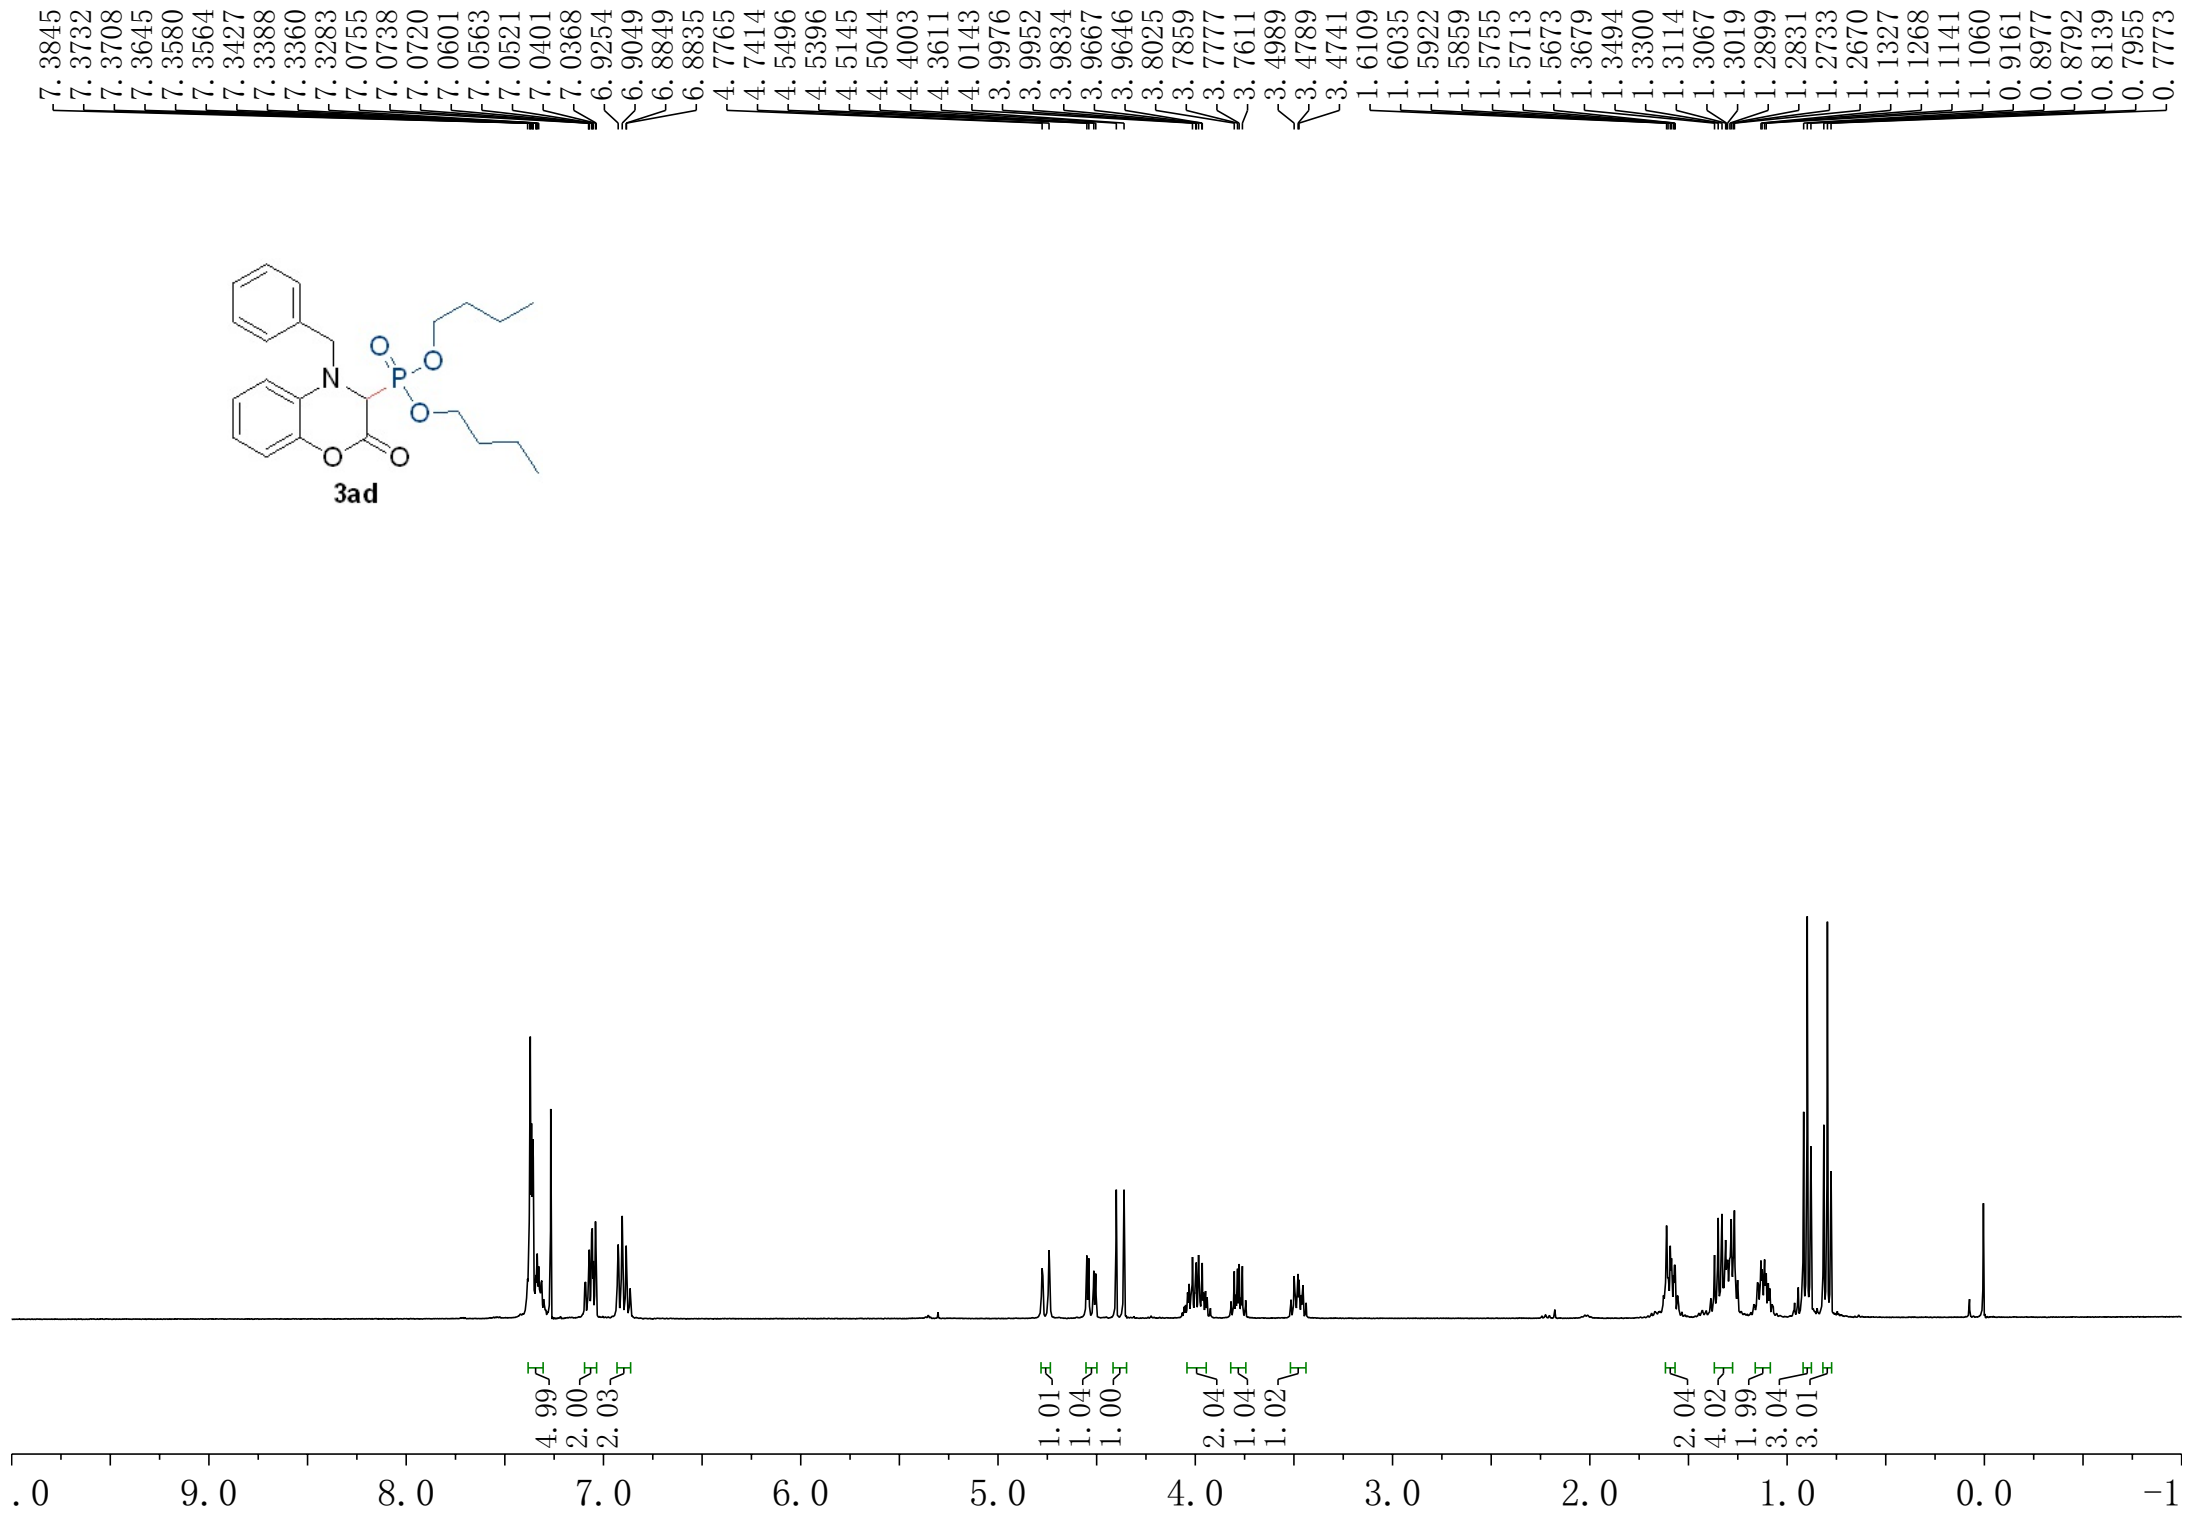

7.3311  
7.3133  
7.3038  
7.2973  
7.2727  
7.2653  
7.2617  
7.2570  
7.2472  
7.2345  
7.2254  
7.0650  
7.0463  
7.0427  
7.0312  
7.0270  
7.0217  
7.0142  
7.0078  
6.9806  
6.9770  
6.9606  
6.9570  
6.9196  
6.8997  
6.8466  
6.8386  
4.9094  
4.8948  
4.8869  
4.8722  
4.8659  
4.8430  
4.7587  
4.7232  
4.7044  
4.6942  
4.6755  
4.4893  
4.4788  
4.4612  
4.4541  
4.4436  
4.4220  
4.3853  
4.3607  
4.3566  
4.3319

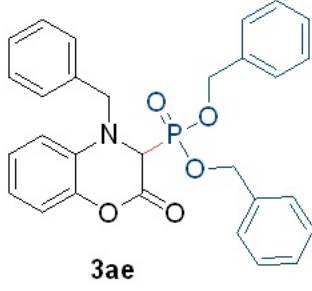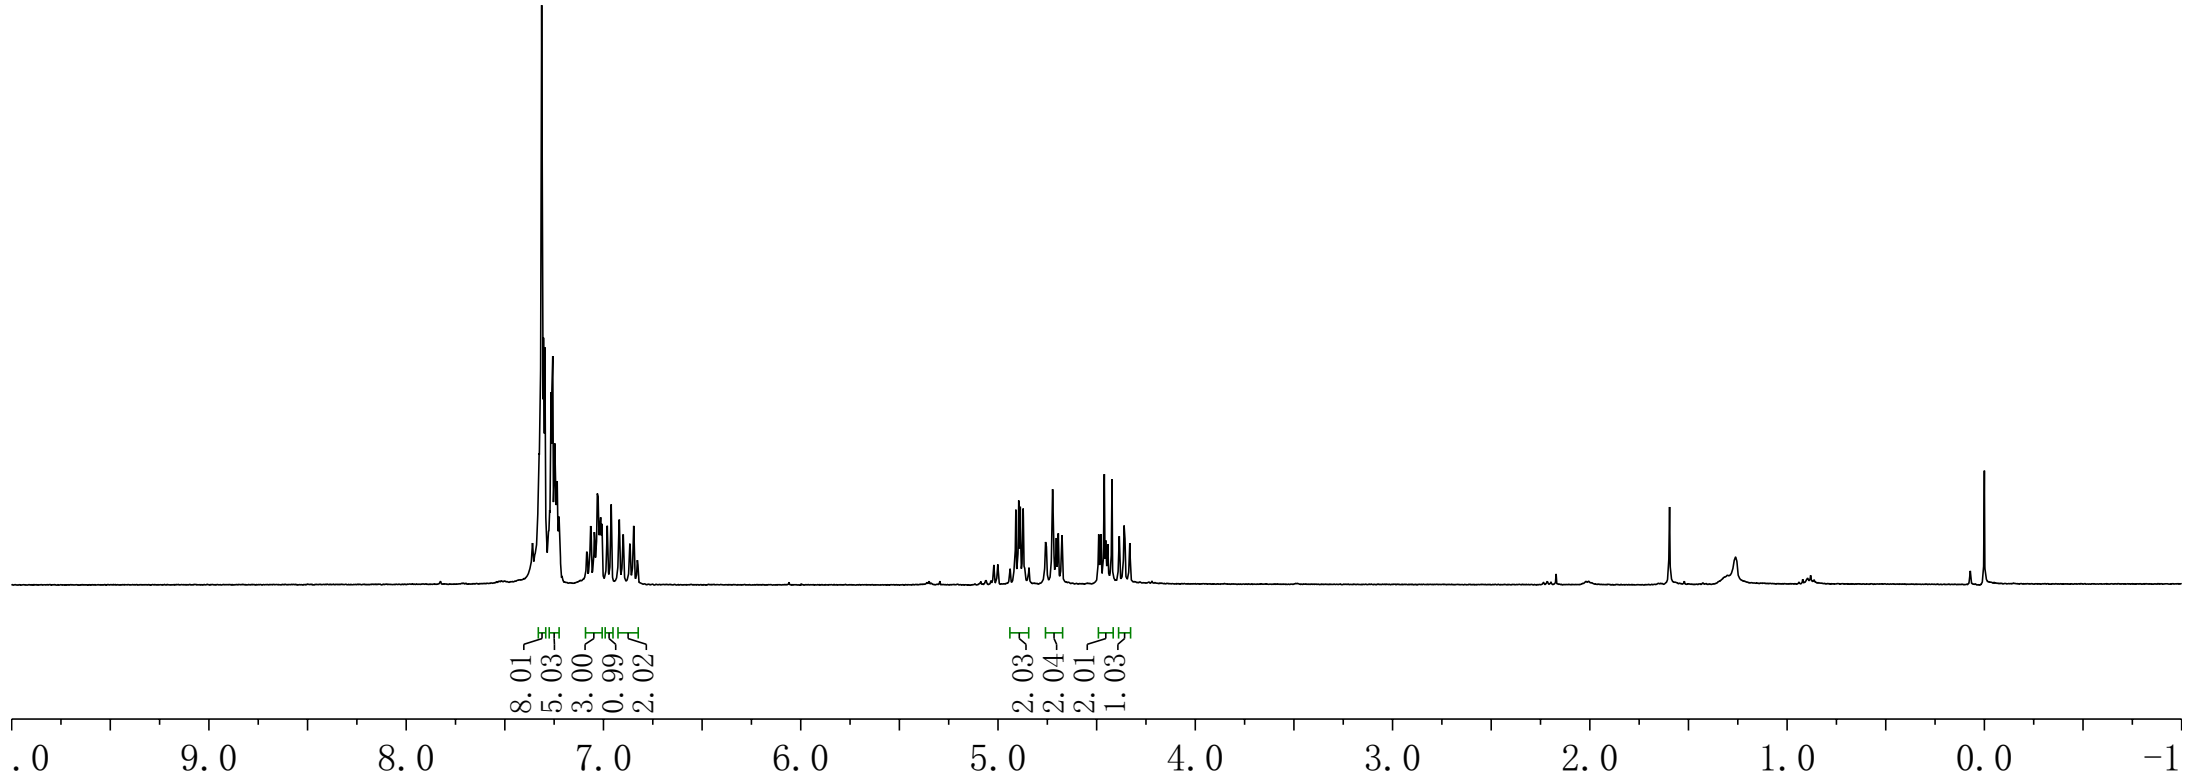

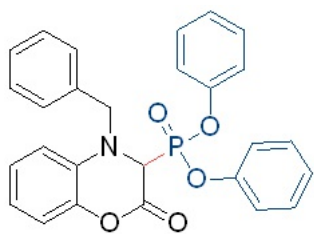

3af

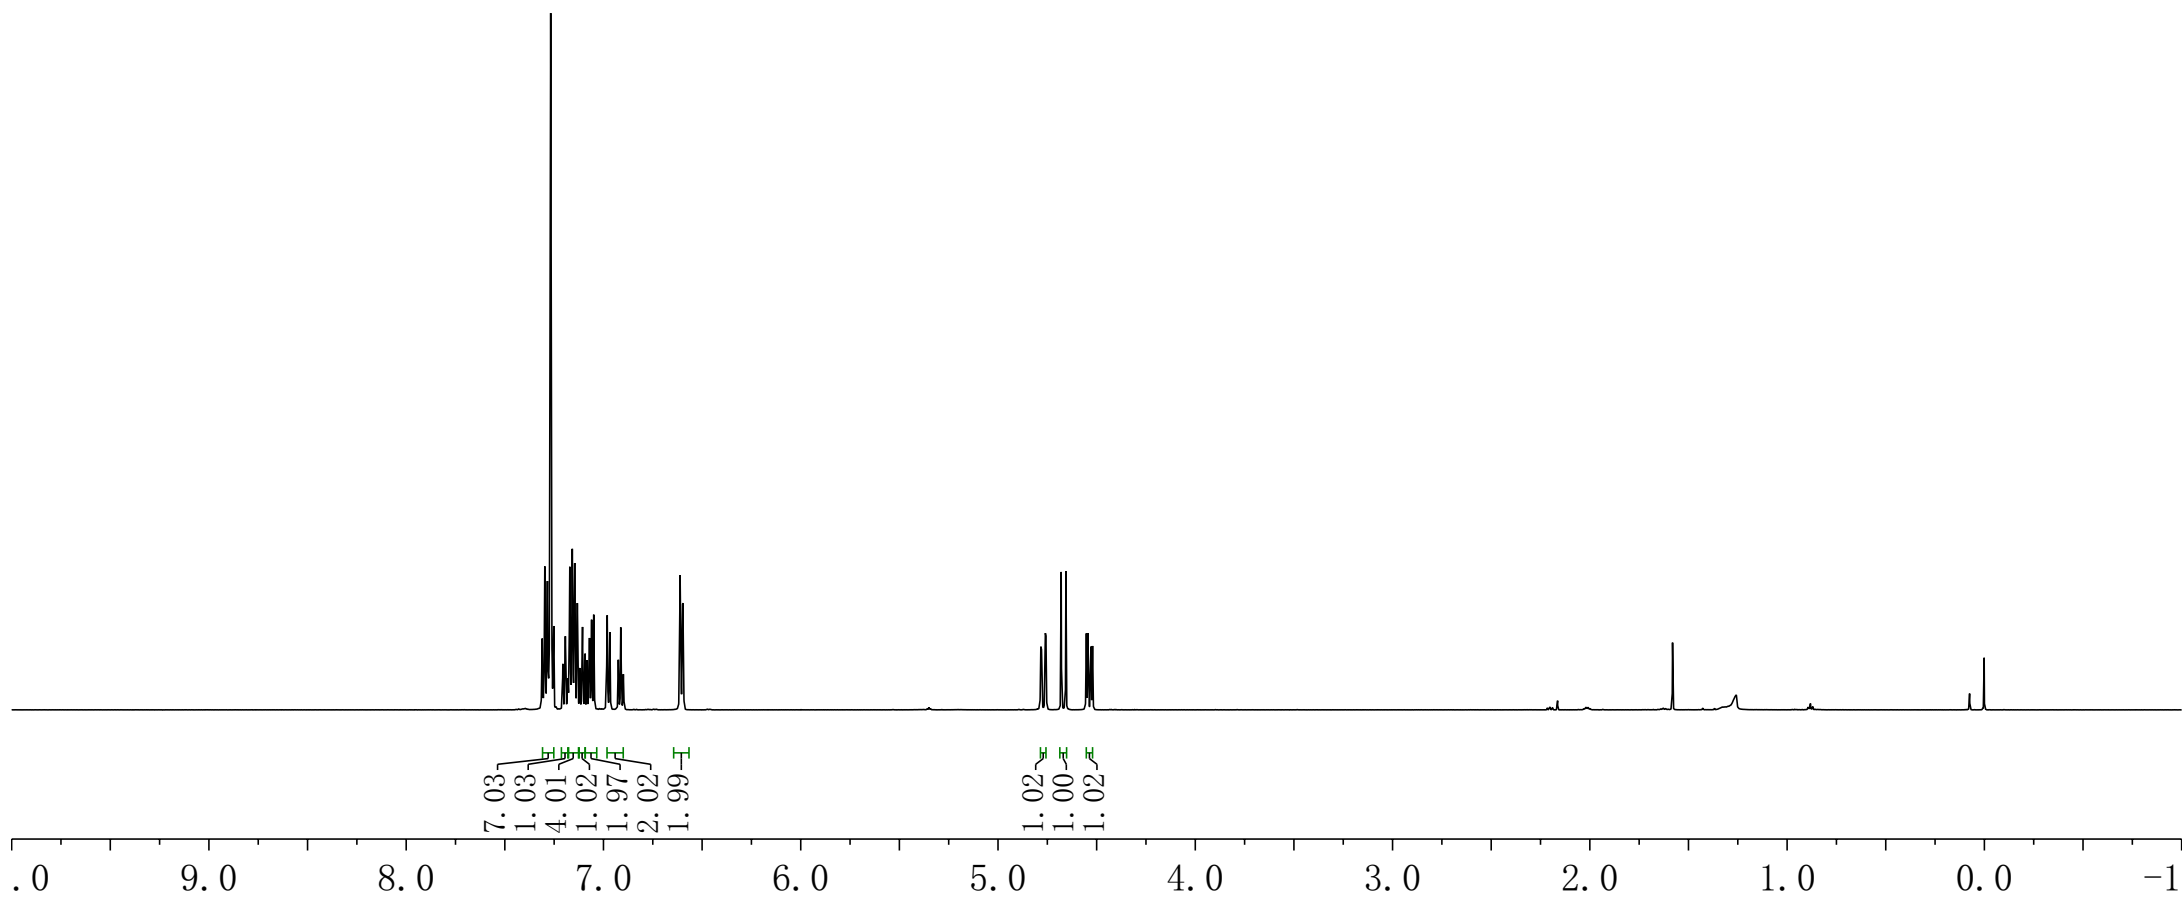

7.3106  
7.2975  
7.2841  
7.2674  
7.2519  
7.2057  
7.1931  
7.1724  
7.1706  
7.1582  
7.1459  
7.1323  
7.1083  
7.1062  
7.0954  
7.0931  
7.0837  
7.0710  
7.0625  
7.0602  
7.0492  
7.0470  
6.9810  
6.9678  
6.9247  
6.9123  
6.6114  
6.6092  
6.5983  
6.5972  
6.5836  
4.7601  
4.6797  
4.6558  
4.5522  
4.5436  
4.5293  
4.5207

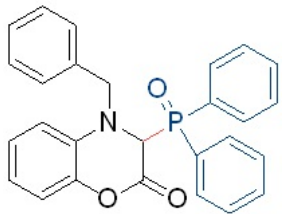

3ag

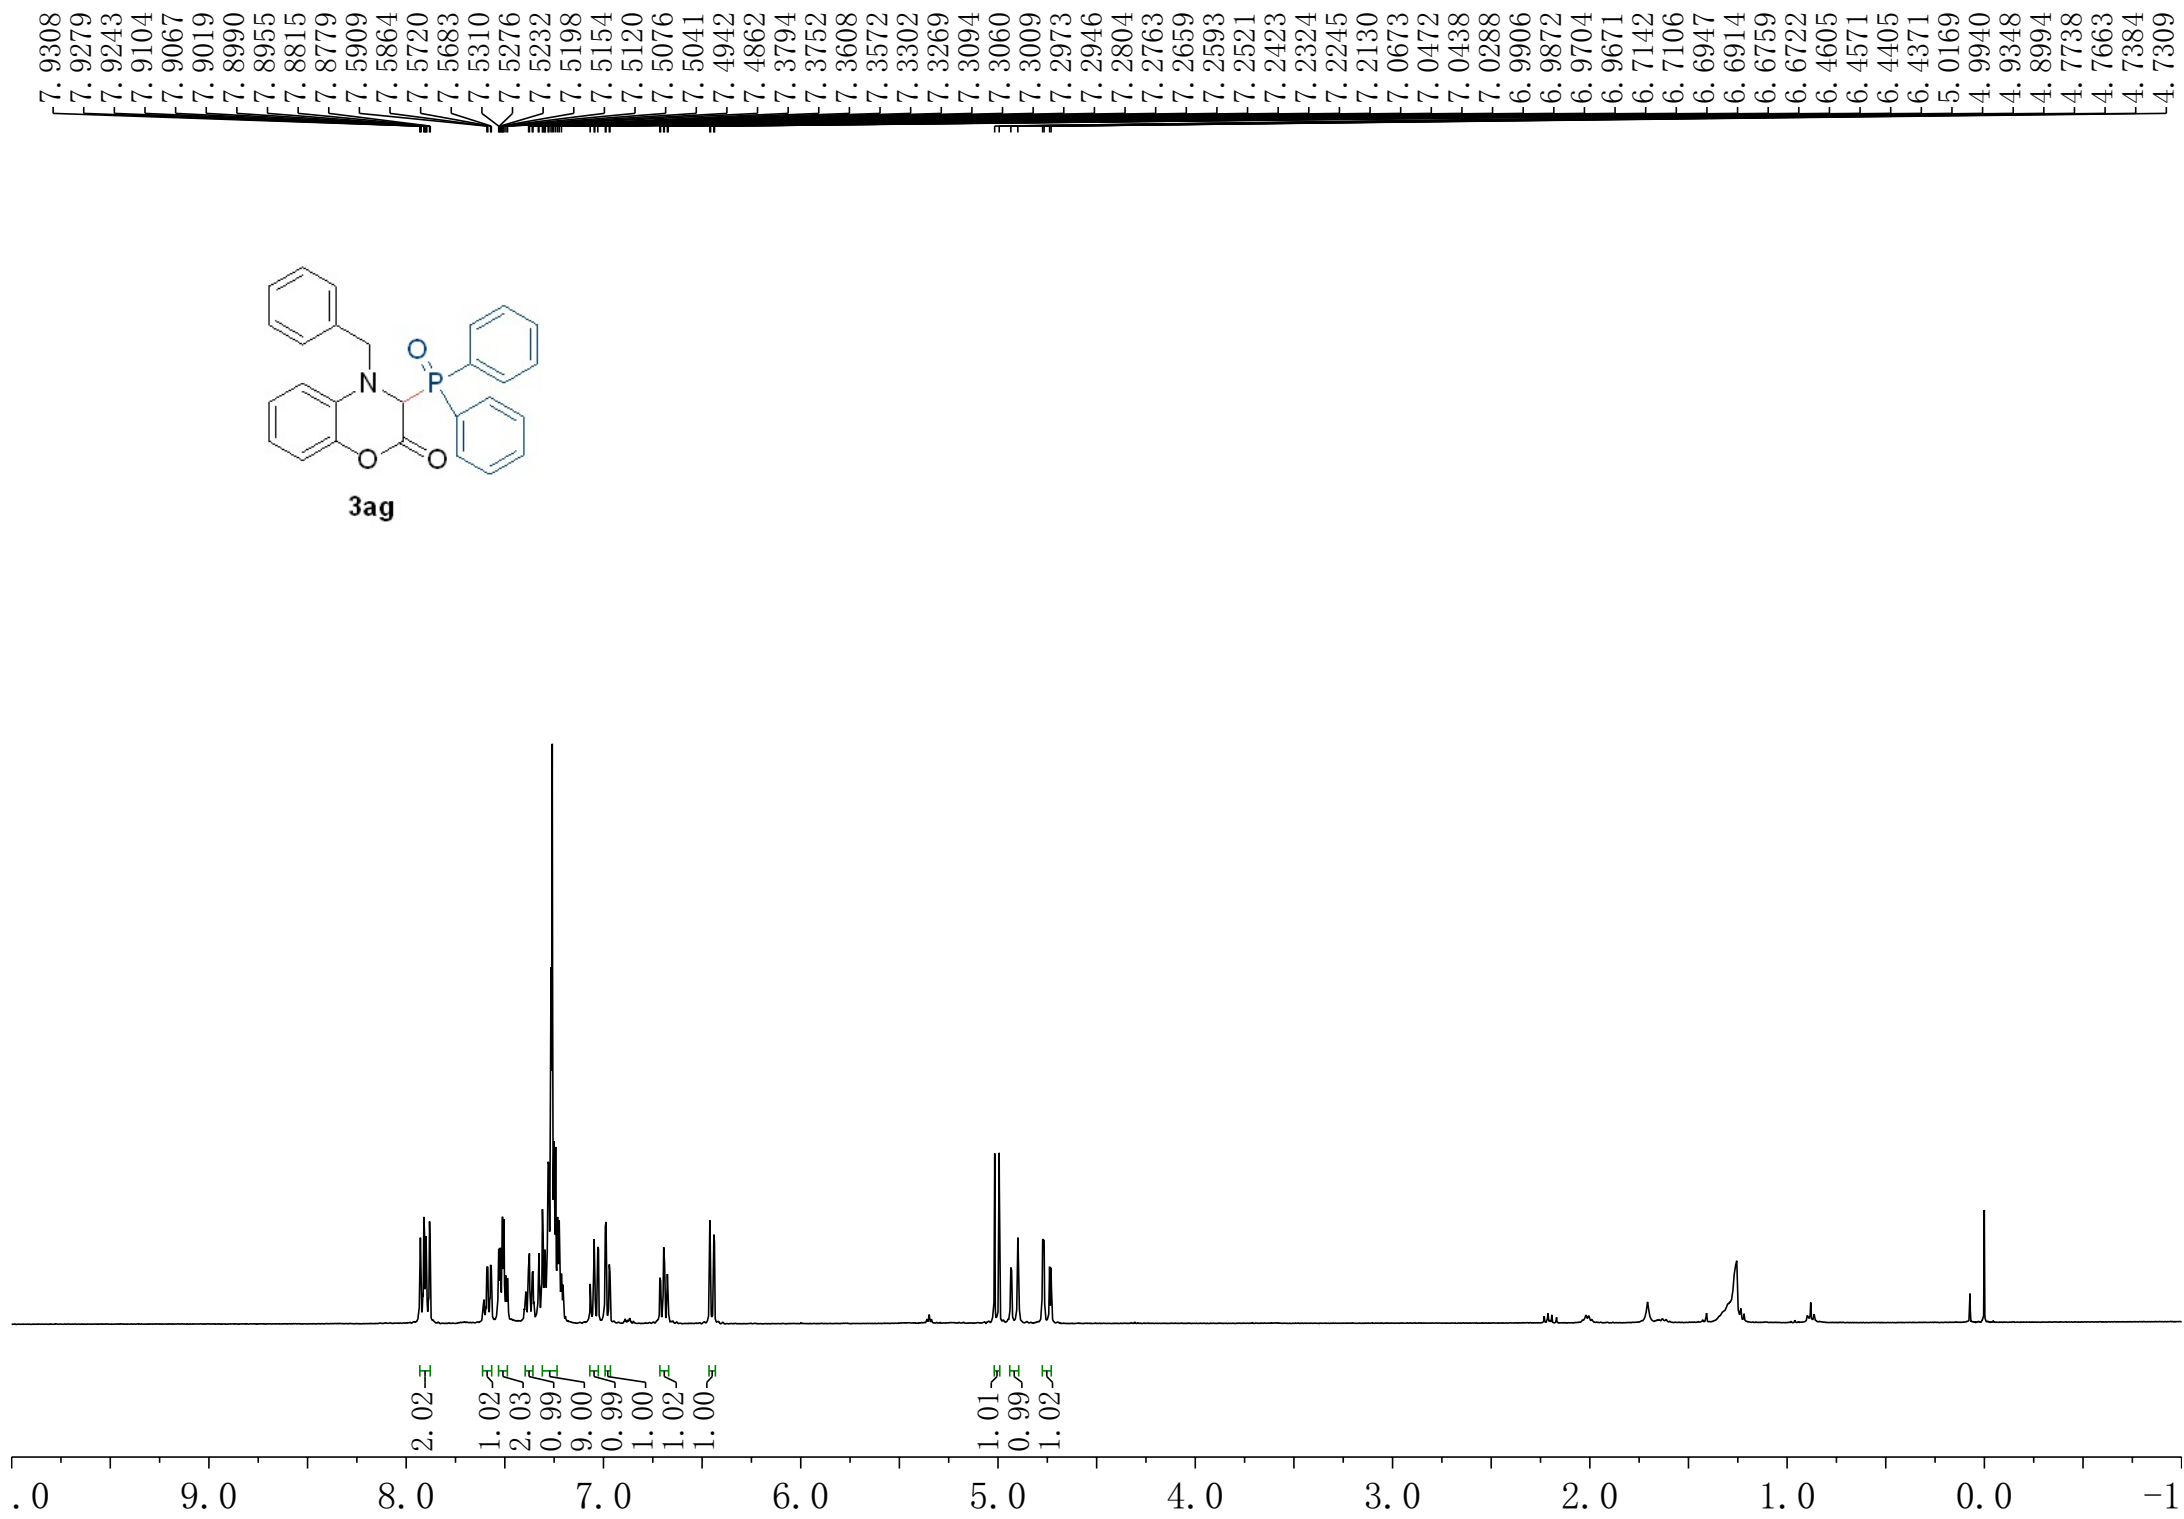

7.7600  
 7.7465  
 7.7410  
 7.7275  
 7.3045  
 7.3004  
 7.2912  
 7.2869  
 7.2647  
 7.2523  
 7.2453  
 7.2399  
 7.2352  
 7.1946  
 7.1812  
 7.1751  
 7.1617  
 7.0247  
 7.0198  
 7.0114  
 7.0068  
 6.9480  
 6.9348  
 6.8461  
 6.8445  
 6.8317  
 6.7023  
 6.7003  
 6.6893  
 6.6766  
 6.6747  
 6.4704  
 6.4683  
 6.4571  
 6.4550  
 4.9786  
 4.9633  
 4.9067  
 4.8828  
 4.7253  
 4.7207  
 4.7015  
 4.6969  
 2.4140  
 2.2932

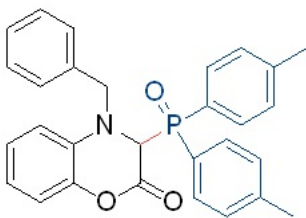

**3ah**

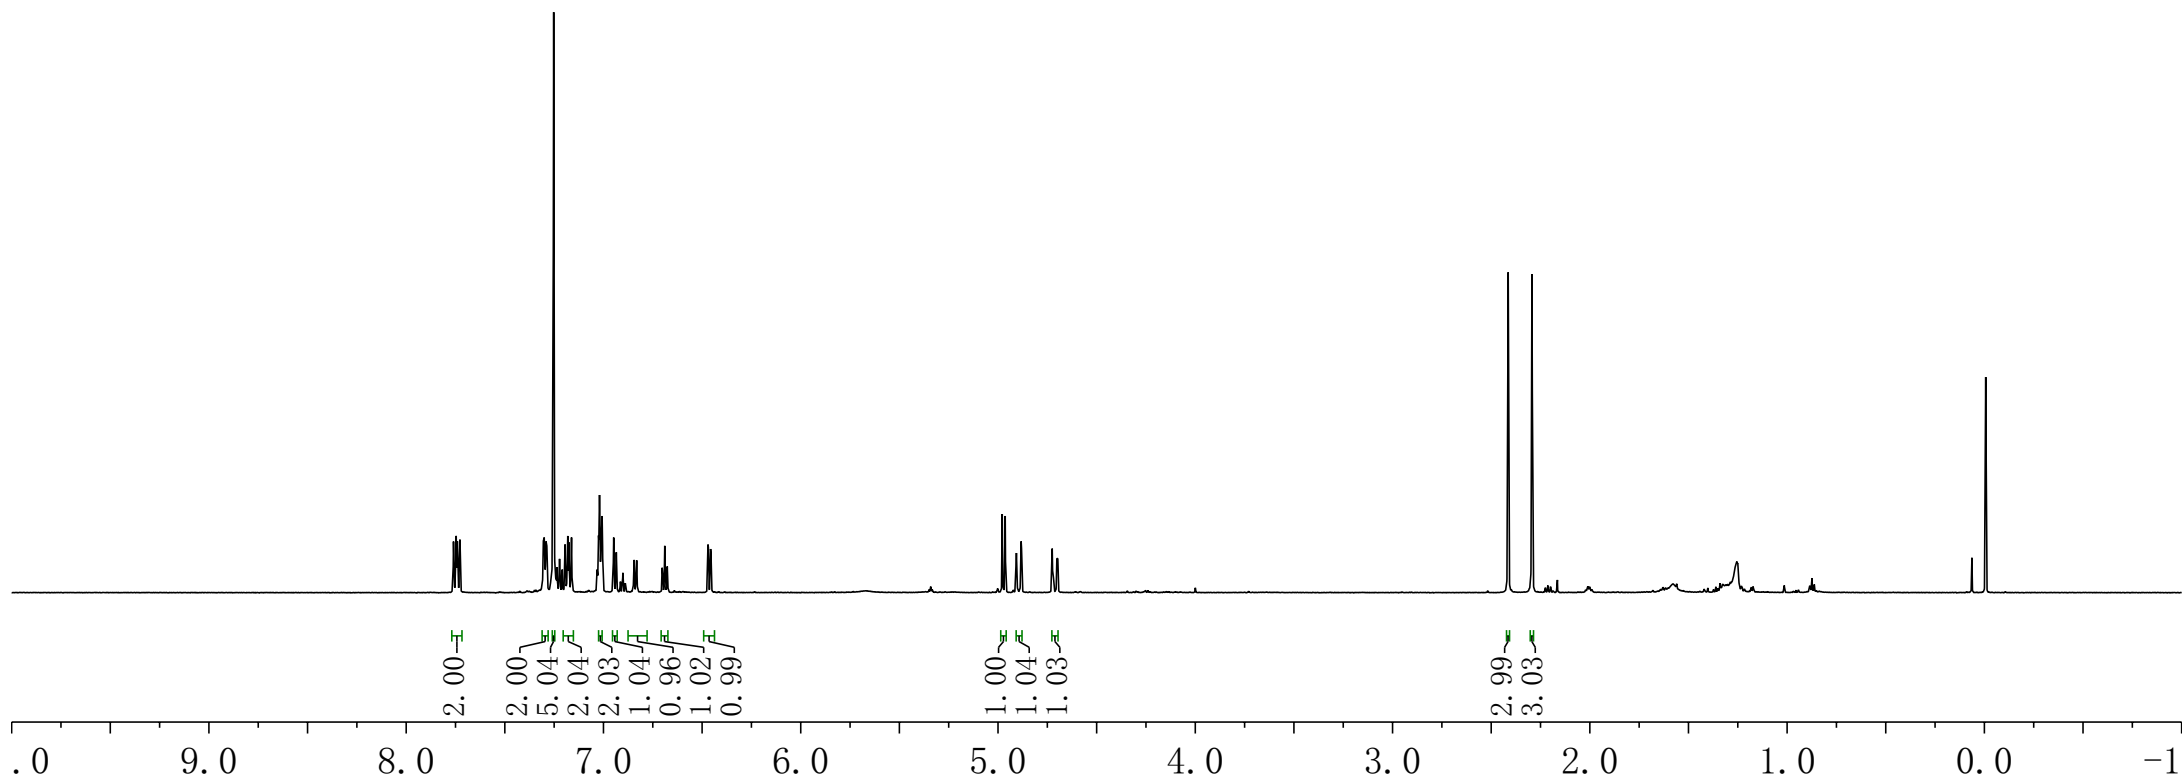

7.2870  
7.2726  
7.1095  
7.1072  
7.0962  
7.0948  
7.0836  
7.0815  
7.0749  
7.0728  
7.0615  
7.0594  
6.9669  
6.9538  
6.9127  
6.9000  
6.8874  
6.8729

4.6616  
4.6392  
4.4337  
4.4258  
4.4113  
4.4034  
4.3975  
4.3711  
3.8022  
3.6869  
3.6685  
3.2788  
3.2604

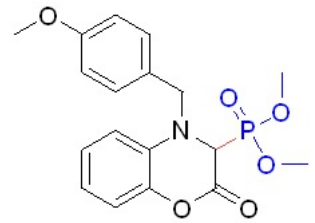

3ba

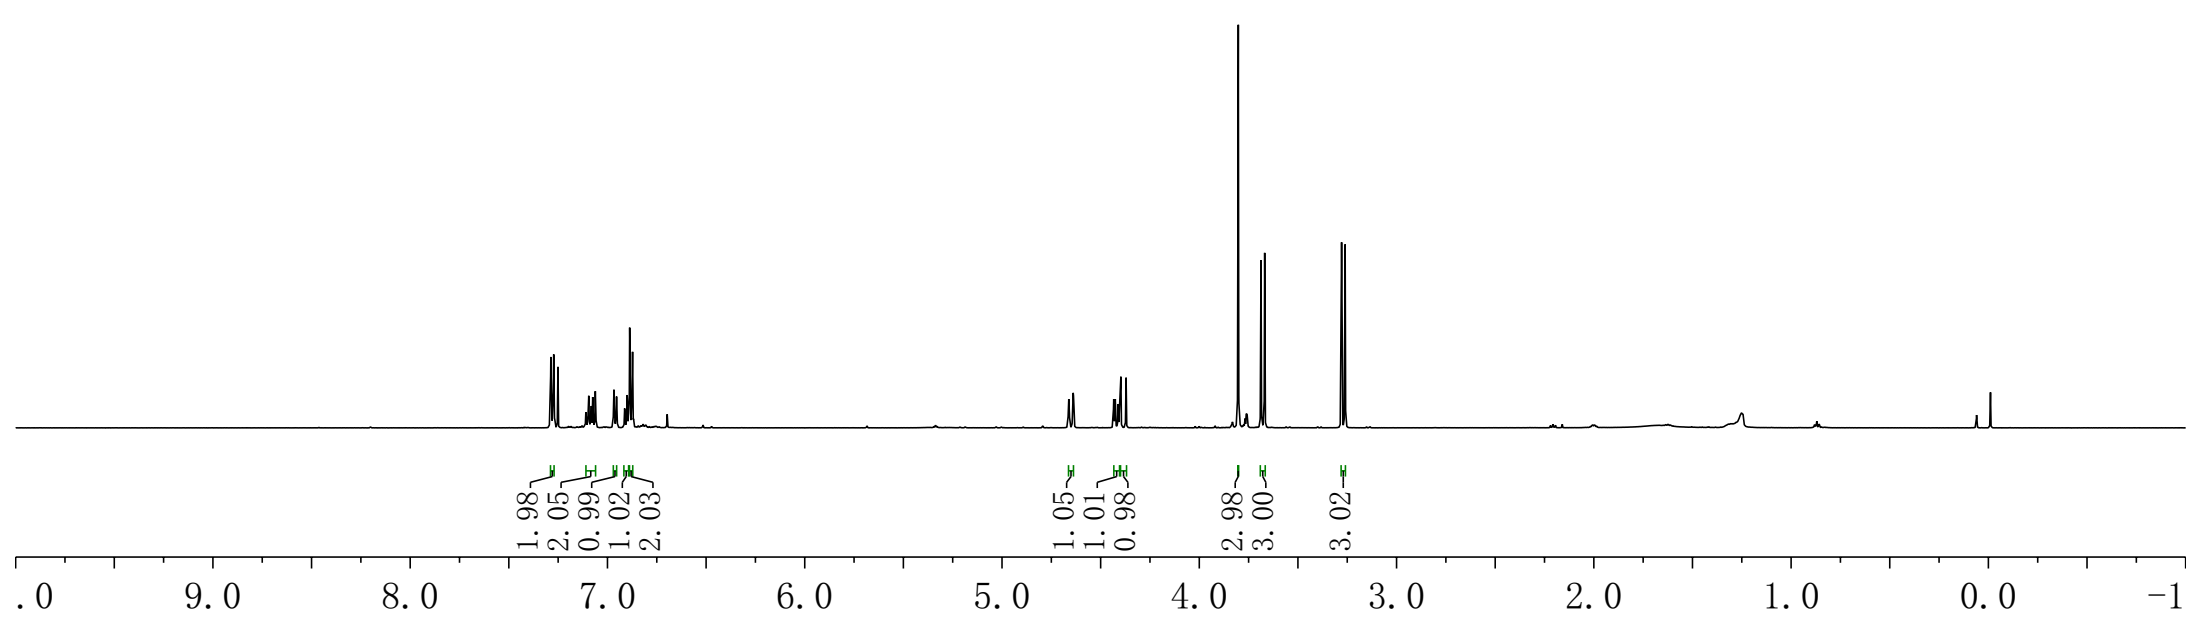

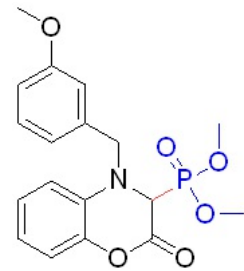

3ca

7.2689  
7.2558  
7.2520  
7.2426  
7.0934  
7.0912  
7.0777  
7.0654  
7.0635  
6.9450  
6.9332  
6.9209  
6.9100  
6.8968  
6.8853  
6.8481  
6.8441  
6.8344  
6.8304

4.7152  
4.6919  
4.4637  
4.4568  
4.4401  
4.4336  
4.4139  
3.7667  
3.6941  
3.6756  
3.2882  
3.2699

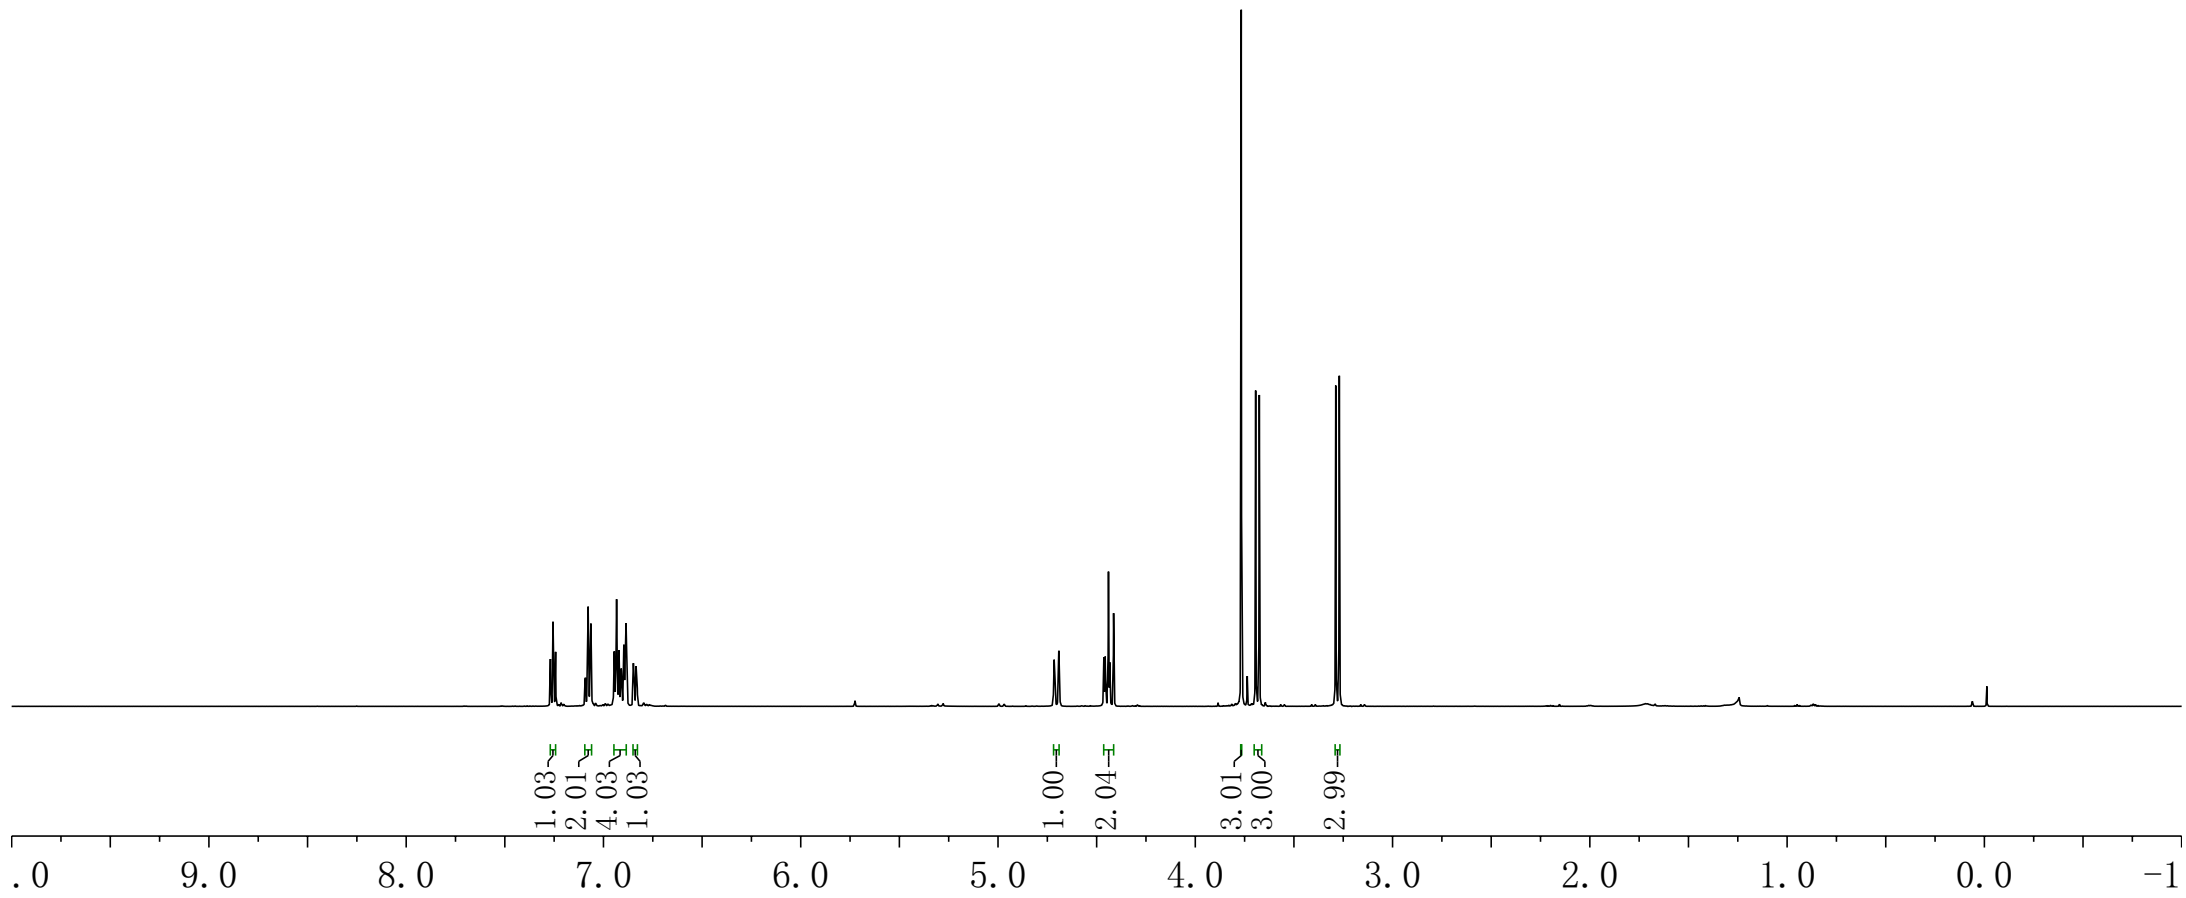

7.2839  
7.2798  
7.2604  
7.2550  
7.2406  
7.2366  
7.0719  
7.0684  
7.0512  
7.0495  
7.0334  
7.0290  
7.0243  
7.0075  
7.0042  
6.9685  
6.9498  
6.9035  
6.8840  
6.8643  
6.8460  
6.8276  
6.8076  
4.7944  
4.7569  
4.6967  
4.6552  
4.4373  
4.4313  
4.3998  
4.3938  
3.8004  
3.7502  
3.7227  
3.3800  
3.3527

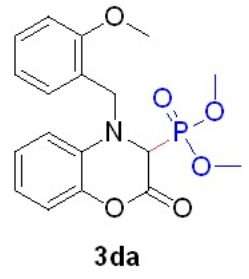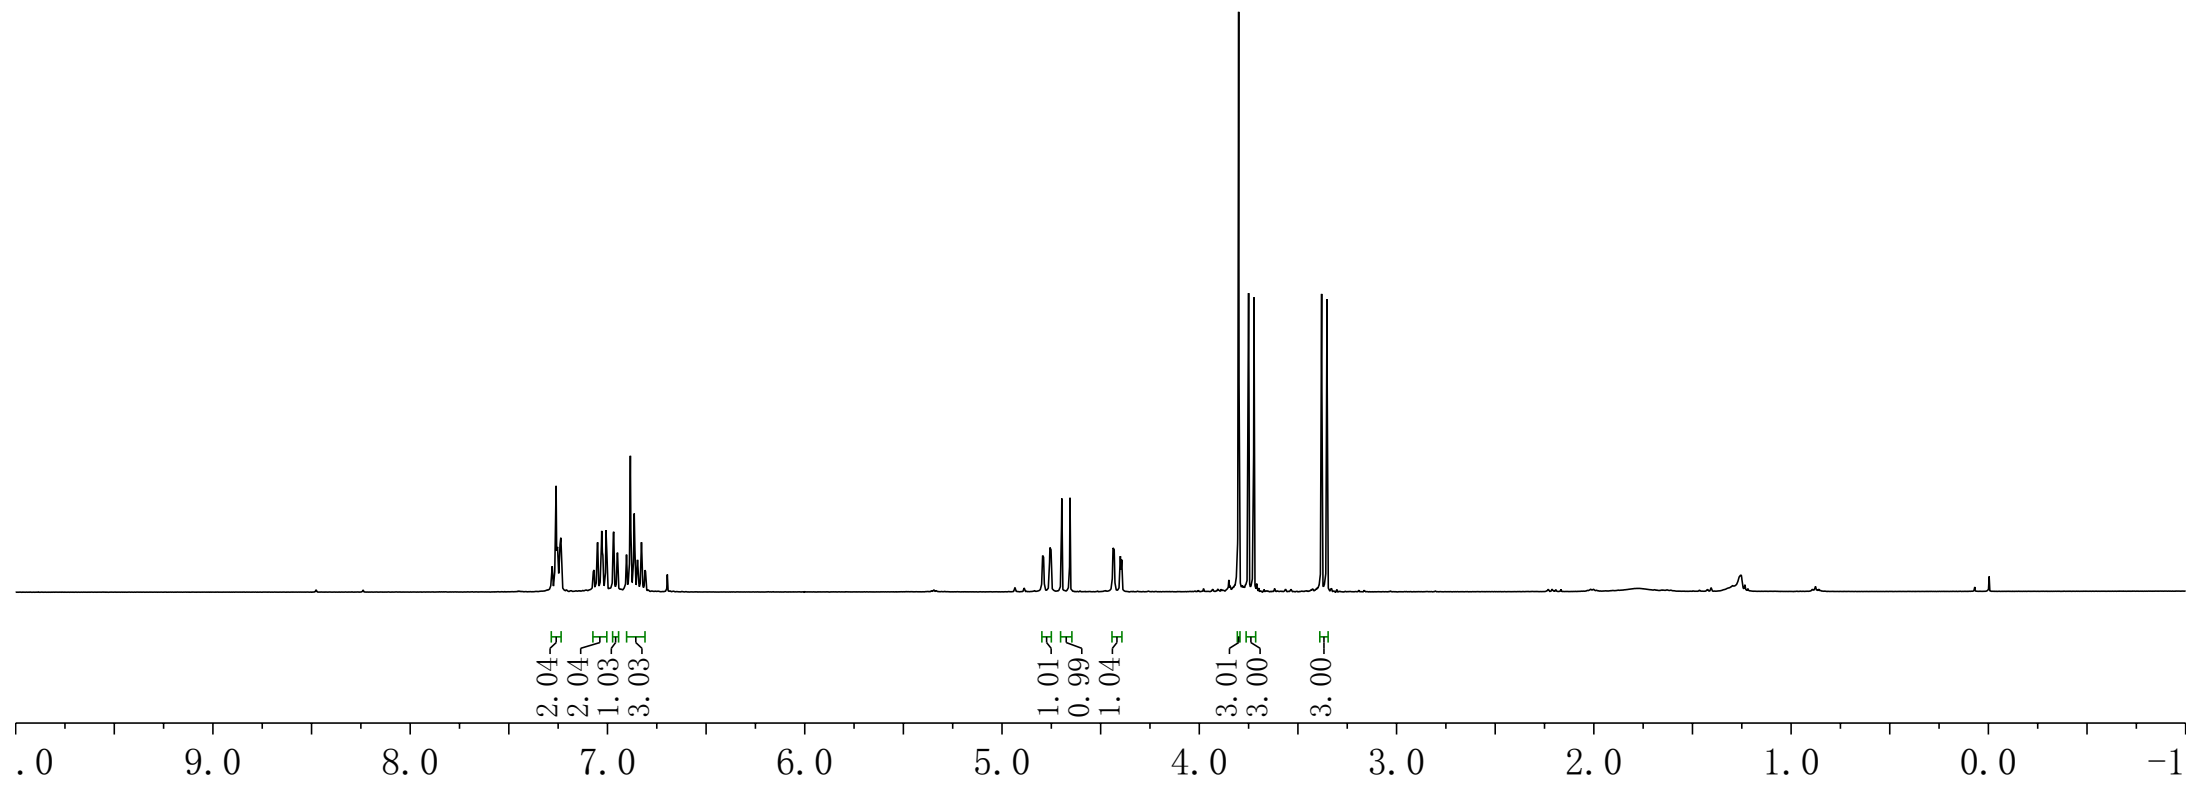



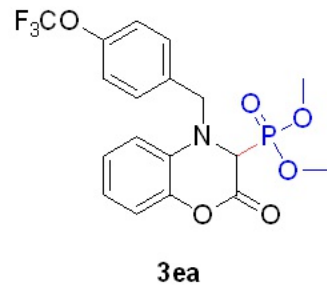

7.3958  
 7.3816  
 7.2028  
 7.1890  
 7.0933  
 7.0906  
 7.0883  
 7.0816  
 7.0772  
 7.0750  
 7.0695  
 6.9303  
 6.9297  
 6.9169  
 6.9046  
 6.8911  
 6.8775

4.7535  
 4.7296  
 4.5086  
 4.5023  
 4.4847  
 4.4784  
 4.4024  
 4.3764  
 3.7098  
 3.6912  
 3.2729  
 3.2545

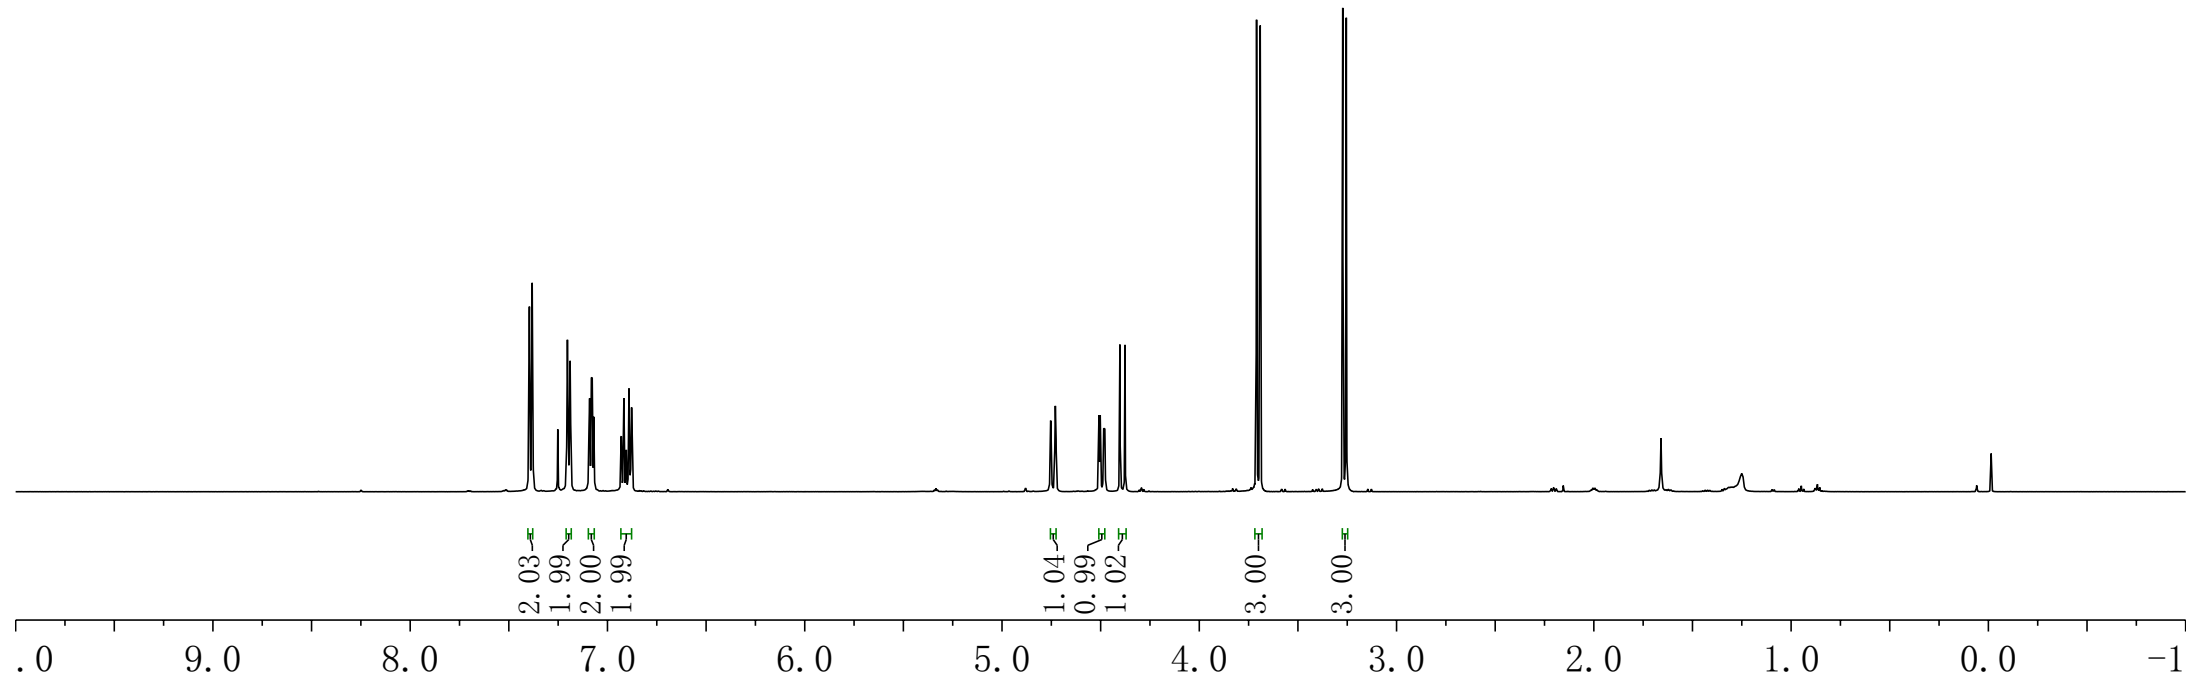

7.3471  
7.3380  
7.3331  
7.3241  
7.0992  
7.0973  
7.0837  
7.0713  
7.0692  
7.0542  
7.0399  
7.0256  
6.9232  
6.9188  
6.9114  
6.9055  
6.8994

4.7067  
4.6835  
4.4753  
4.4684  
4.4521  
4.4452  
4.3806  
4.3544  
3.7006  
3.6822  
3.2715  
3.2532

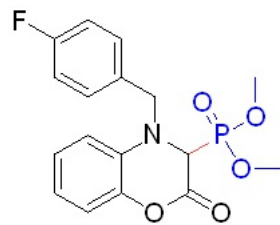

3fa

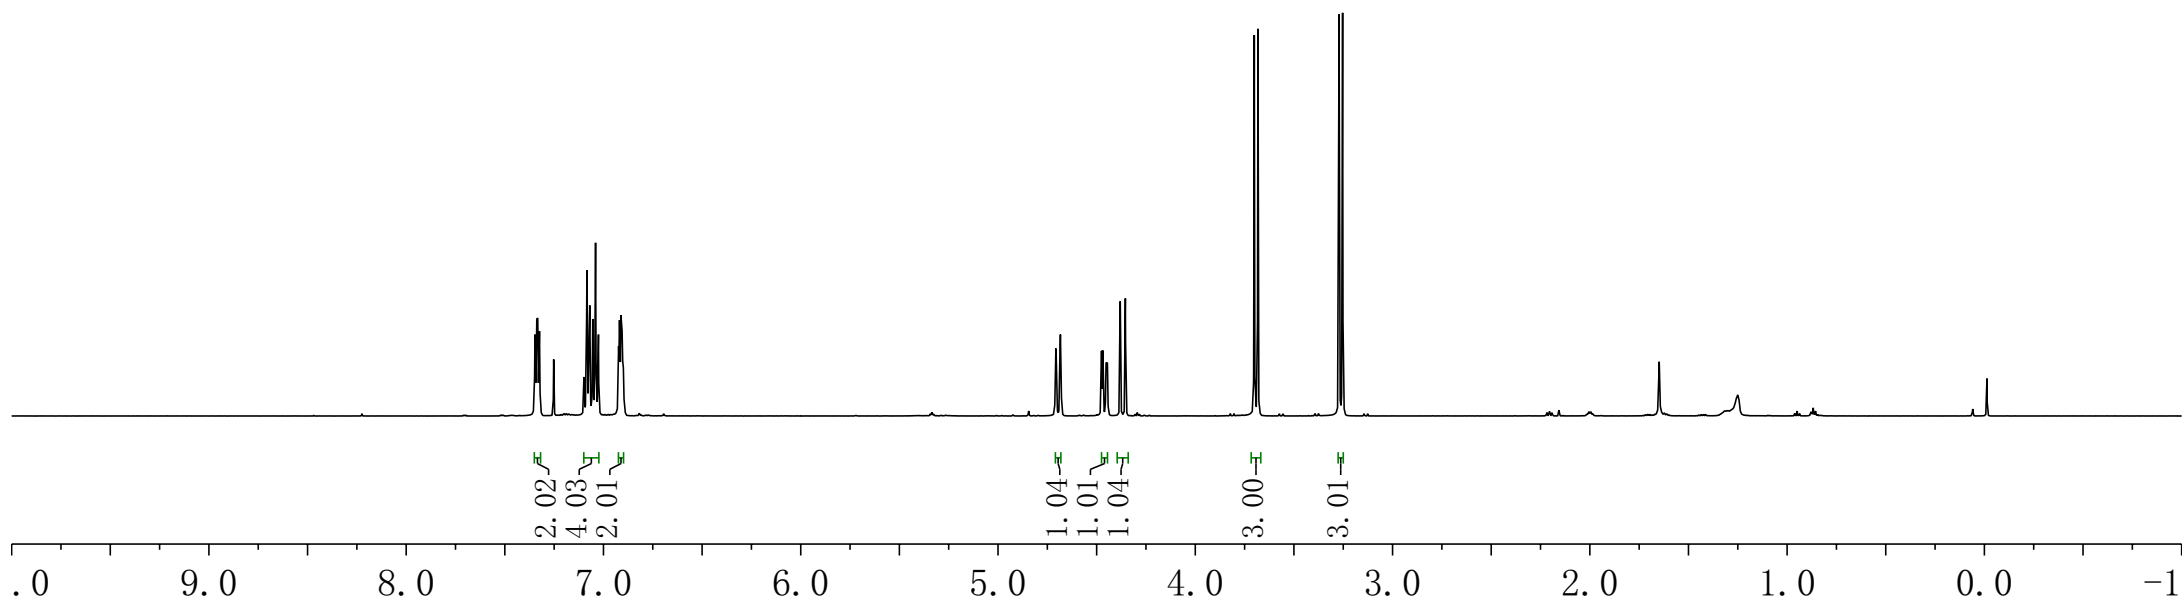

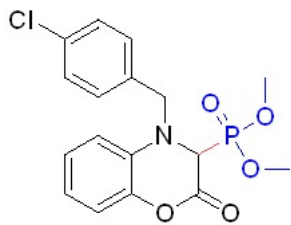

**3ga**

7.3312  
7.3277  
7.3206  
7.3169  
7.3138  
7.3015  
7.2979  
7.2904  
7.2873  
7.0875  
7.0852  
7.0828  
7.0754  
7.0719  
7.0695  
7.0637  
7.0613  
6.9247  
6.9235  
6.9122  
6.9106  
6.8991  
6.8976  
6.8871  
6.8737  
4.7165  
4.6928  
4.4732  
4.4667  
4.4495  
4.4430  
4.3906  
4.3645  
3.7096  
3.6911  
3.2722  
3.2538

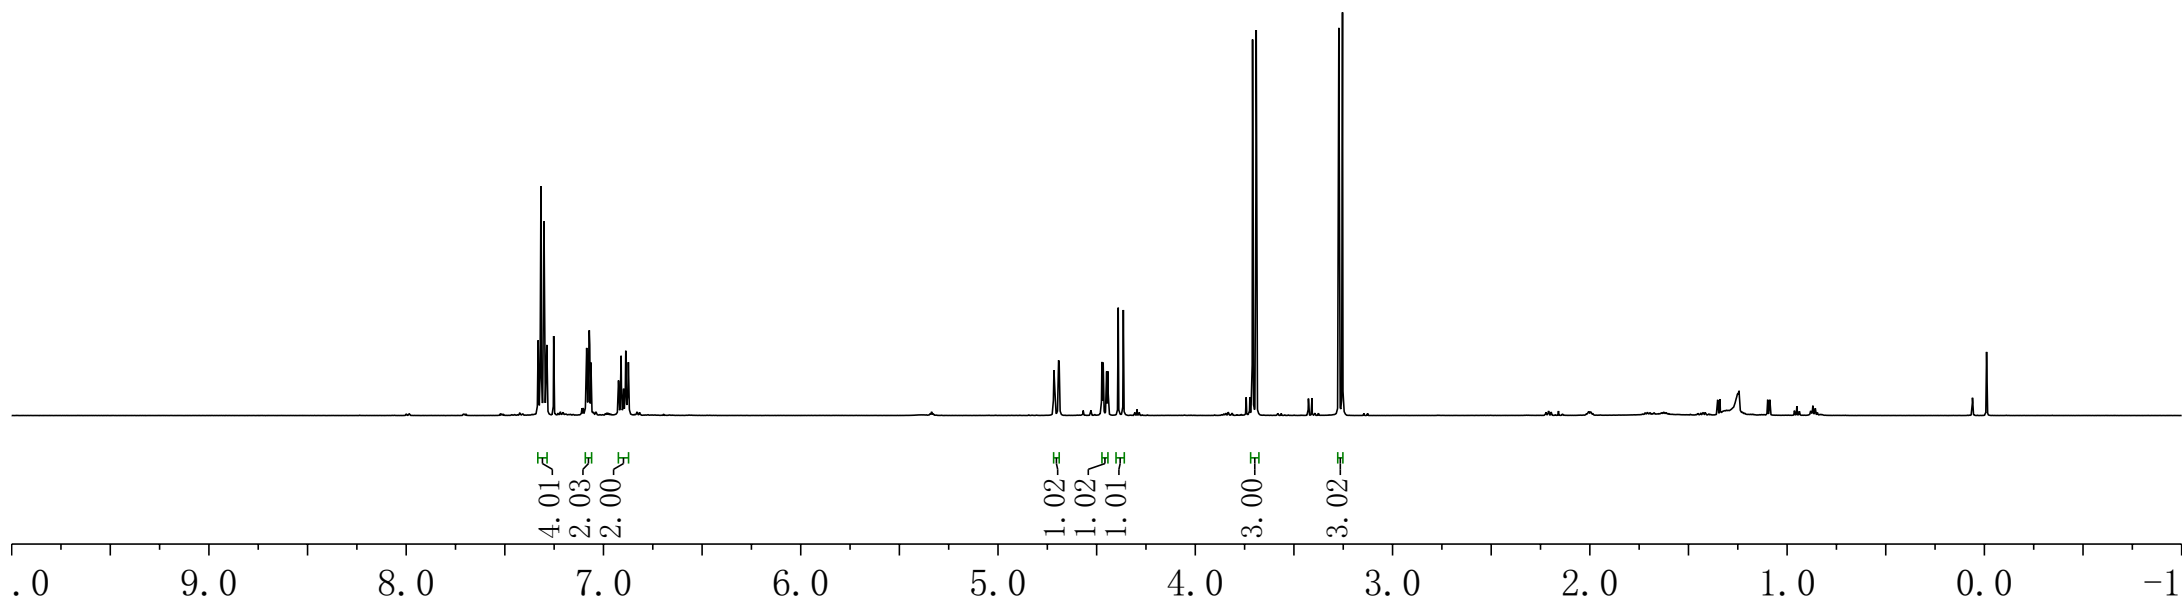

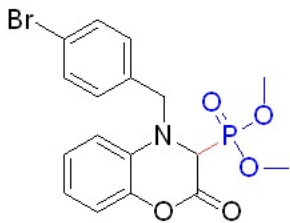

**3ha**

7.4753  
7.4613  
7.2376  
7.2237  
7.0778  
7.0752  
7.0669  
7.0643  
7.0619  
7.0551  
7.0530  
6.9170  
6.9038  
6.8921  
6.8735  
6.8600

4.6941  
4.6703  
4.4509  
4.4446  
4.4271  
4.4208  
4.3895  
4.3635  
3.7031  
3.6846  
3.2659  
3.2474

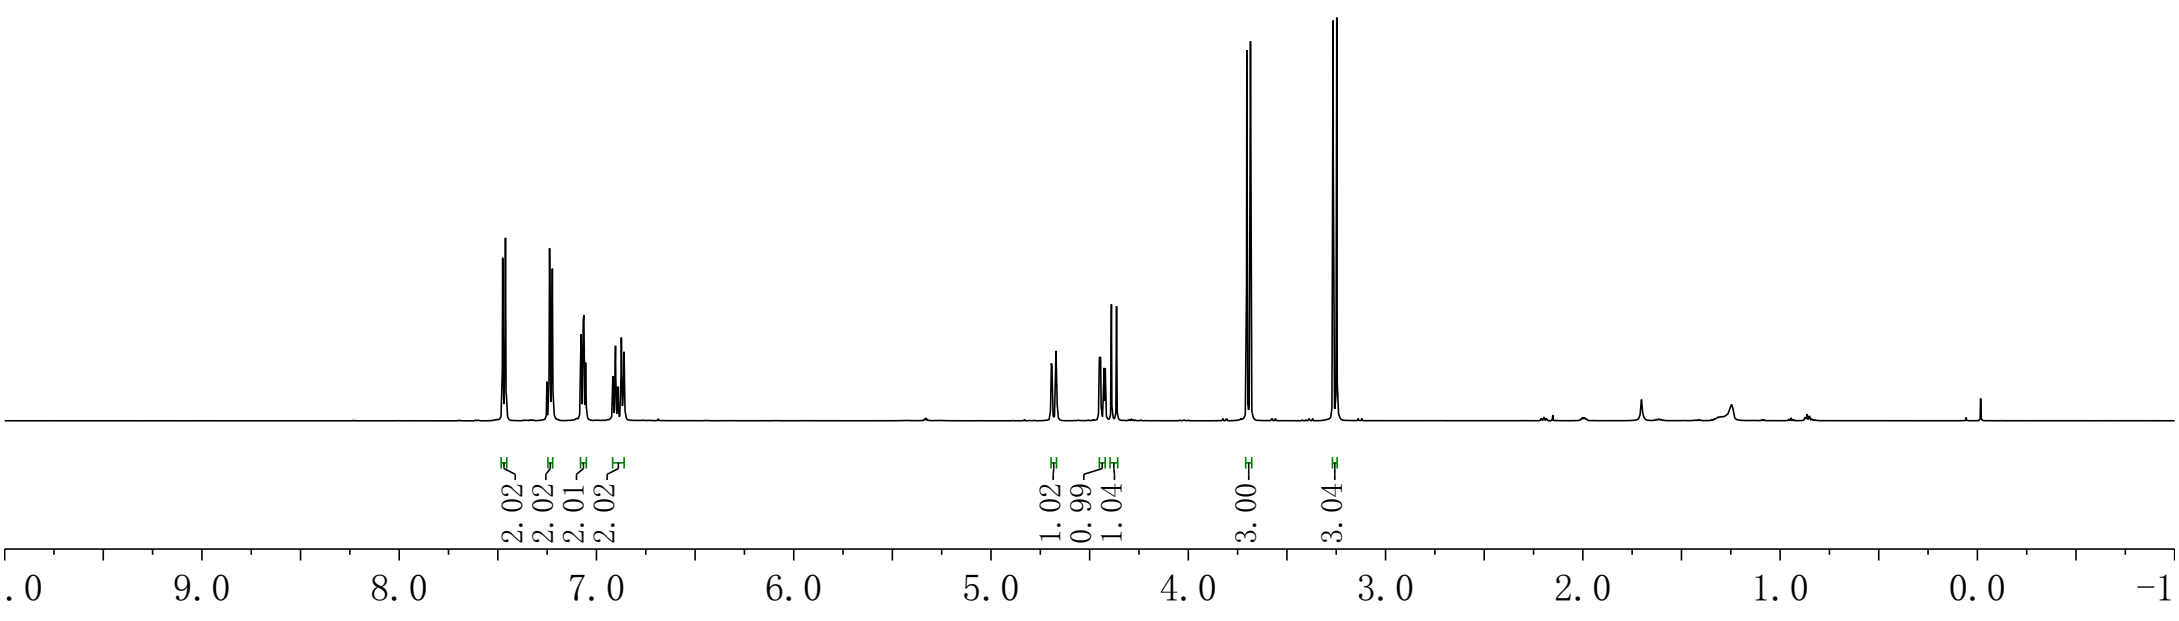

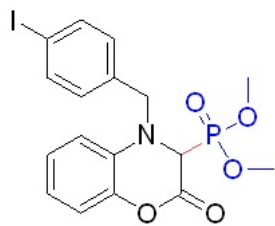

**3ia**

7.6836  
7.6698  
7.1117  
7.0980  
7.0834  
7.0704  
7.0593  
6.9212  
6.9083  
6.8953  
6.8729  
6.8597

4.6910  
4.6671  
4.4426  
4.4363  
4.4187  
4.4124  
4.3929  
4.3669  
3.7100  
3.6915  
3.2694  
3.2509

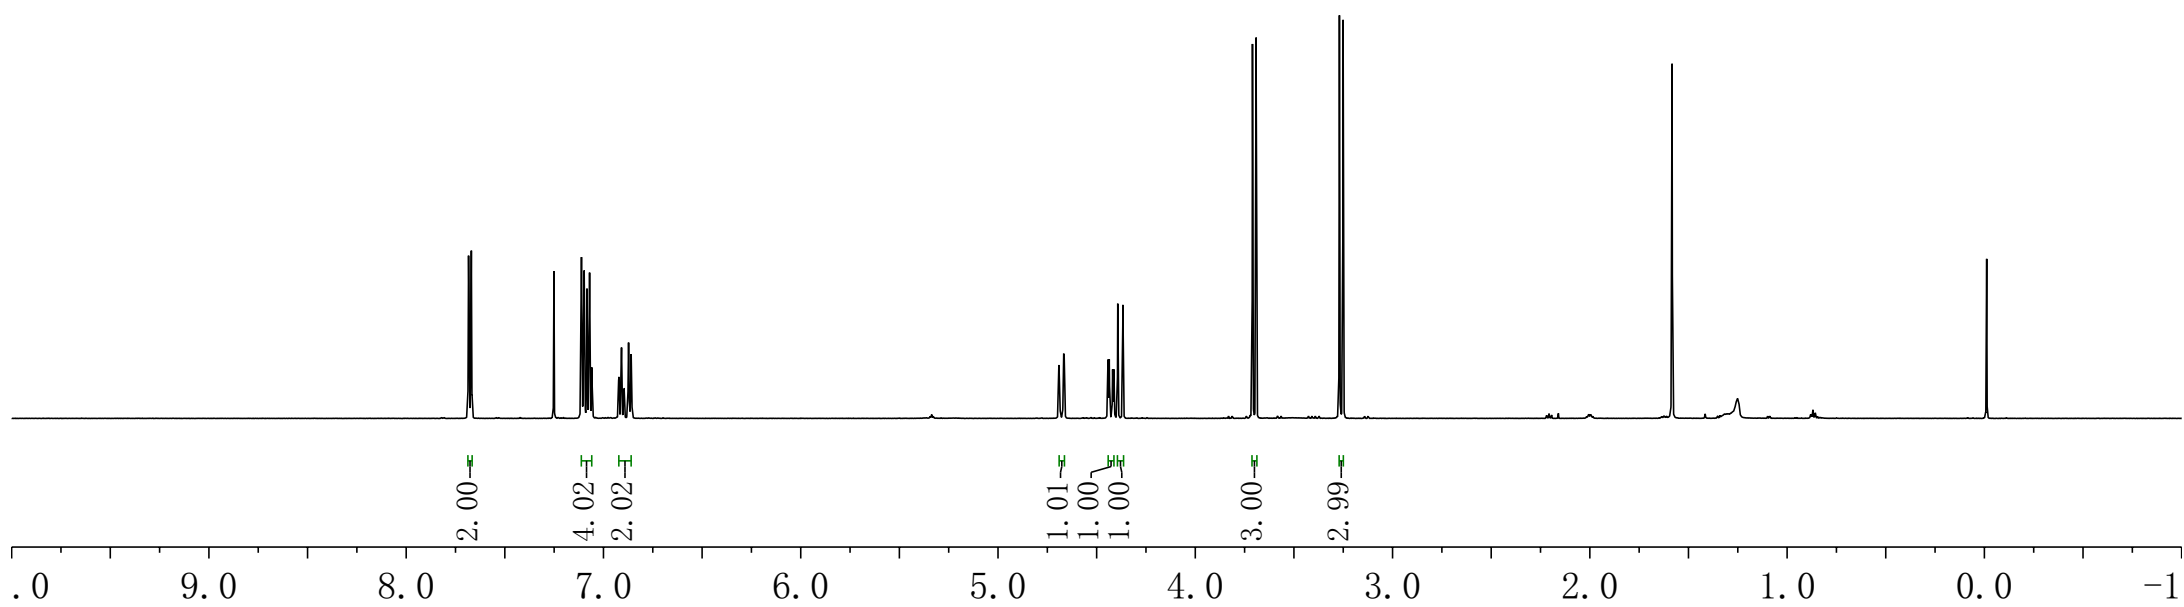

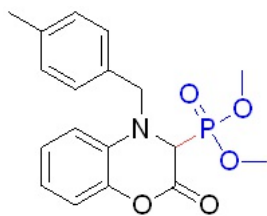

**3ja**

7.2782  
7.2585  
7.1900  
7.1707  
7.1364  
7.1140  
7.1076  
7.1041  
7.0978  
7.0945  
7.0877  
6.9863  
6.9663  
6.9426  
6.9227  
6.9041

4.7318  
4.6977  
4.4853  
4.4744  
4.4474  
4.4402  
4.4079

3.7202  
3.6925

3.3148  
3.2872

-2.3664

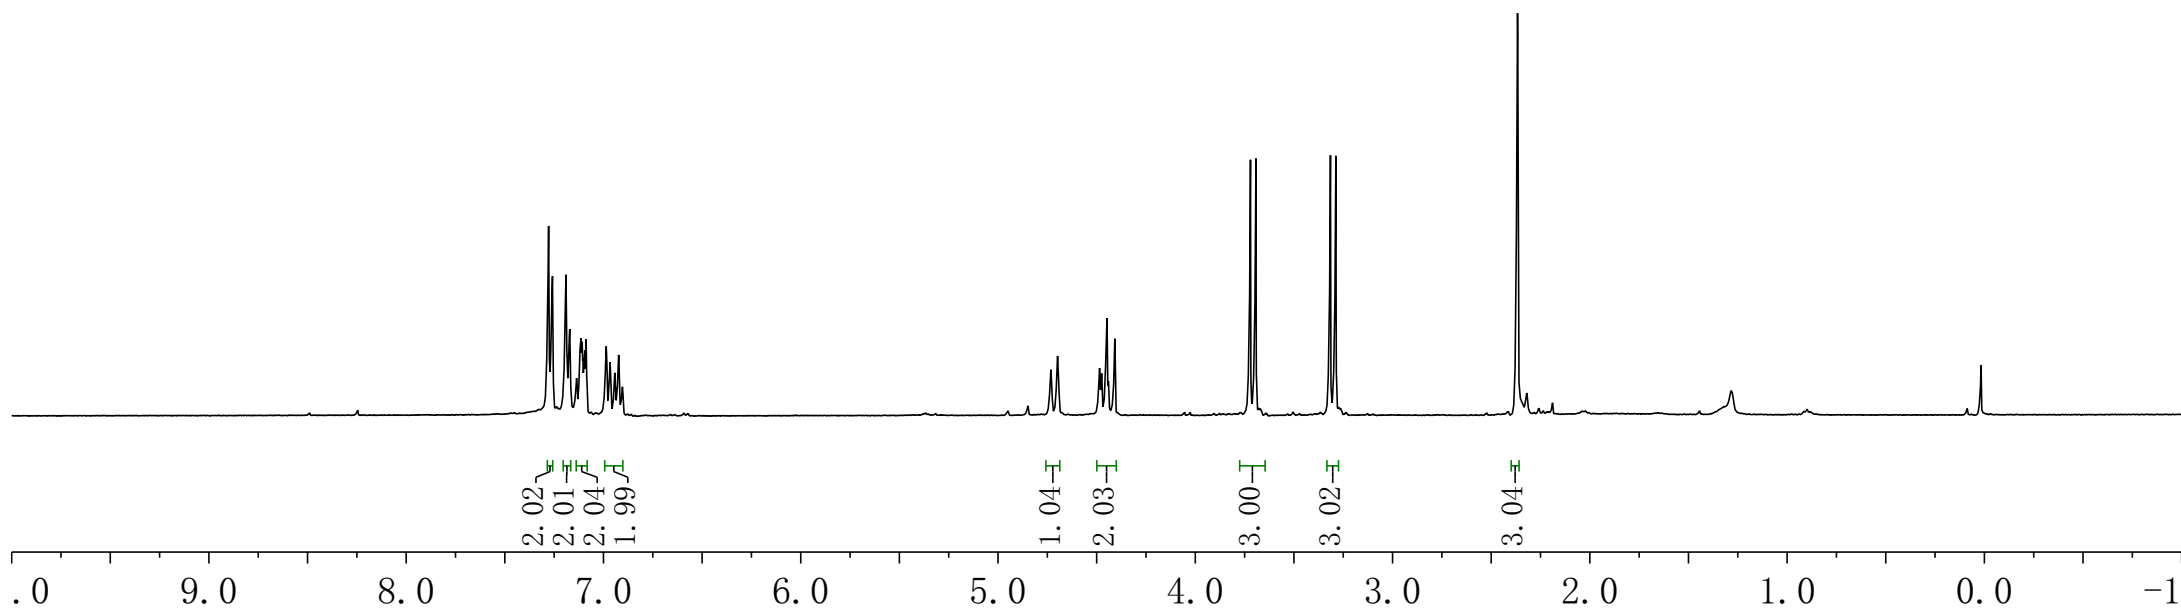

7.2852  
7.2823  
7.2728  
7.2625  
7.2601  
7.2570  
7.2005  
7.1984  
7.1882  
7.1851  
7.1505  
7.1388  
7.0792  
7.0687  
7.0665  
7.0558  
7.0534  
7.0436  
7.0413  
7.0303  
7.0280  
6.8664  
6.8540  
6.8405  
6.8188  
6.8055

4.4744  
4.4473  
3.7094  
3.6910  
3.6339  
3.6242  
3.6201  
3.6149  
3.6105  
3.6063  
3.2908  
3.2724  
3.1970  
3.1935  
3.1845  
3.1825  
3.1736  
3.1700  
2.7001  
2.6874  
2.6768  
2.6742  
2.6633  
2.6561  
2.6435  
2.6310  
2.6201  
2.0304  
2.0176  
2.0054  
1.9944  
1.9712  
1.9620  
1.9590  
1.9498  
1.9364

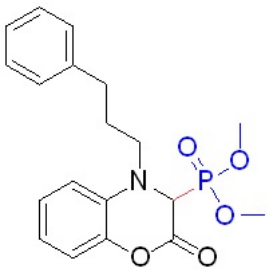

**3ka**

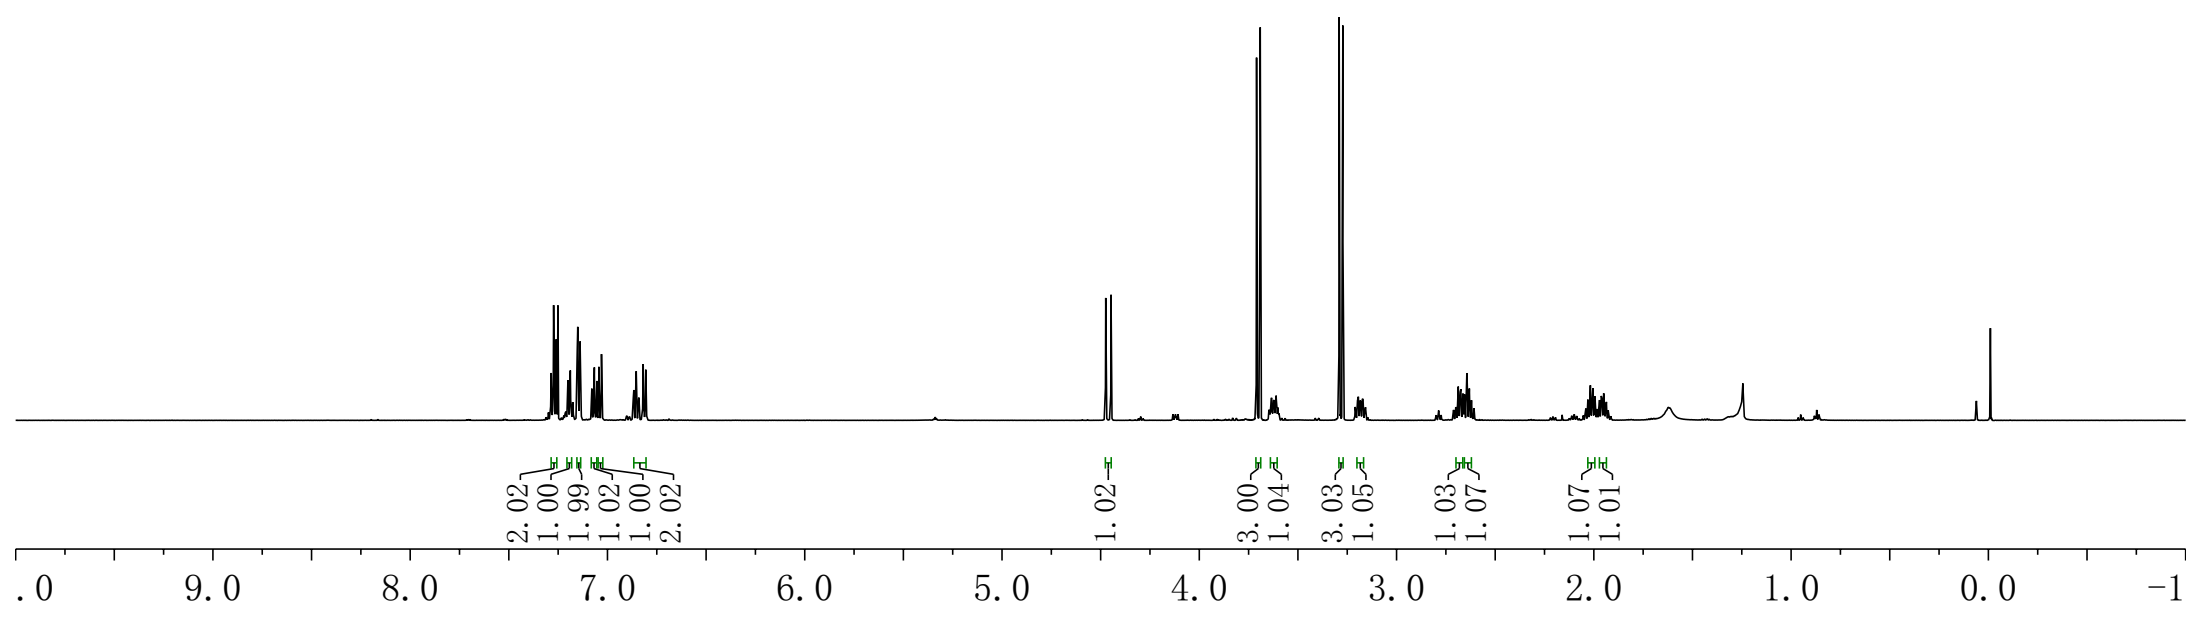

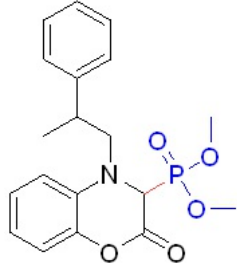

3la

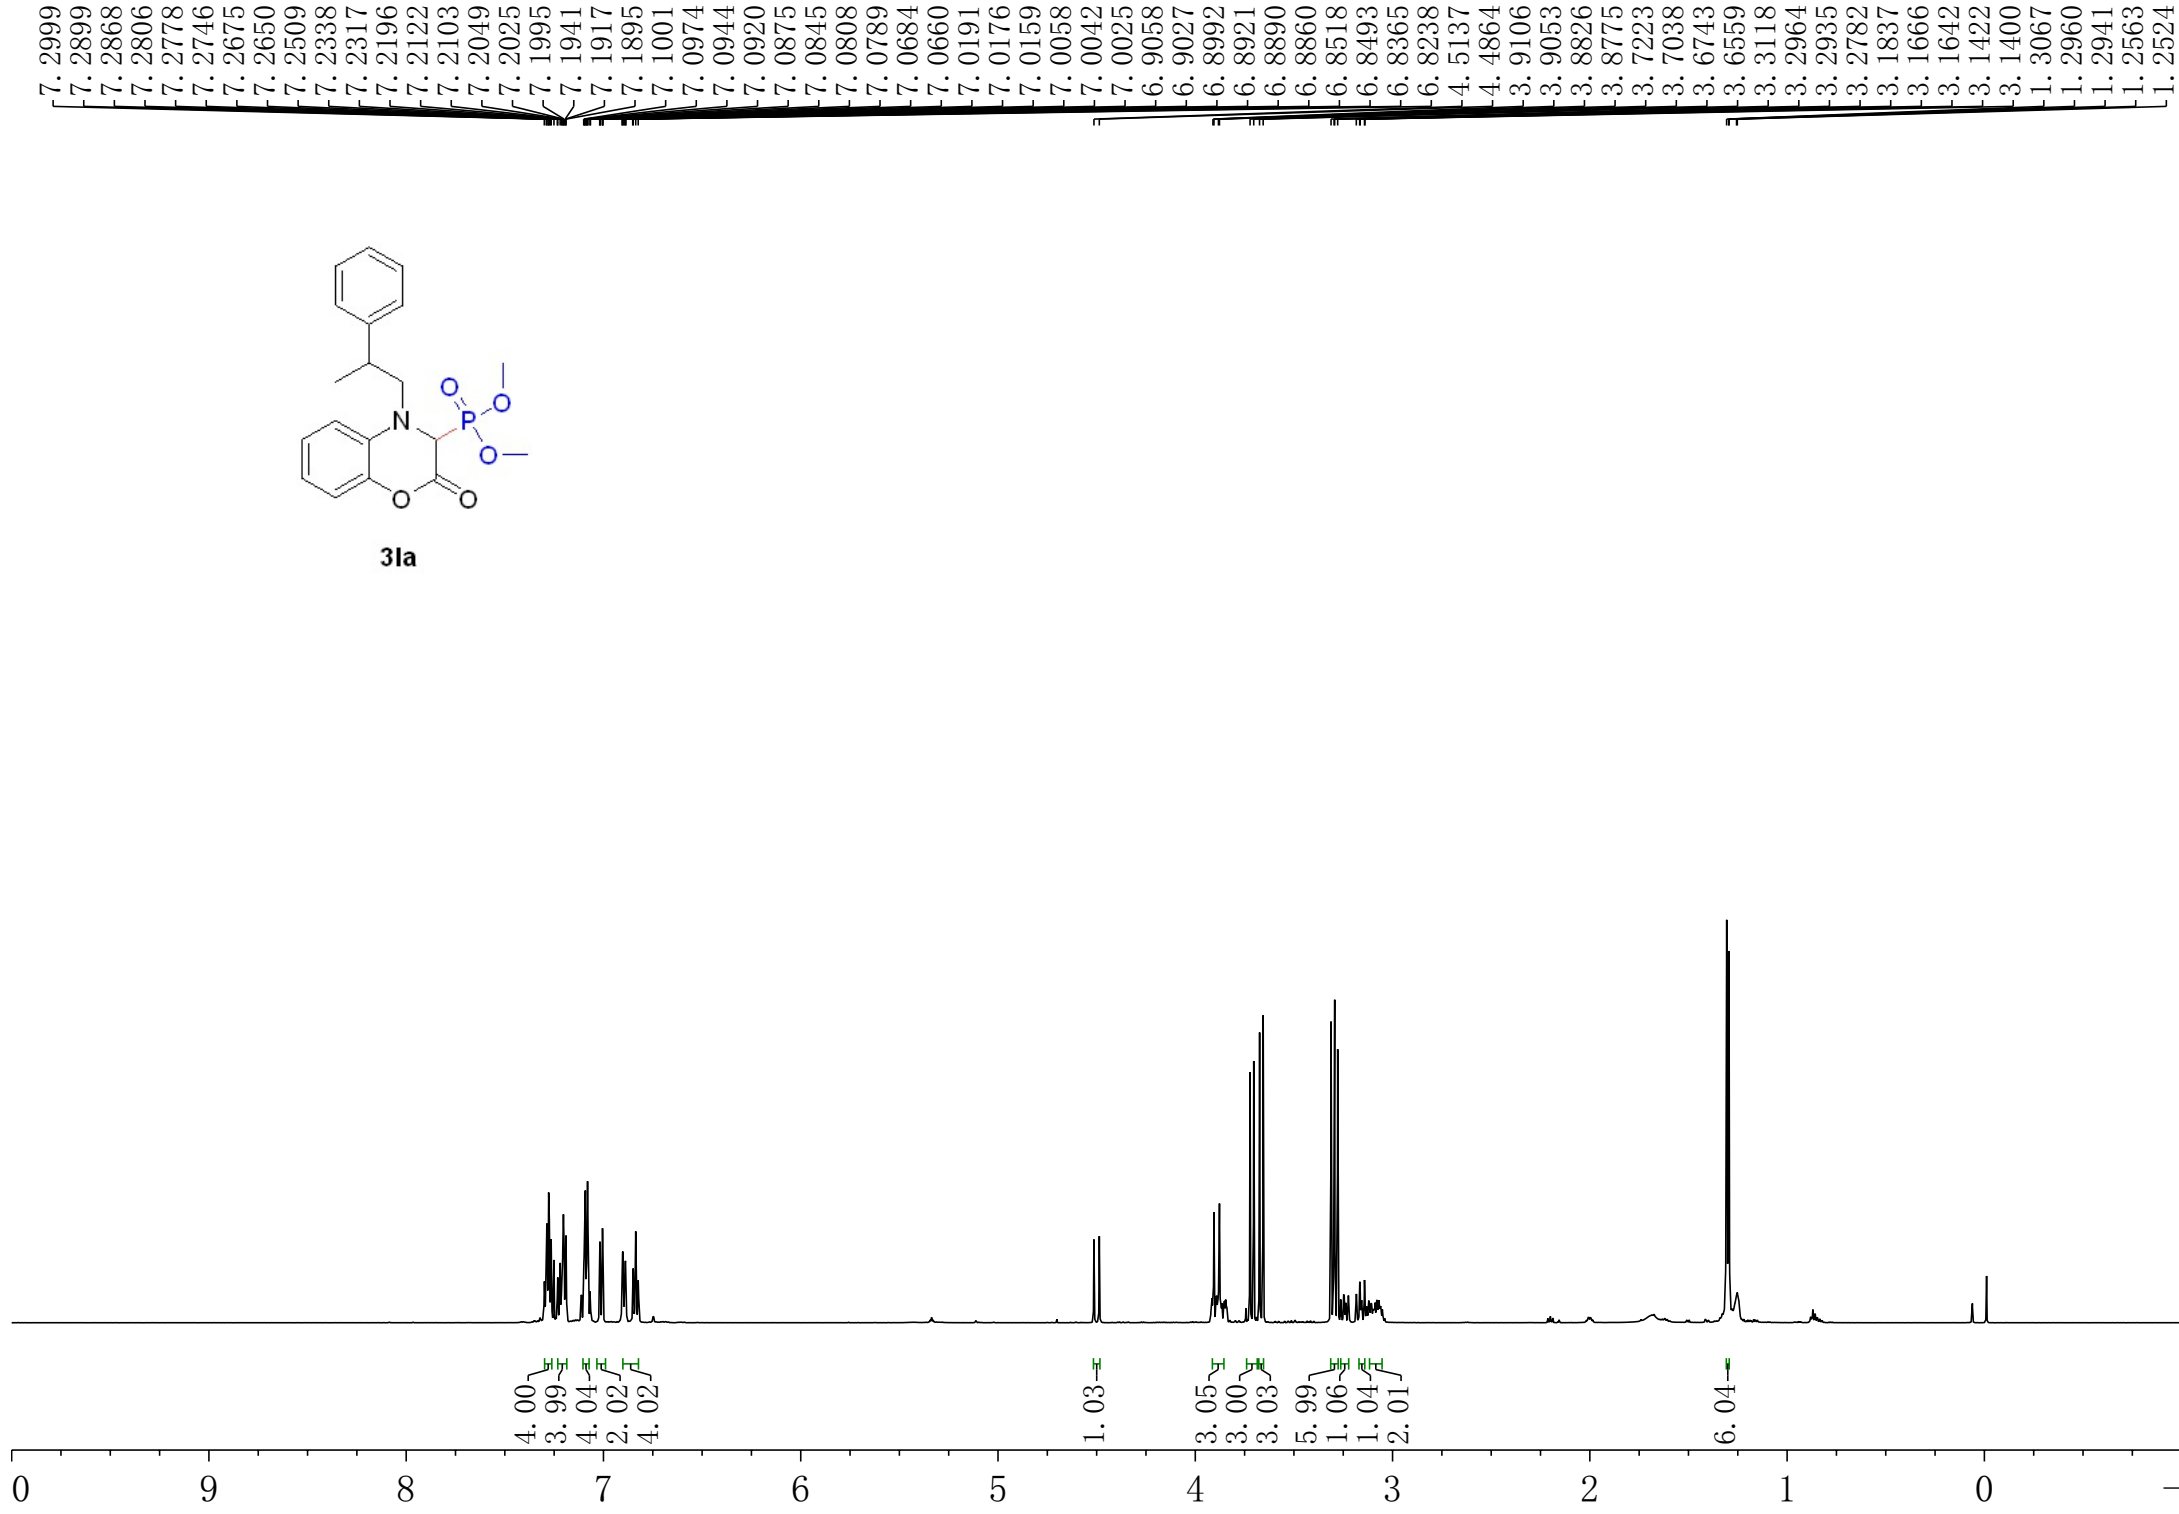



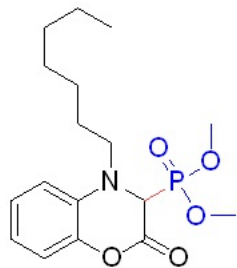

**3ma**

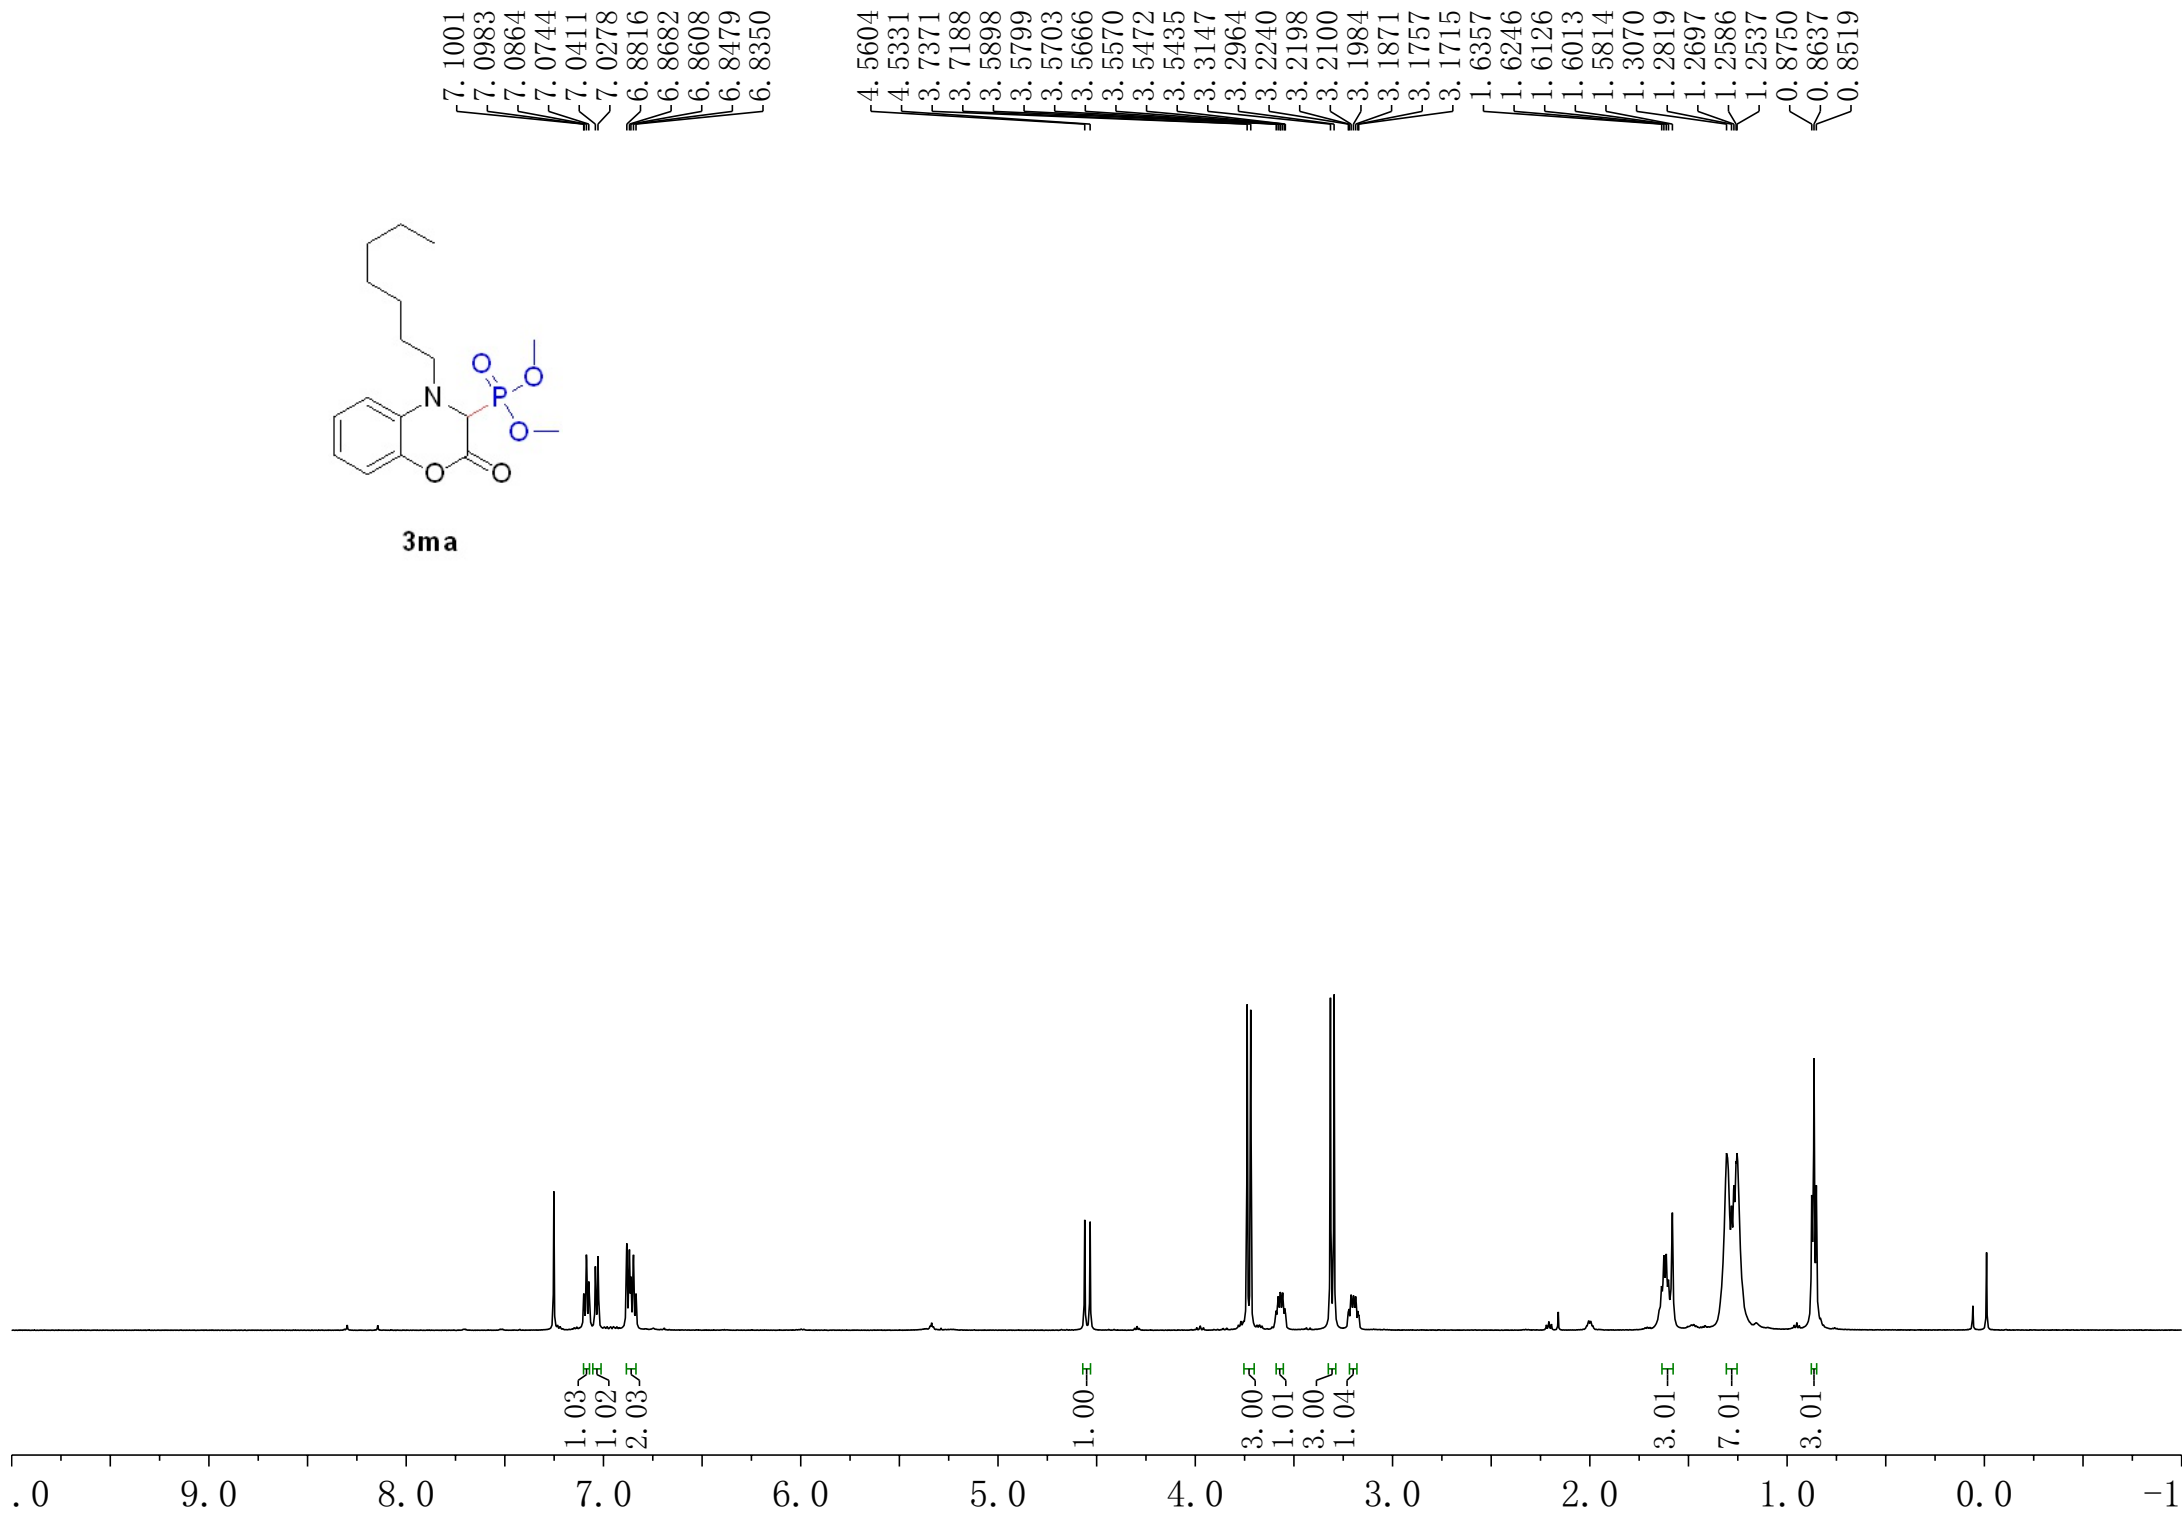

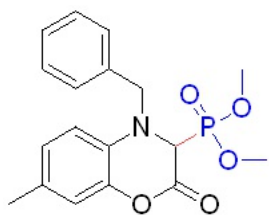

**3na**

7.3430  
7.3357  
7.3158  
7.3092  
7.3025  
7.2953  
7.2884  
6.8924  
6.8875  
6.8734  
6.8211  
6.8077

4.7063  
4.6830  
4.4563  
4.4492  
4.4330  
4.4259  
4.3965  
4.3700  
3.6891  
3.6707  
3.3170  
3.2987

-2.2833

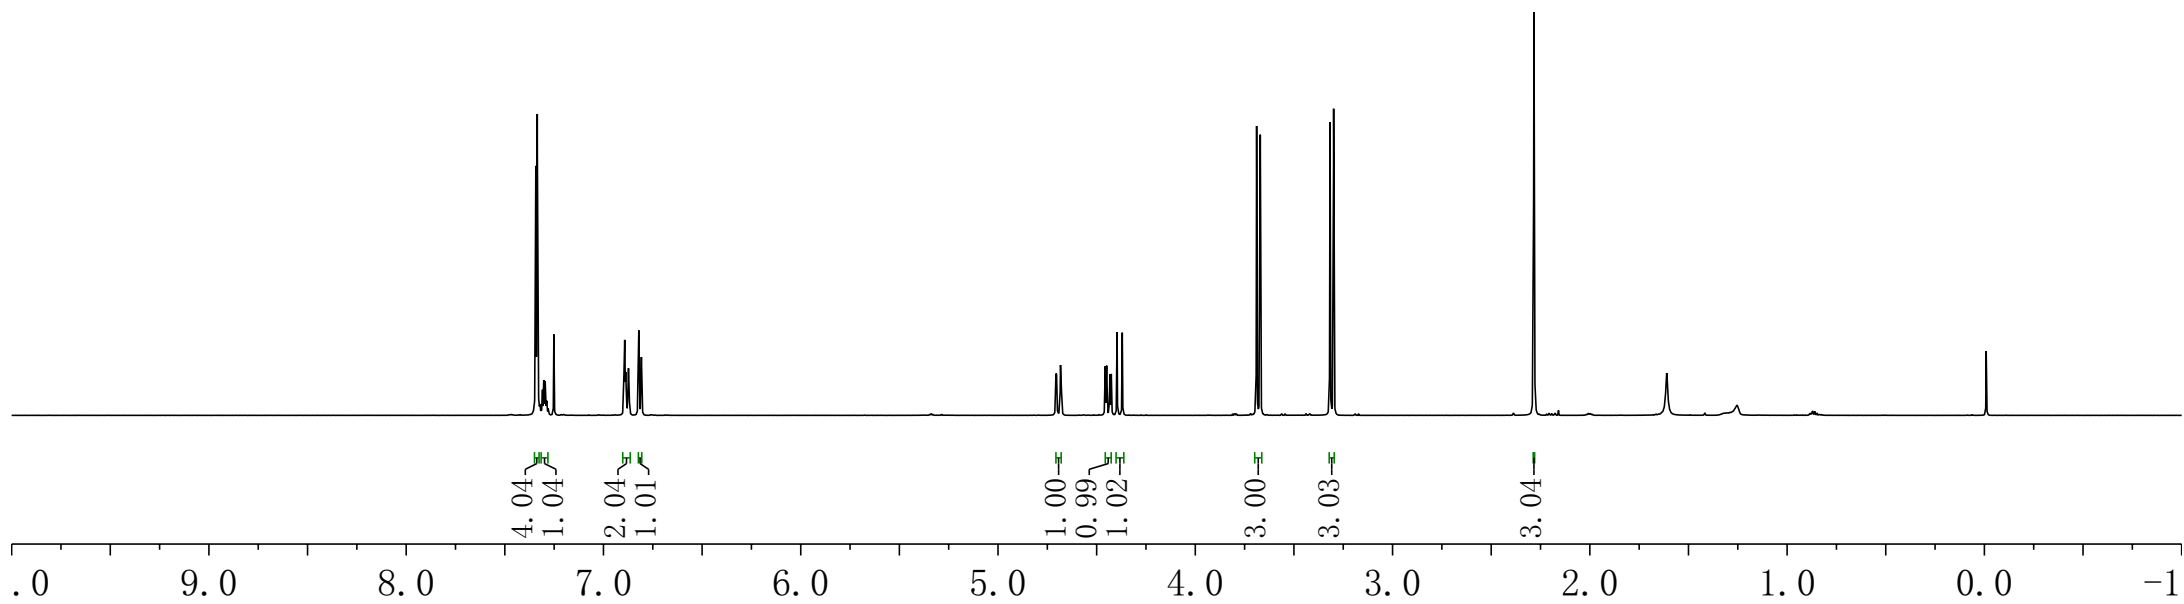

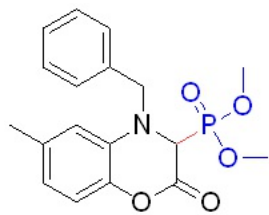

30a

7.3564  
7.3491  
7.3233  
7.3169  
7.3094  
7.3027  
6.9588  
6.9453  
6.7647  
6.7019  
6.6883

4.7365  
4.7135  
4.4747  
4.4671  
4.4517  
4.4441  
4.3740  
4.3478  
3.6865  
3.6680  
3.3069  
3.2885

-2.2920

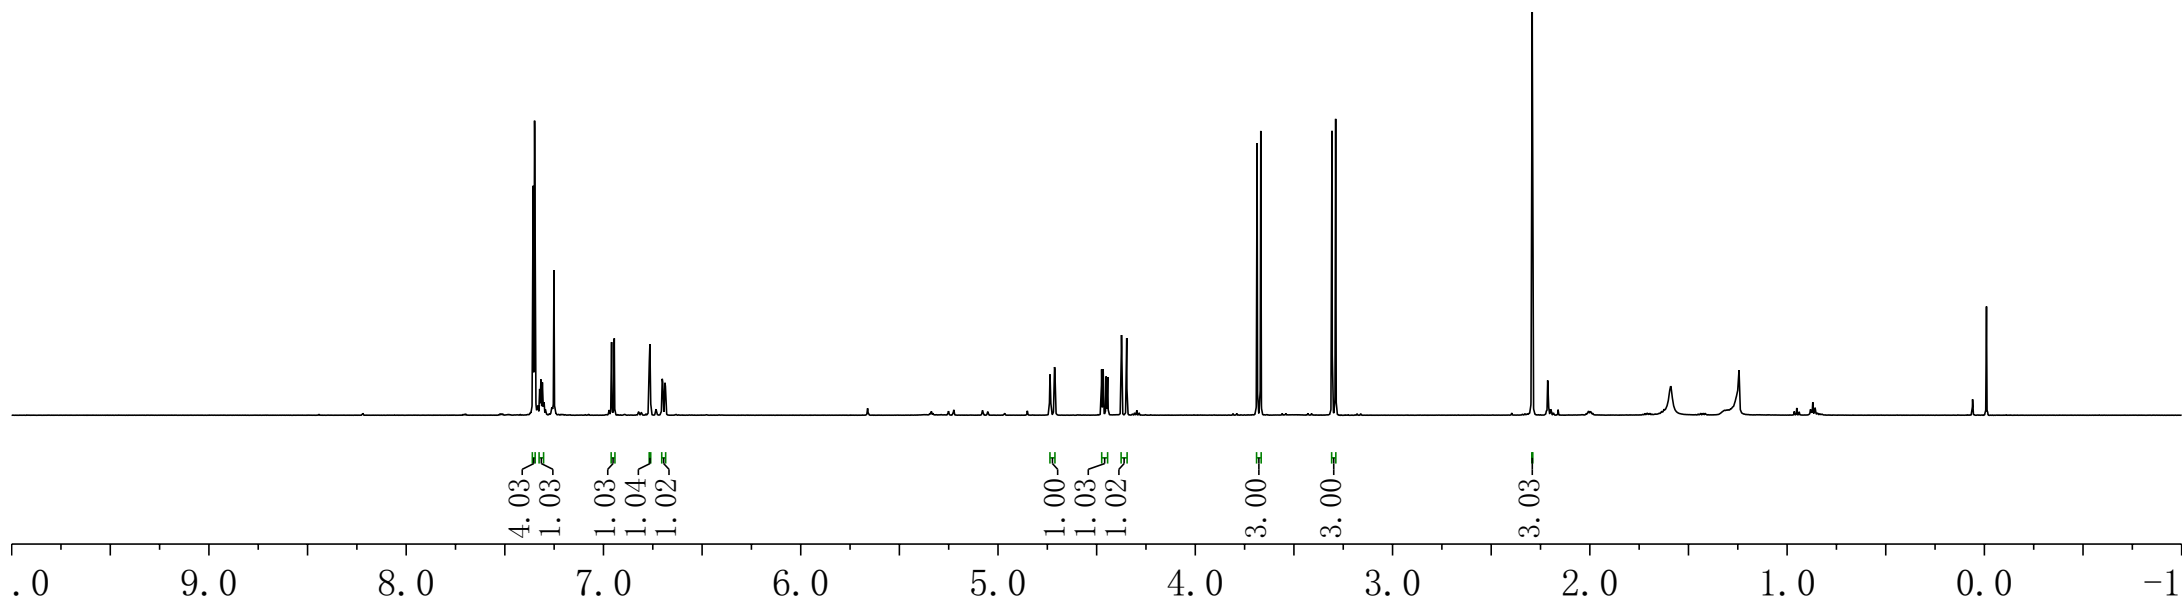

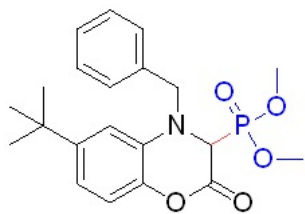

**3pa**

7.3734  
7.3622  
7.3601  
7.3565  
7.3557  
7.3438  
7.3410  
7.3335  
7.3098  
7.3070  
7.3038  
7.2994  
7.2953  
7.2912  
6.9904  
6.9766  
6.9178  
6.9148  
6.9104  
6.9070  
6.8965  
6.8932

4.7693  
4.7461  
4.4938  
4.4869  
4.4706  
4.4638  
4.4308  
4.4044

3.6833  
3.6648  
3.2489  
3.2306

-1.2419

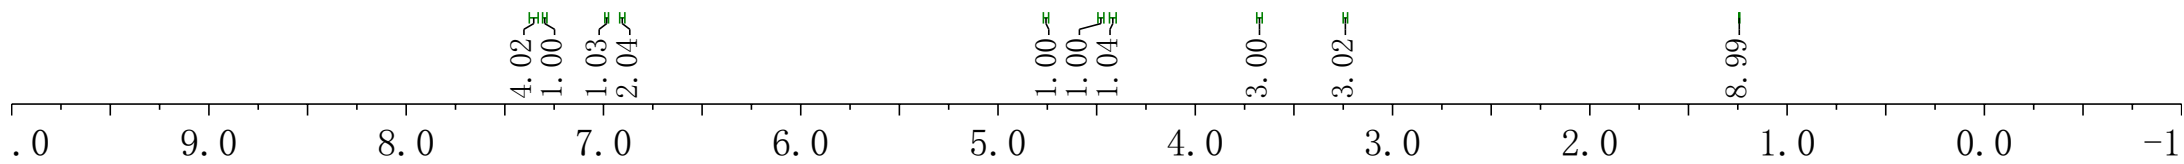

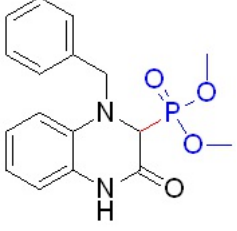

**3ra**

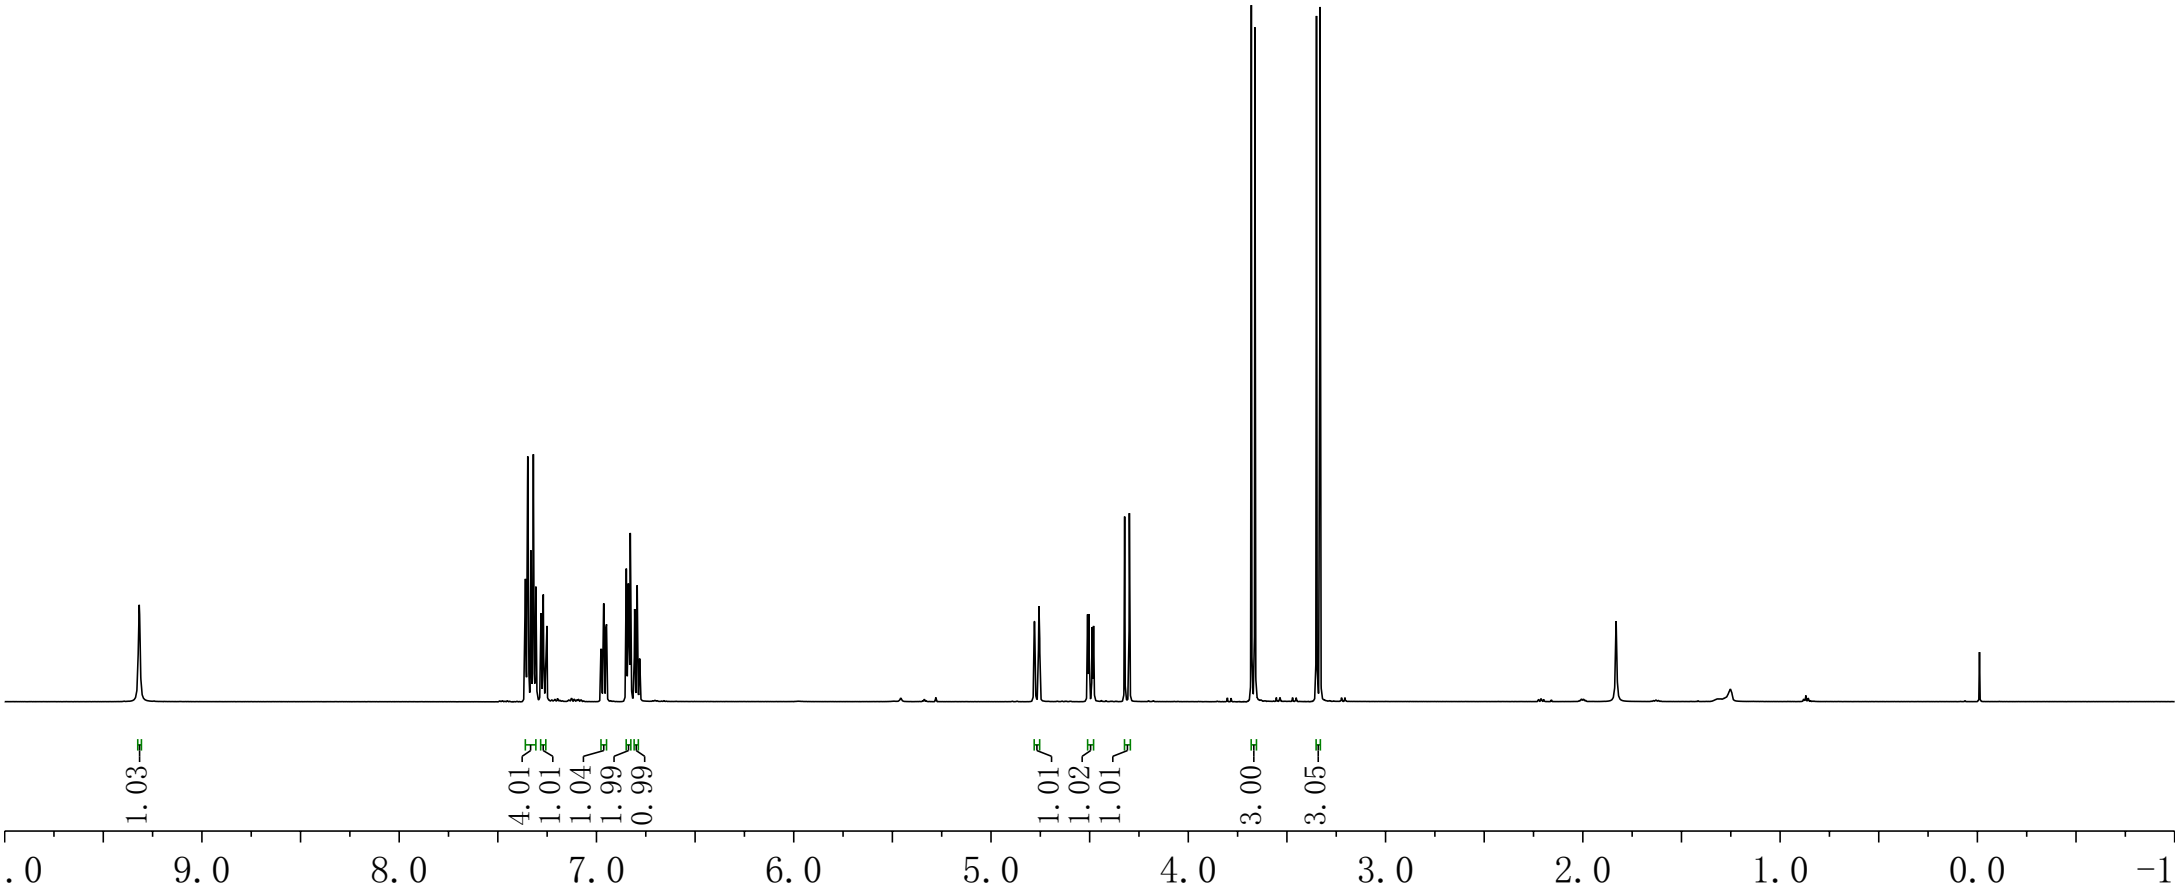

9.3176  
7.3601  
7.3484  
7.3321  
7.3201  
7.3074  
7.2812  
7.2790  
7.2730  
7.2694  
7.2574  
6.9774  
6.9748  
6.9638  
6.9624  
6.9518  
6.9492  
6.8486  
6.8413  
6.8385  
6.8354  
6.8285  
6.8259  
6.8060  
6.7937  
4.7792  
4.7568  
4.5105  
4.5038  
4.4868  
4.4801  
4.3227  
4.2986  
3.6803  
3.6620  
3.3502  
3.3320

161.90  
161.86

142.20

135.02

133.10

128.95

128.52

128.19

125.54

120.56

116.49

114.16

114.15

57.85

56.98

53.33

53.28

53.07

53.02

52.51

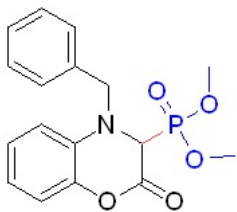

3aa

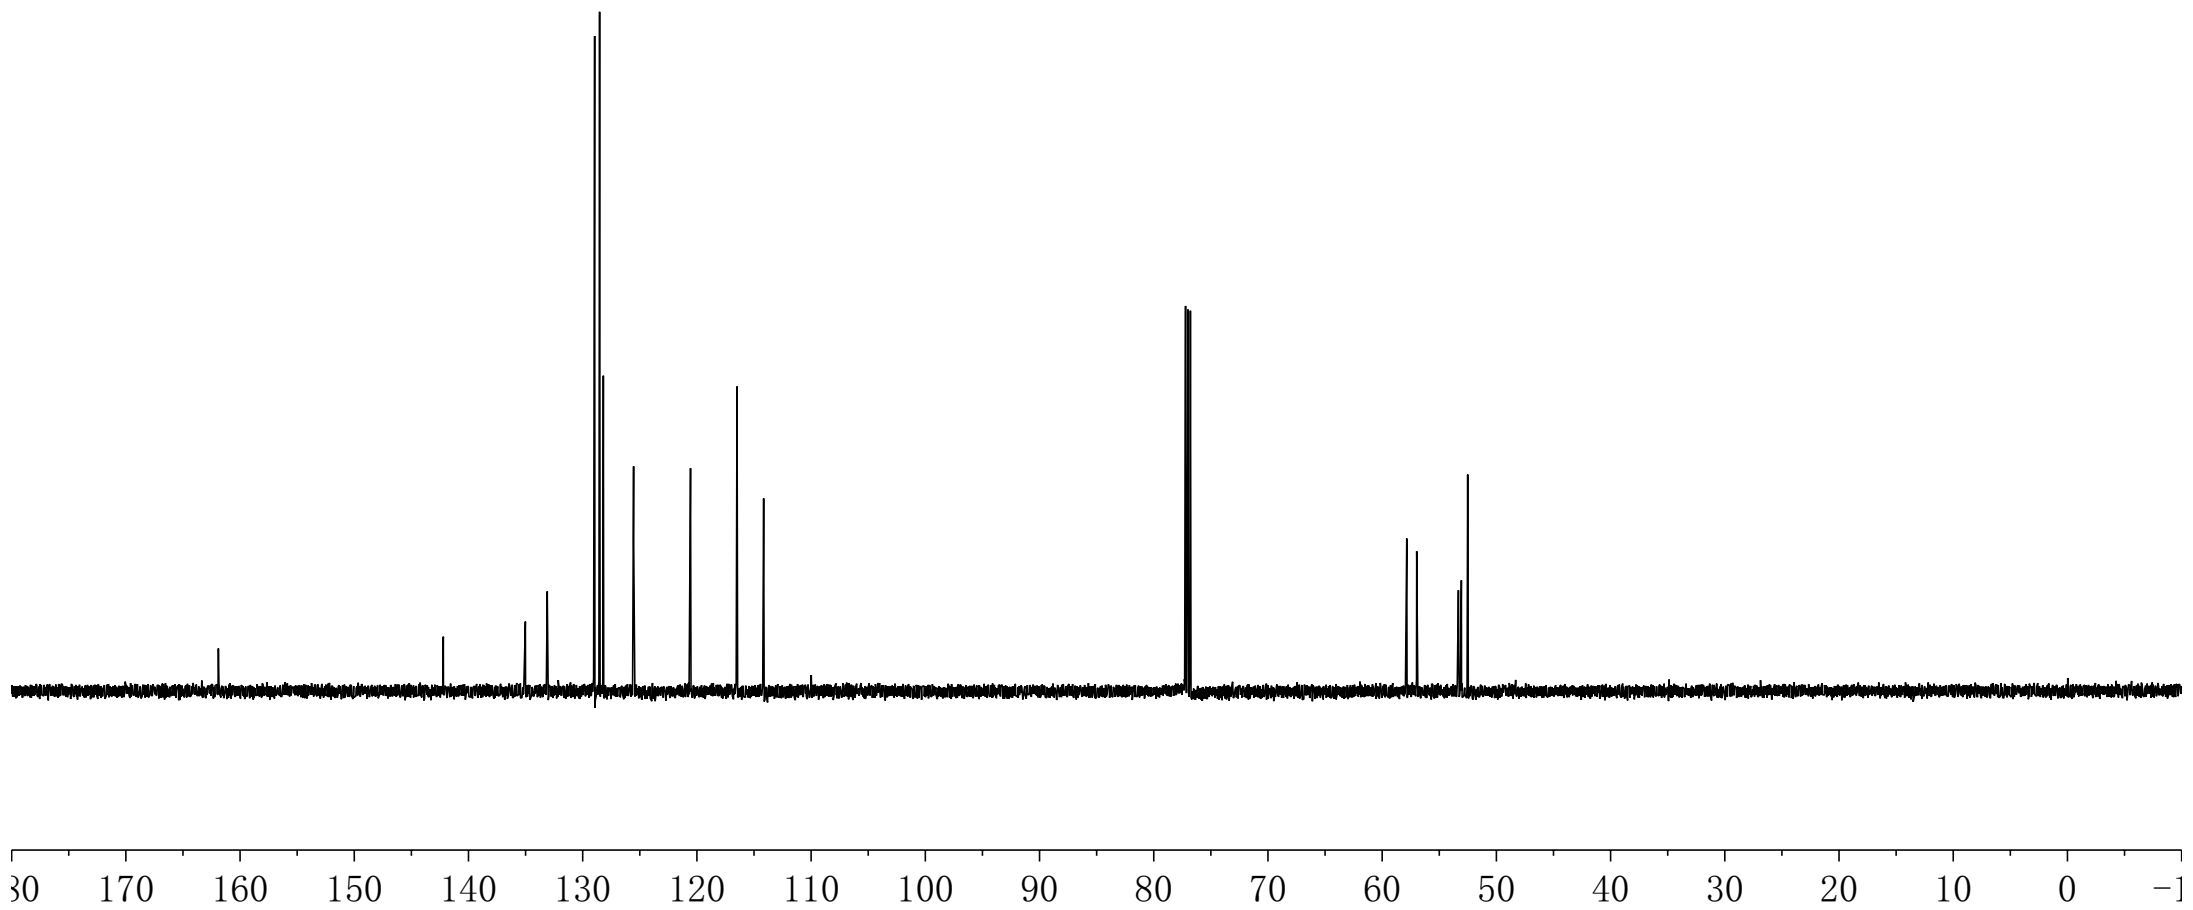

161.96  
161.92

142.28

135.20

133.17

128.90

128.48

128.10

125.38

120.28

116.35

114.02

63.35

63.31

62.79

62.75

58.26

57.39

52.48

16.24

16.20

15.99

15.95

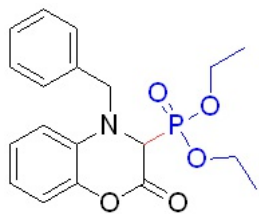

3ab

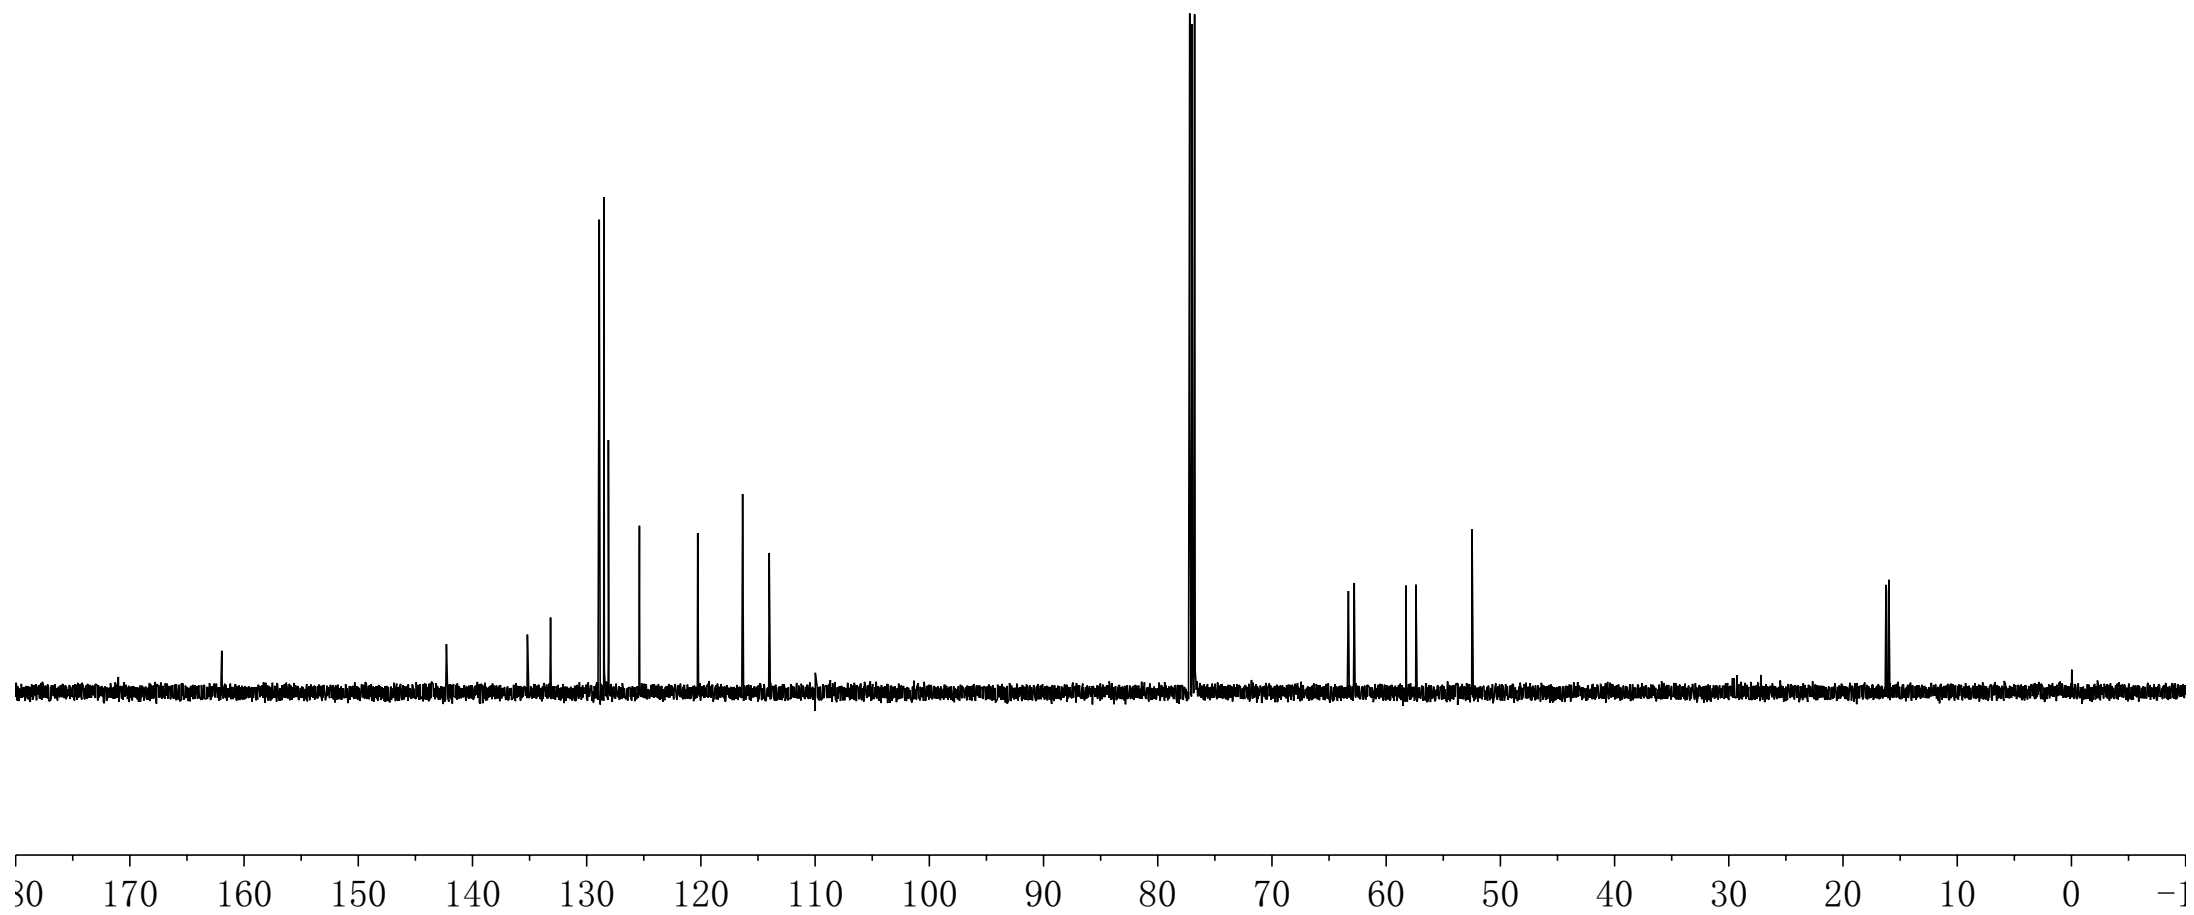

161.93  
161.90

142.33

135.36

133.21

128.85

128.49

128.01

125.20

119.98

116.26

113.87

113.86

72.54

72.49

72.19

72.13

58.86

57.98

52.39

23.99

23.96

23.83

23.80

23.64

23.61

23.22

23.18

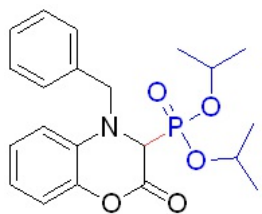

3ac

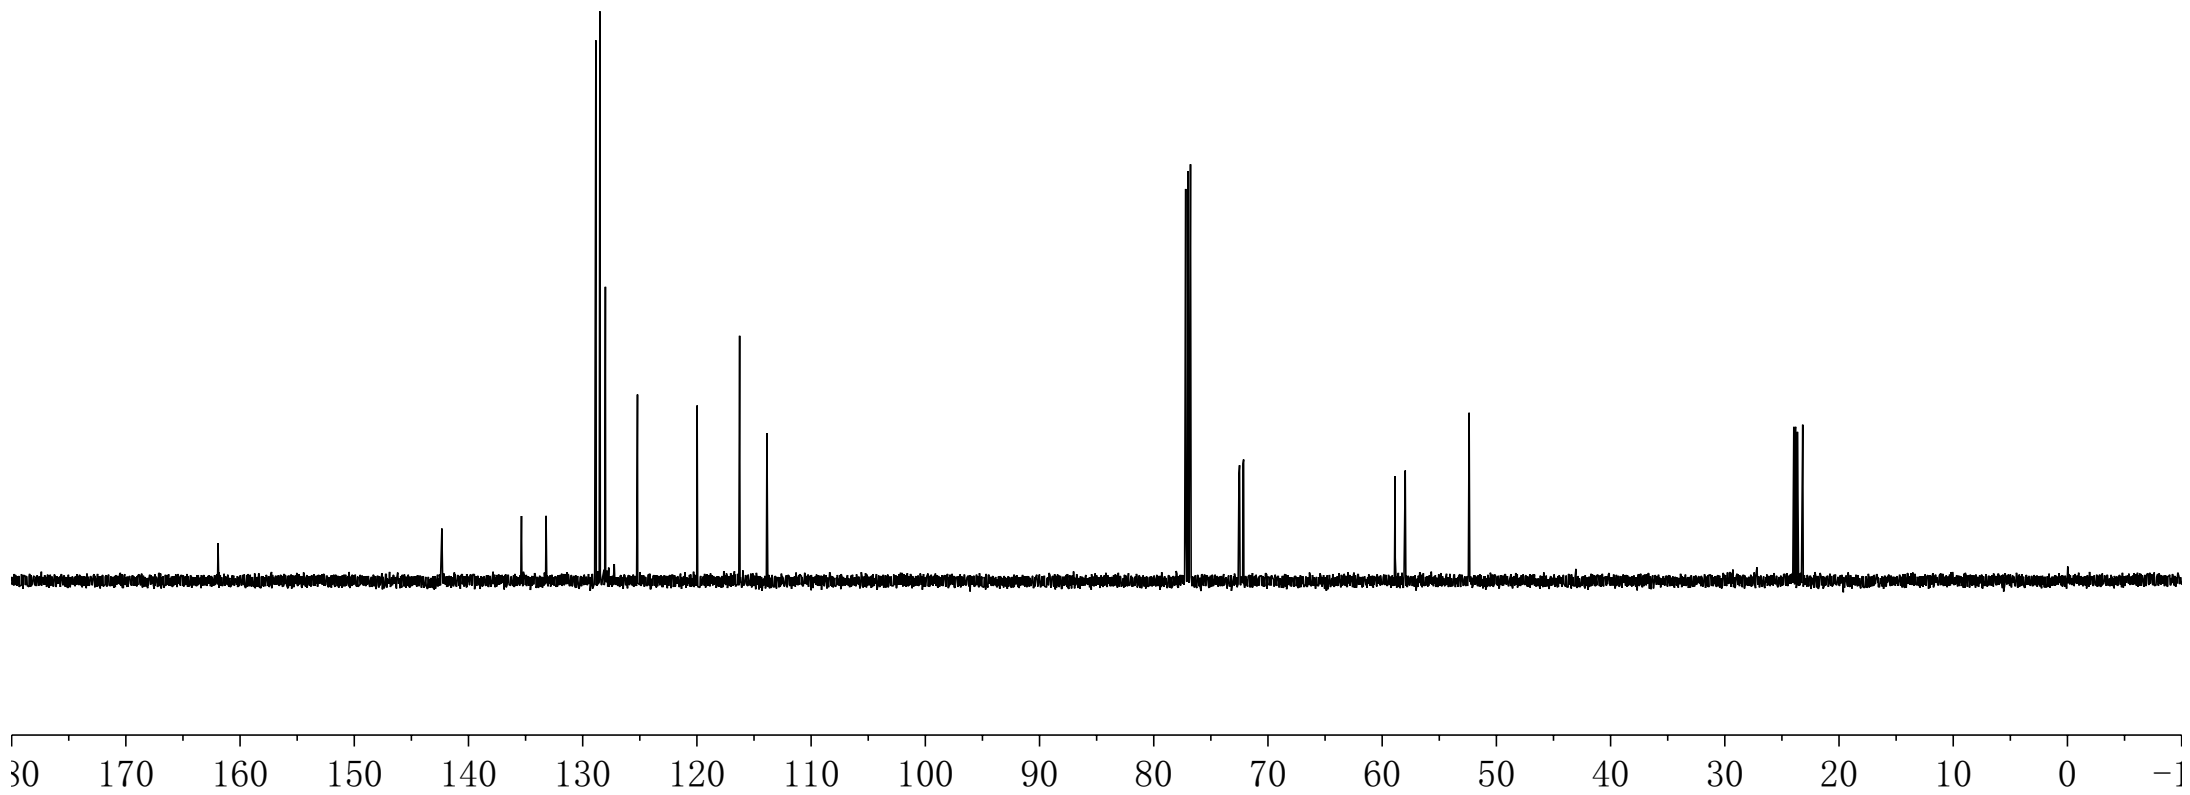



161.91  
161.87

142.22

135.21

133.15

128.89

128.50

128.09

125.38

120.21

116.36

113.99

67.06

67.01

66.38

66.33

58.13

57.25

52.44

32.32

32.28

32.14

32.10

18.51

18.41

13.48

13.42

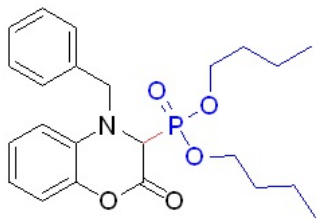

**3ad**

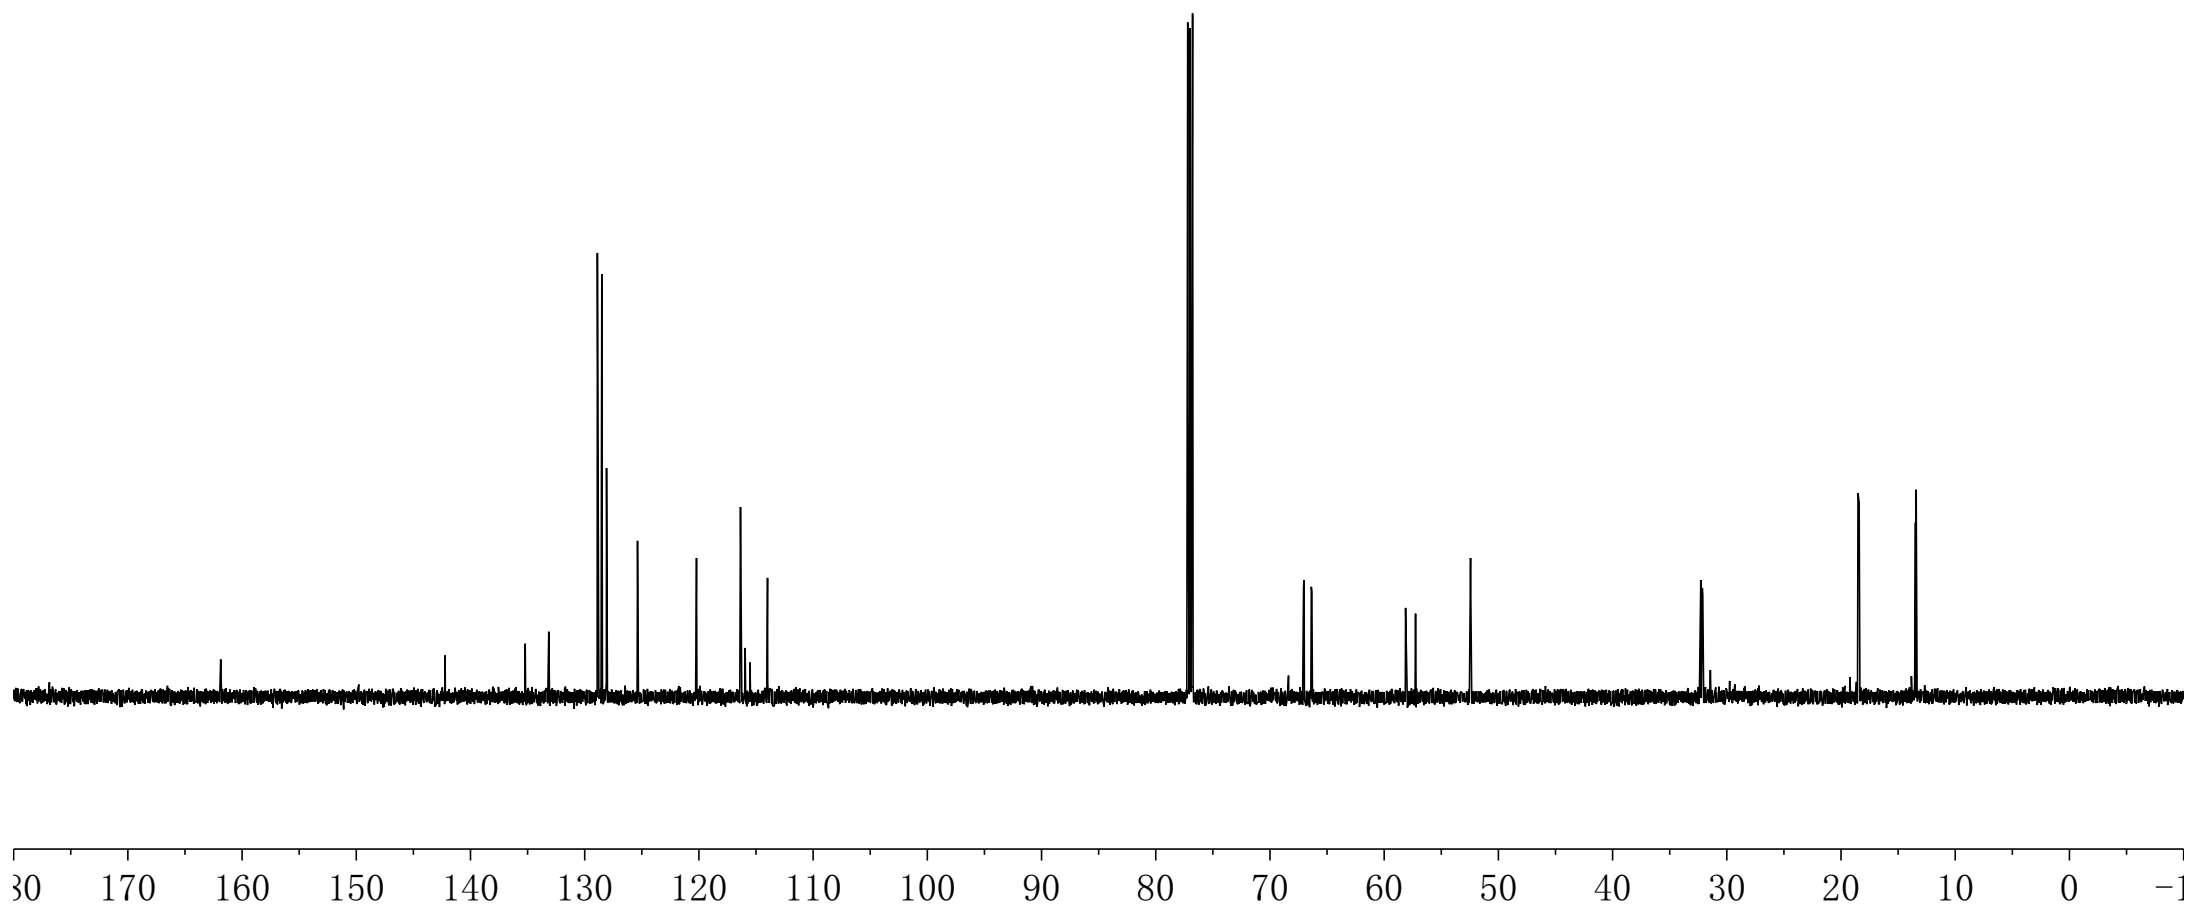

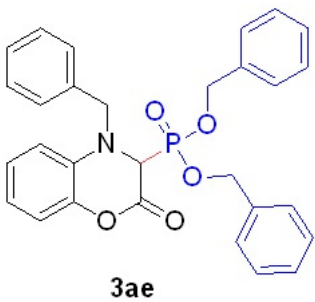

161.70  
142.21  
135.07  
133.01  
128.92  
128.61  
128.56  
128.48  
128.44  
128.43  
128.11  
128.06  
128.01  
127.91  
125.45  
120.50  
116.52  
114.11

68.57  
68.52  
68.02  
67.97  
58.65  
57.79  
52.55

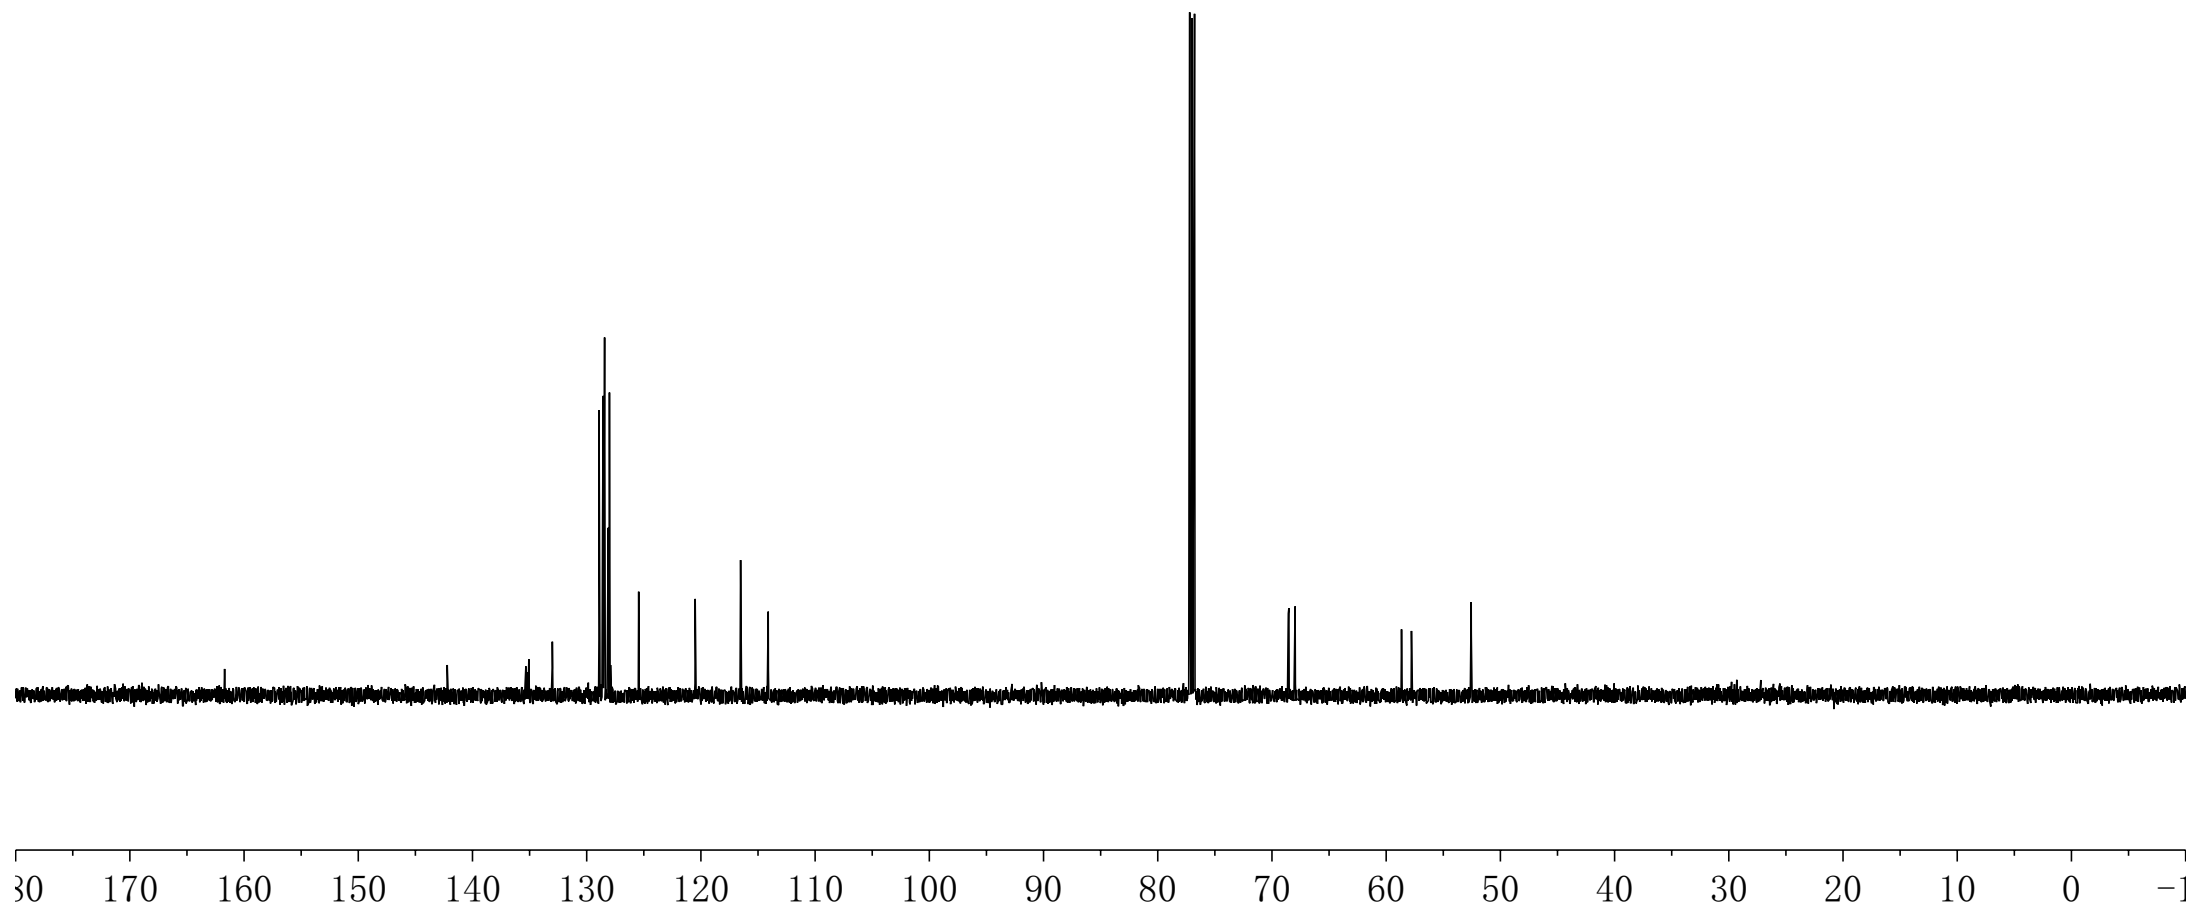

161.22  
161.18  
149.59  
149.53  
149.27  
149.20  
142.29  
134.59  
132.92  
129.88  
129.59  
128.94  
128.68  
128.17  
125.78  
125.59  
125.41  
120.81  
120.74  
120.71  
119.98  
119.95  
116.65  
114.34  
114.33

57.55  
56.69  
52.44

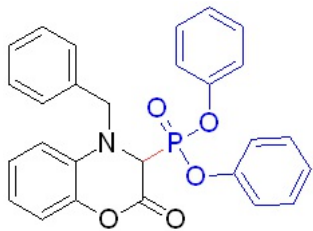

**3af**

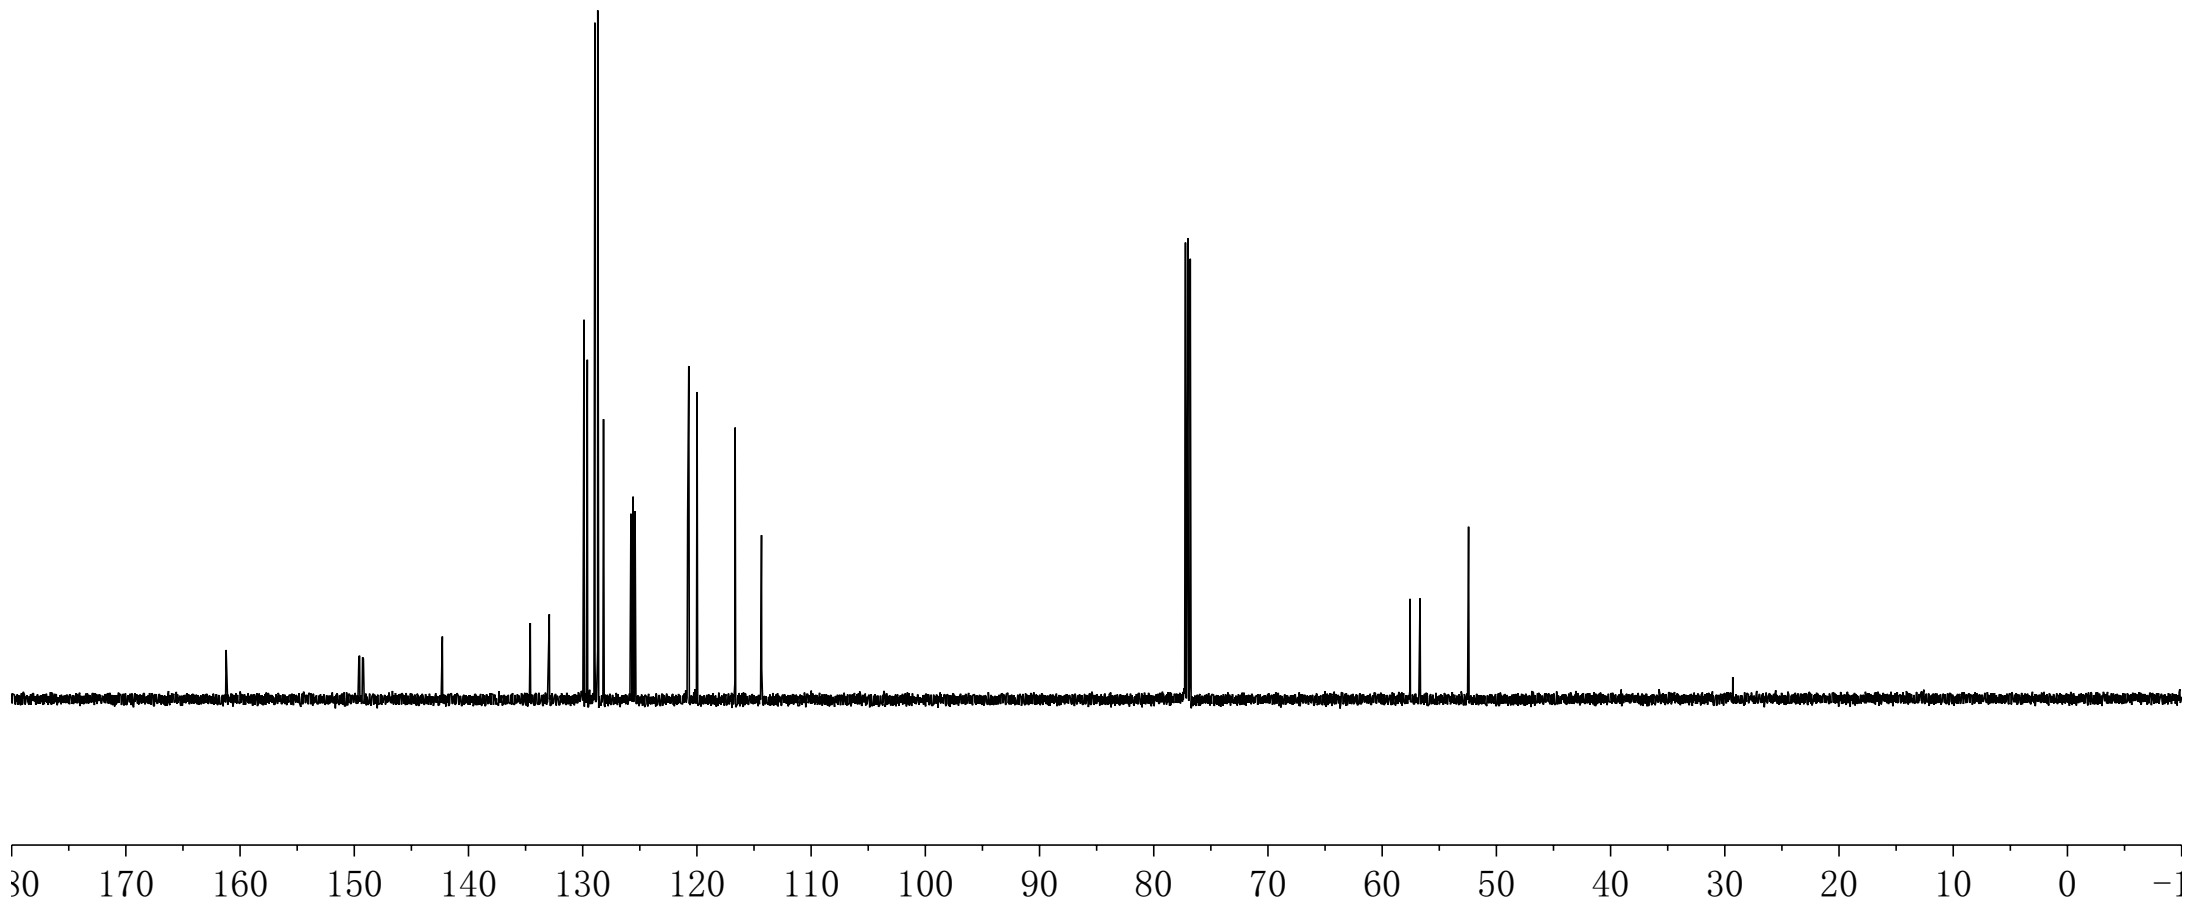

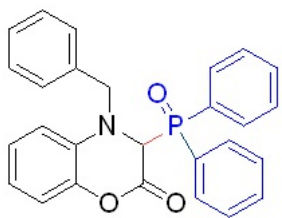

**3ag**

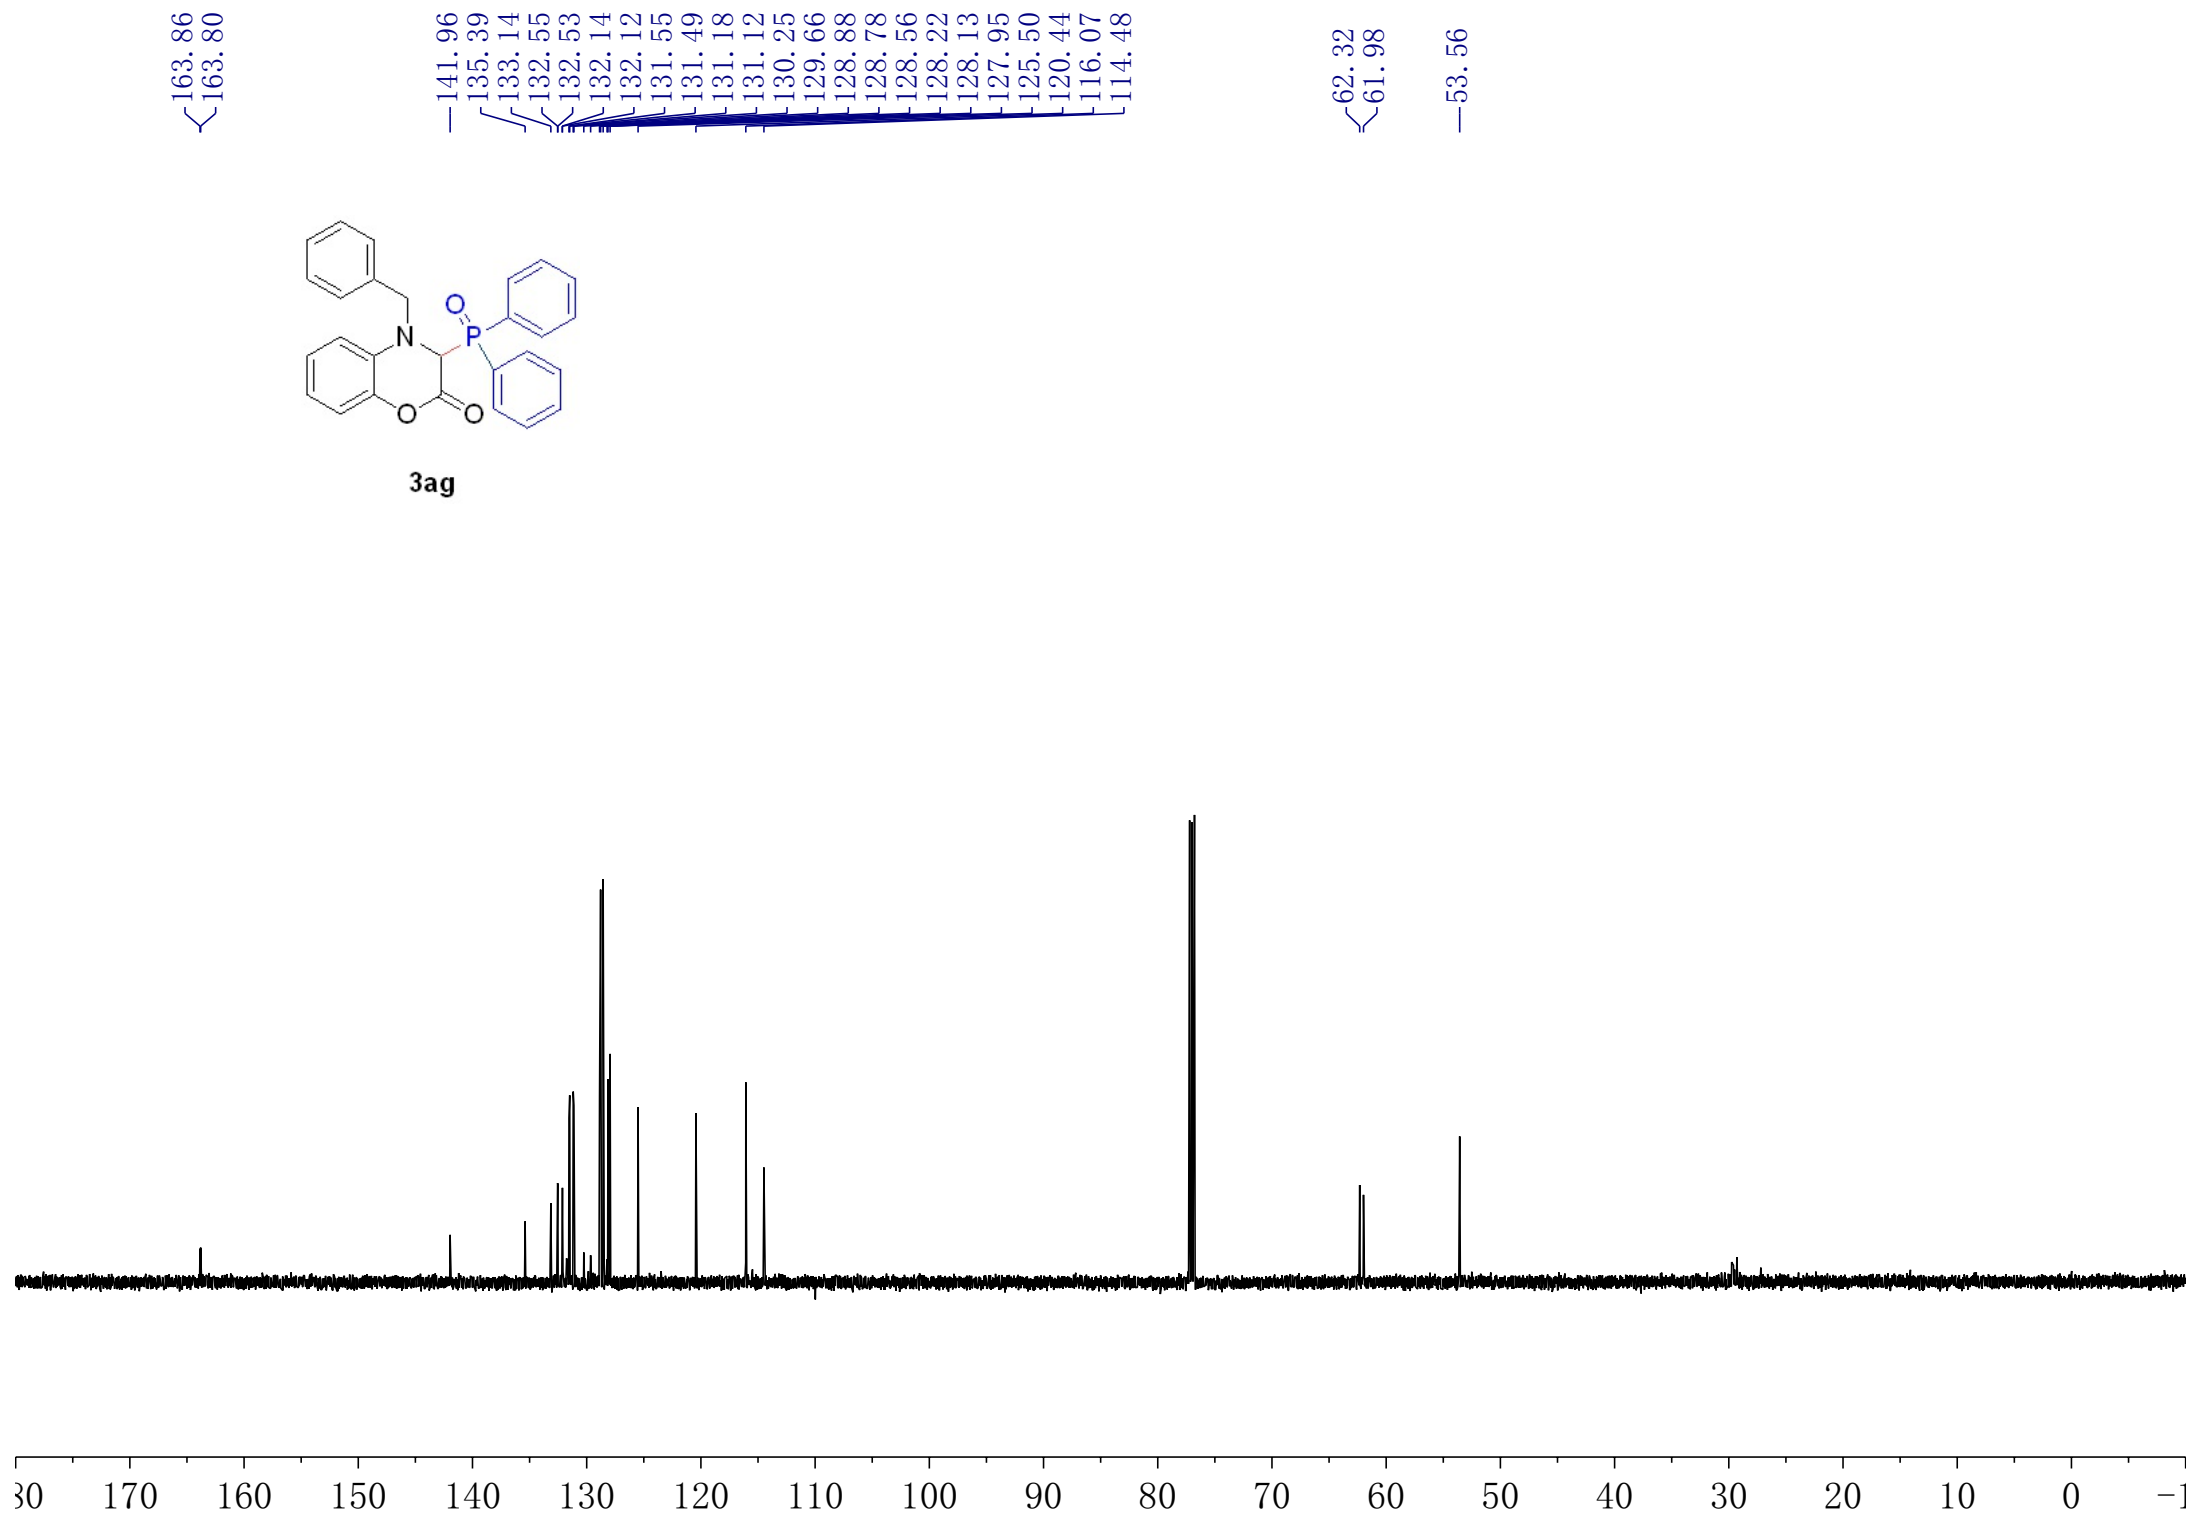

163.90  
163.84

143.11  
142.65  
141.89  
135.57  
133.20  
131.66  
131.59  
131.20  
131.14  
129.56  
129.48  
128.95  
128.86  
128.75  
128.49  
127.87  
125.42  
120.02  
116.02  
114.42

62.40  
62.06

53.52

21.65  
21.49

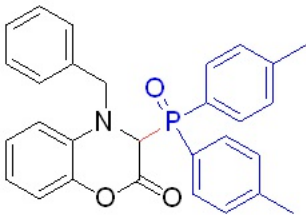

3ah

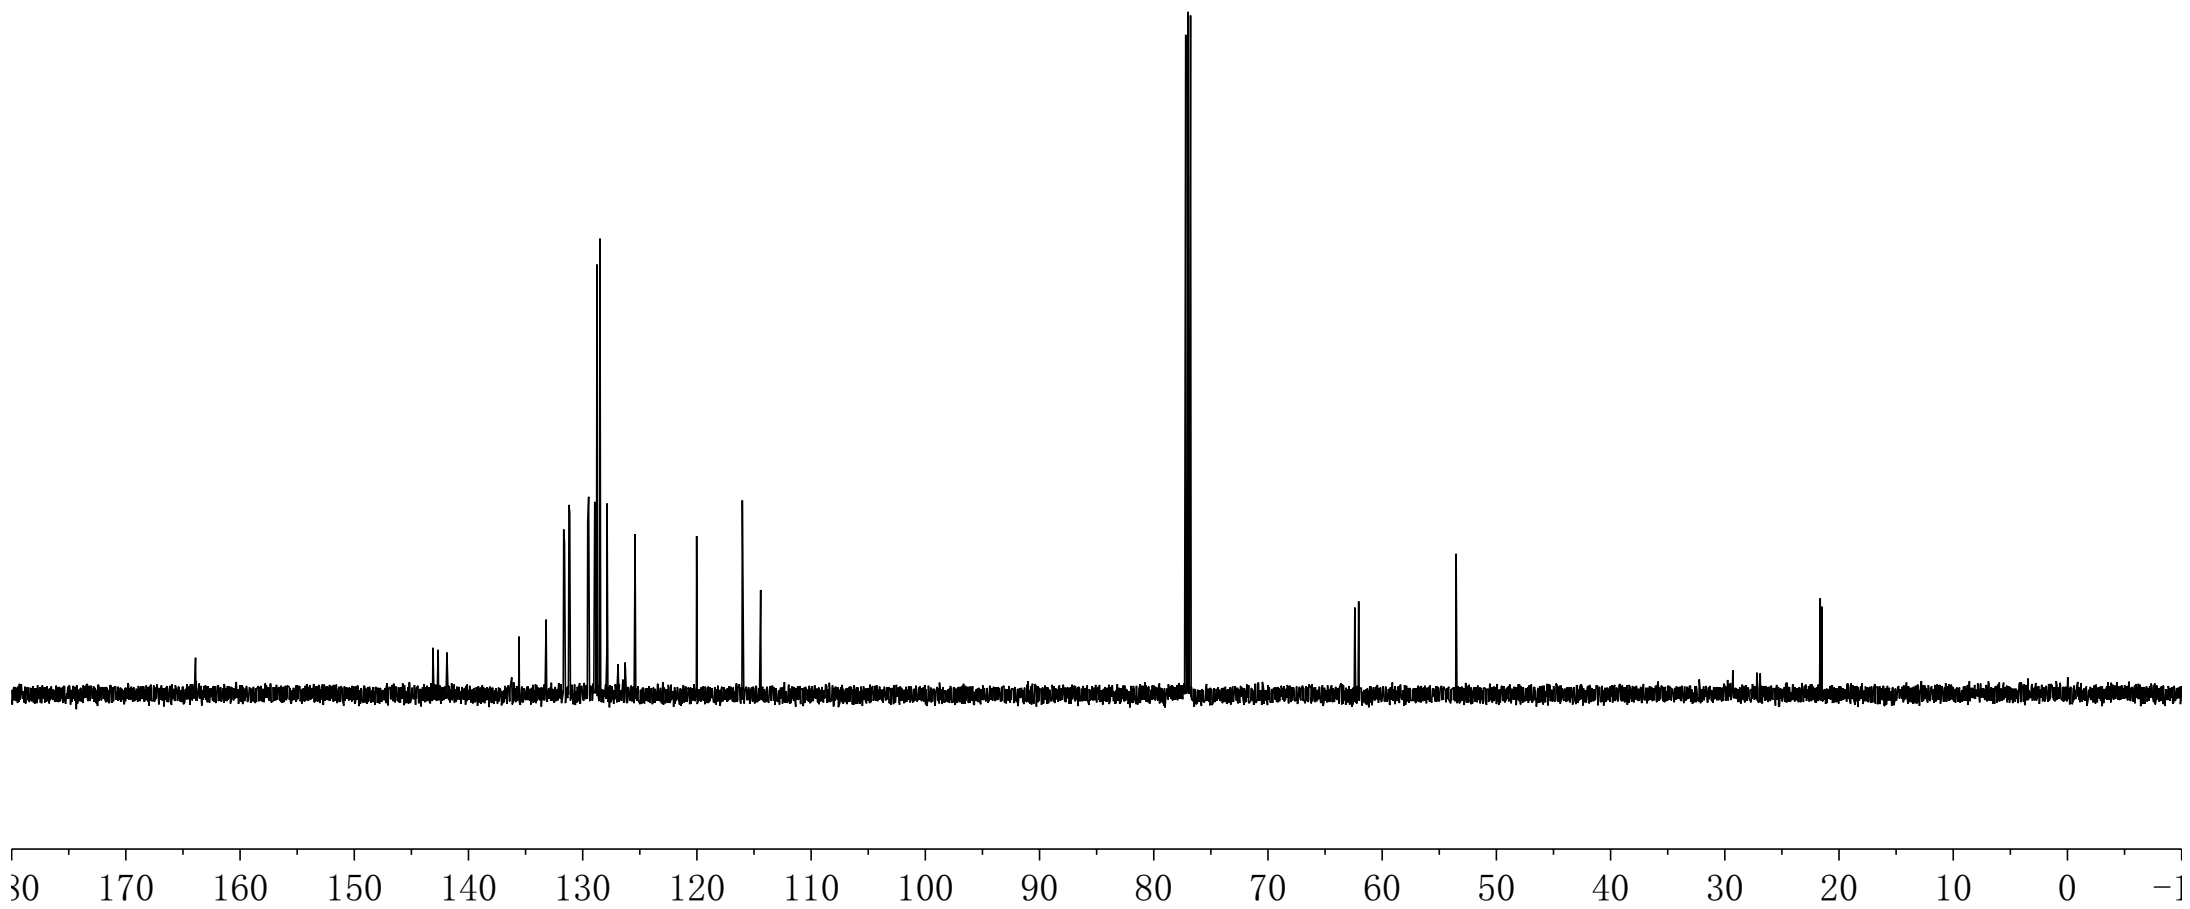

161.99  
161.95  
159.54

142.24

133.27  
130.06  
126.66  
125.53  
120.49  
116.43  
114.35  
114.14  
114.13

57.17  
56.30  
55.28  
53.31  
53.27  
53.03  
52.98  
51.83

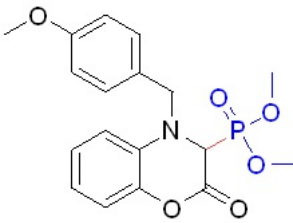

3ba

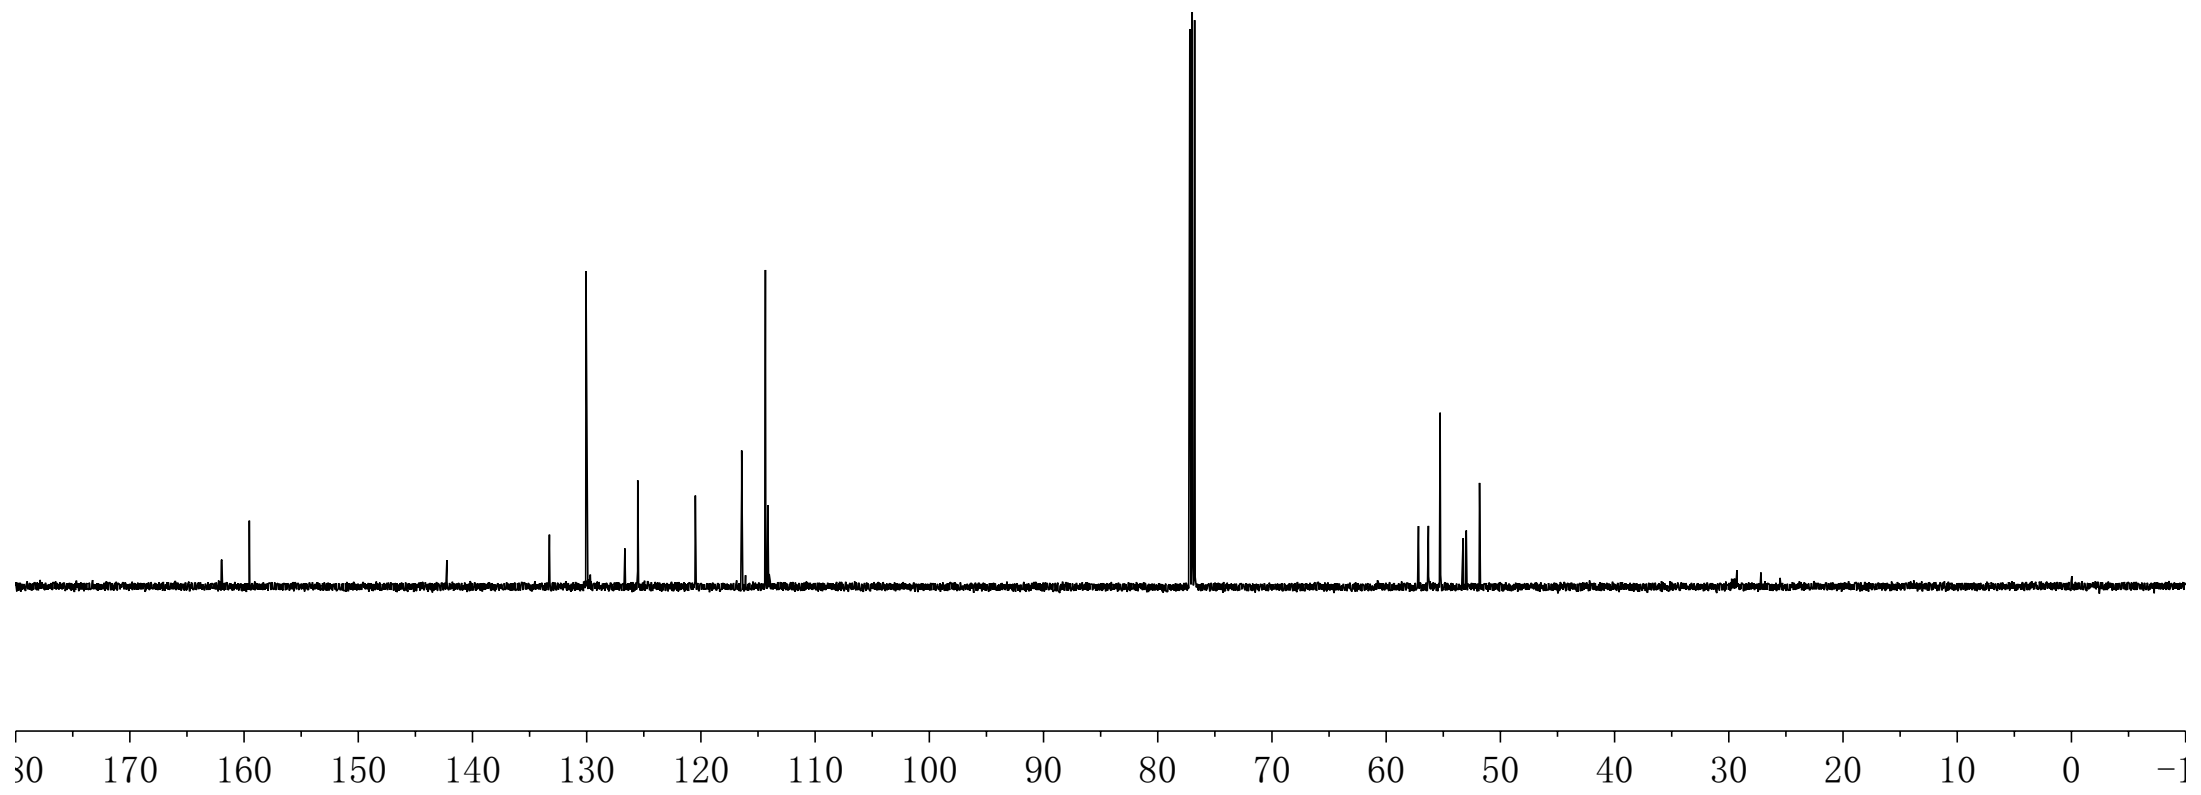

161.88  
161.84  
160.09

142.20  
136.64  
136.63  
133.06  
129.98  
125.55  
120.73  
120.58  
116.48  
114.18  
114.17  
113.85  
113.72

57.90  
57.03  
55.21  
53.35  
53.30  
53.08  
53.04  
52.53

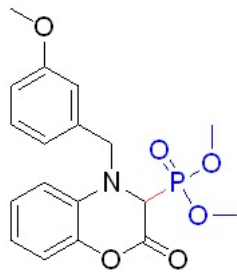

3ca

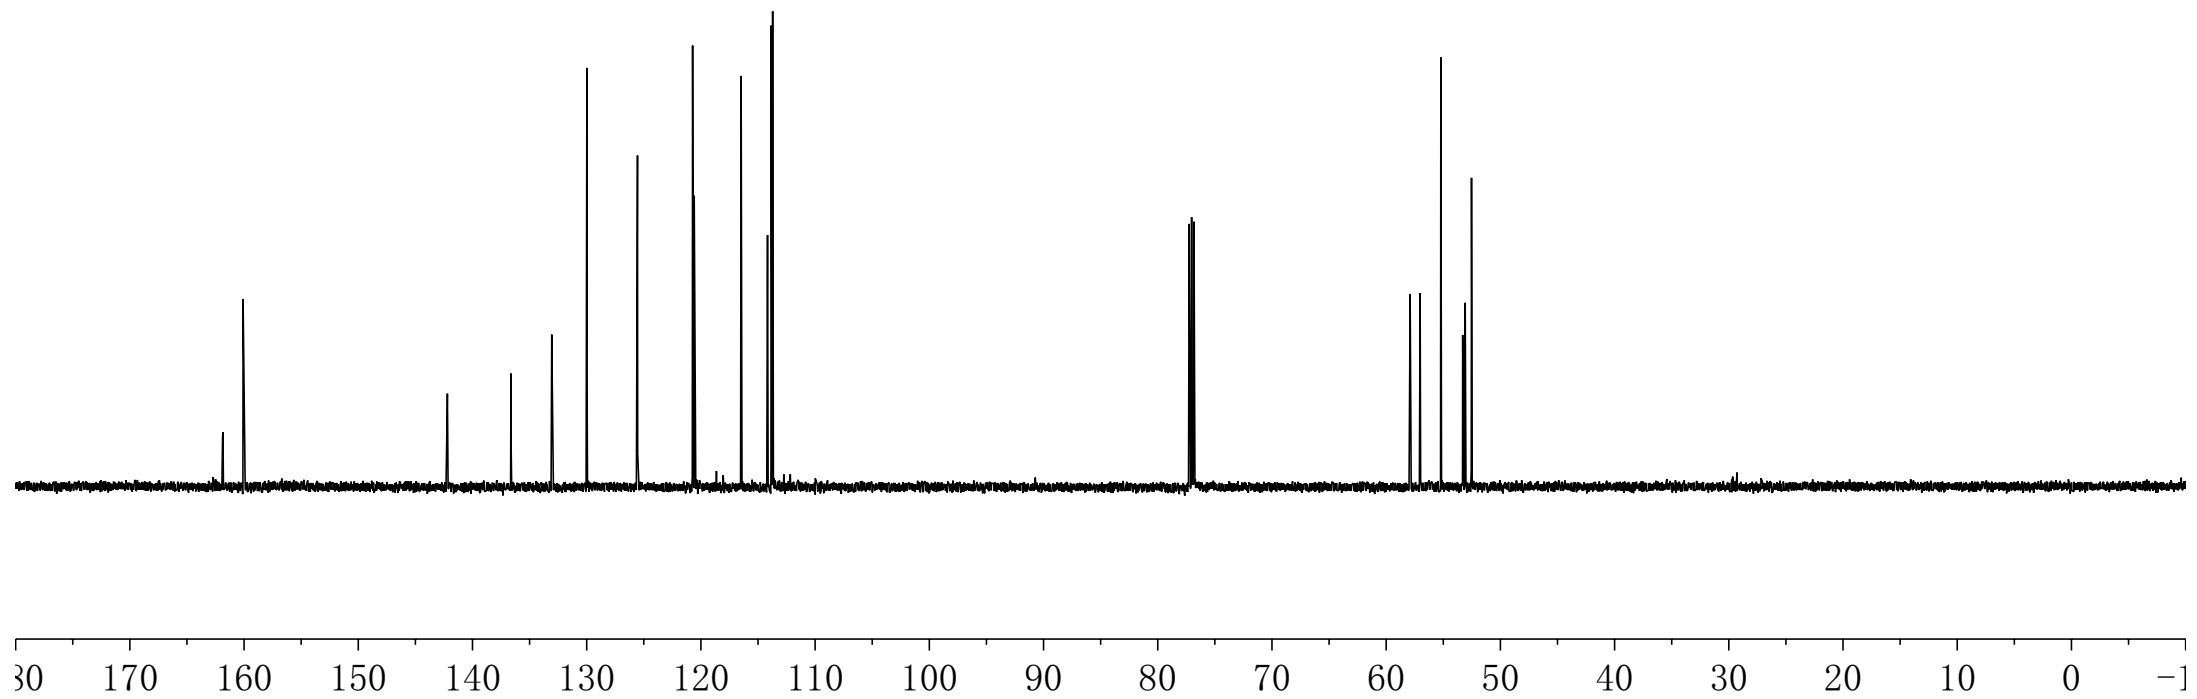

161.65  
161.60  
157.85

142.11

132.27  
130.15  
129.37  
125.33  
123.46  
120.40  
119.93  
116.46  
114.67  
110.60

59.54  
58.63  
55.29  
53.41  
53.36  
53.29  
53.25  
49.54

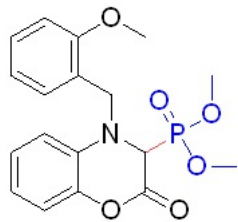

3da

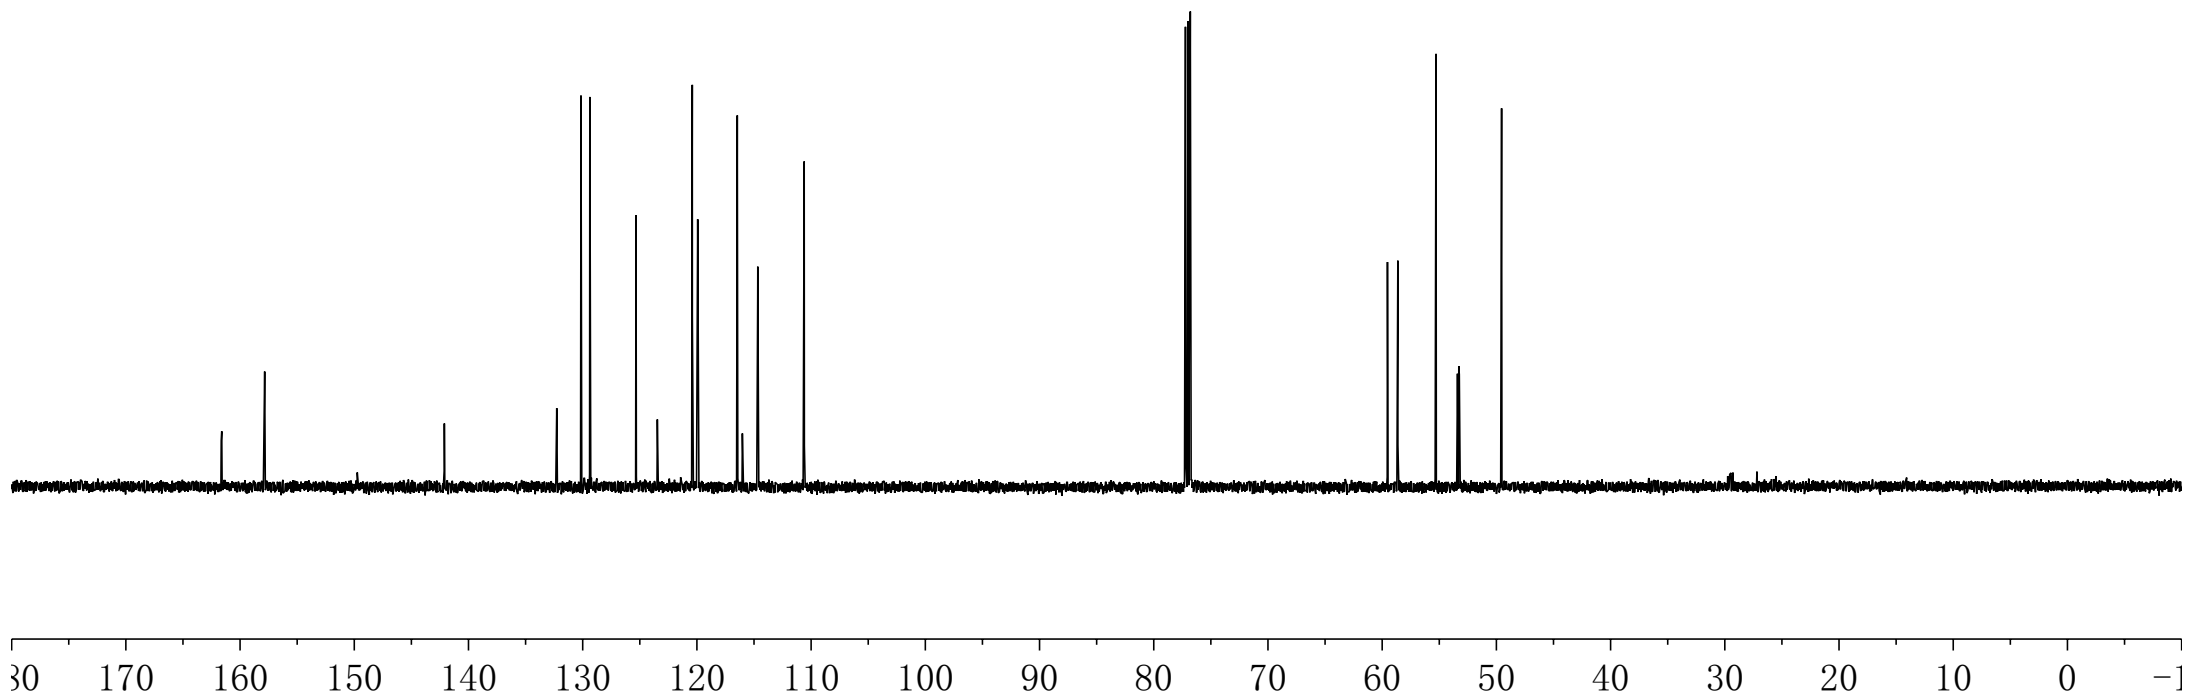



163.36  
161.81  
161.77  
161.72

142.25

132.93  
130.72  
130.27  
130.22  
125.55  
120.77  
116.54  
115.97  
115.83  
114.14

57.79  
56.91  
53.36  
53.31  
53.09  
53.04  
51.81

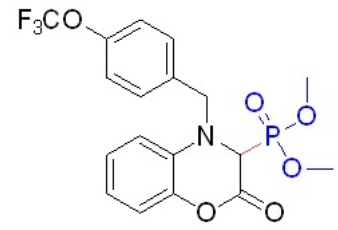

3ea

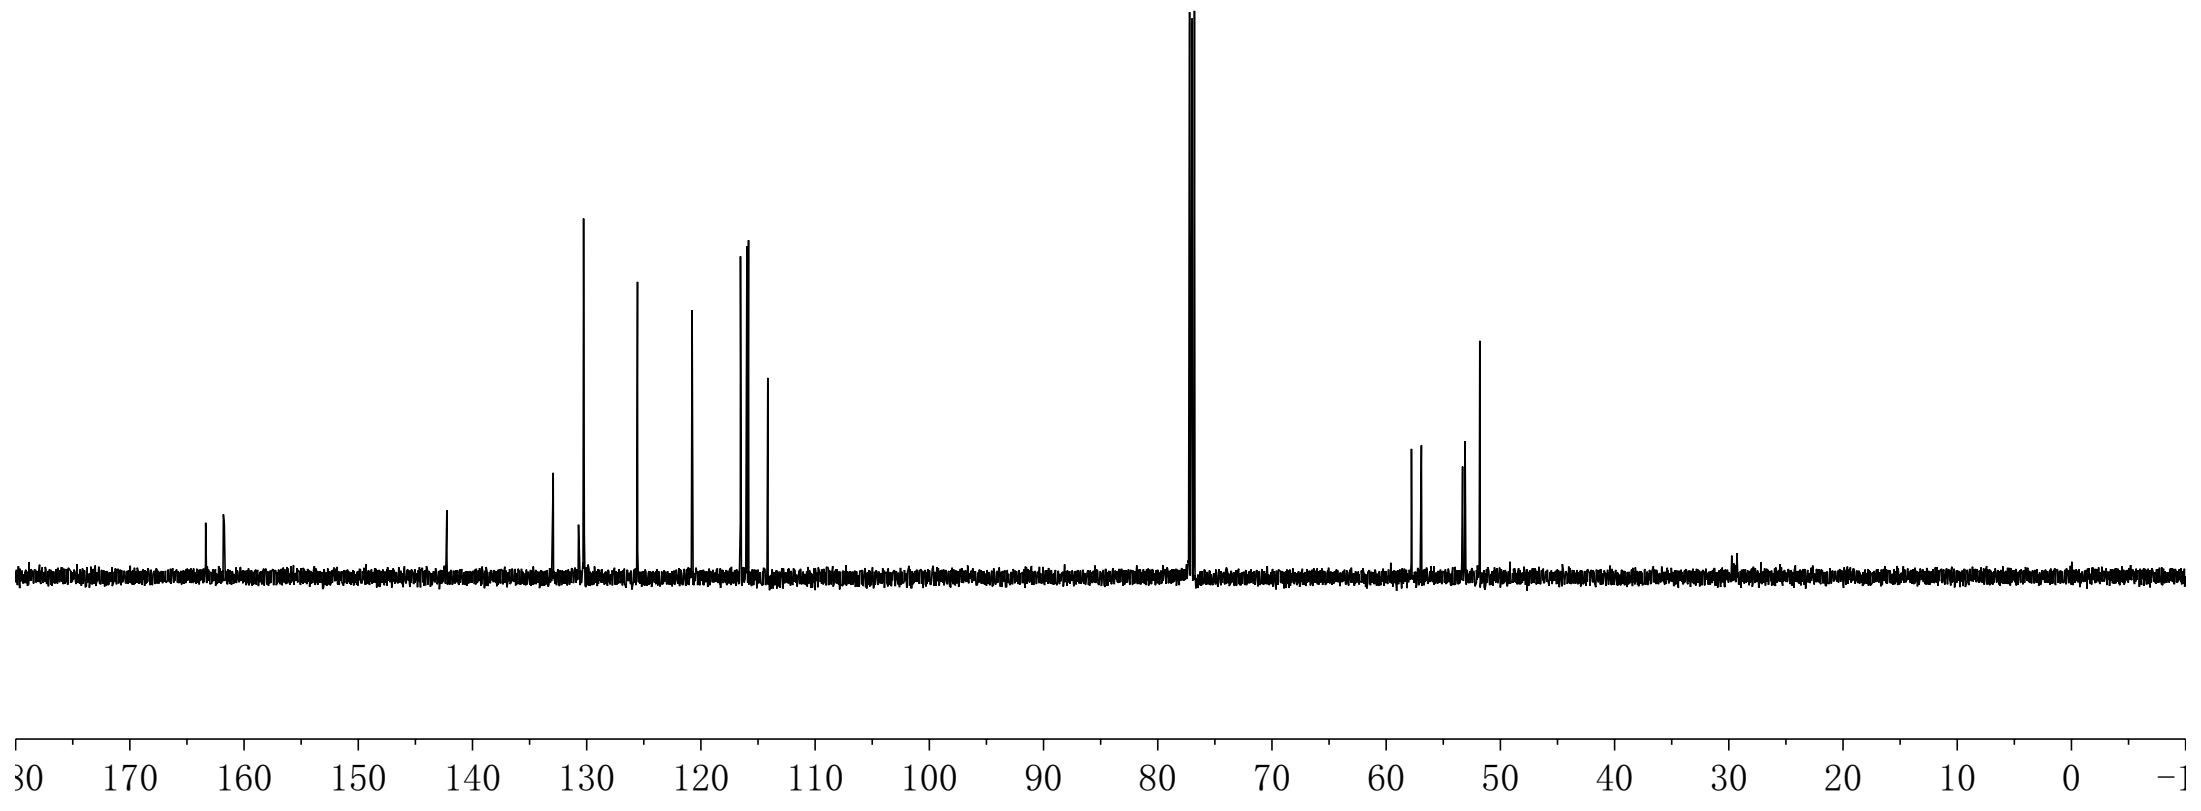

161.74  
161.71

148.98

142.22

133.84

133.83

132.74

129.77

125.59

121.36

120.89

116.60

114.12

114.11

58.25

57.38

53.38

53.33

53.13

53.08

51.83

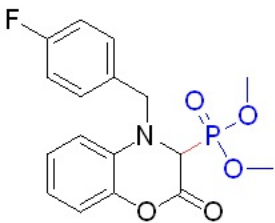

3fa

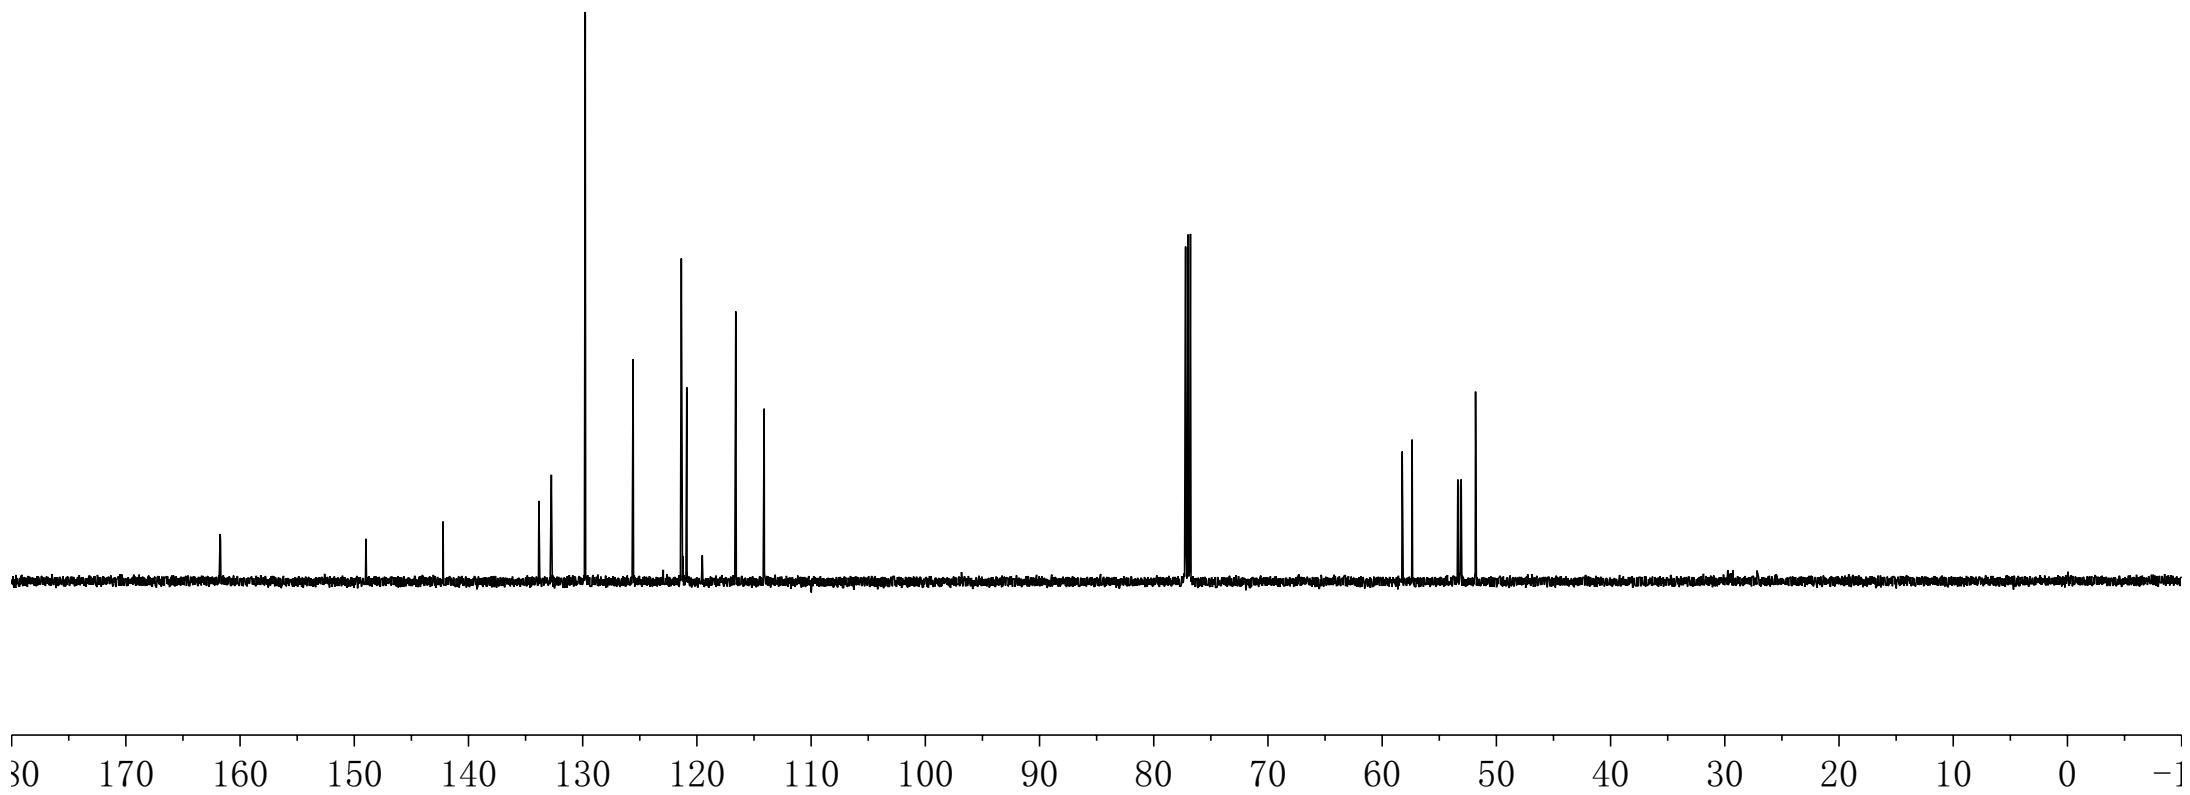

161.75  
161.71

142.22

134.02  
133.61  
132.78  
129.76  
129.15  
125.56  
120.84  
116.57  
114.15  
114.14

58.13  
57.26  
53.40  
53.35  
53.12  
53.08  
51.95

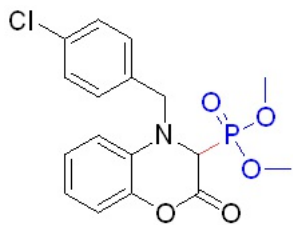

3ga

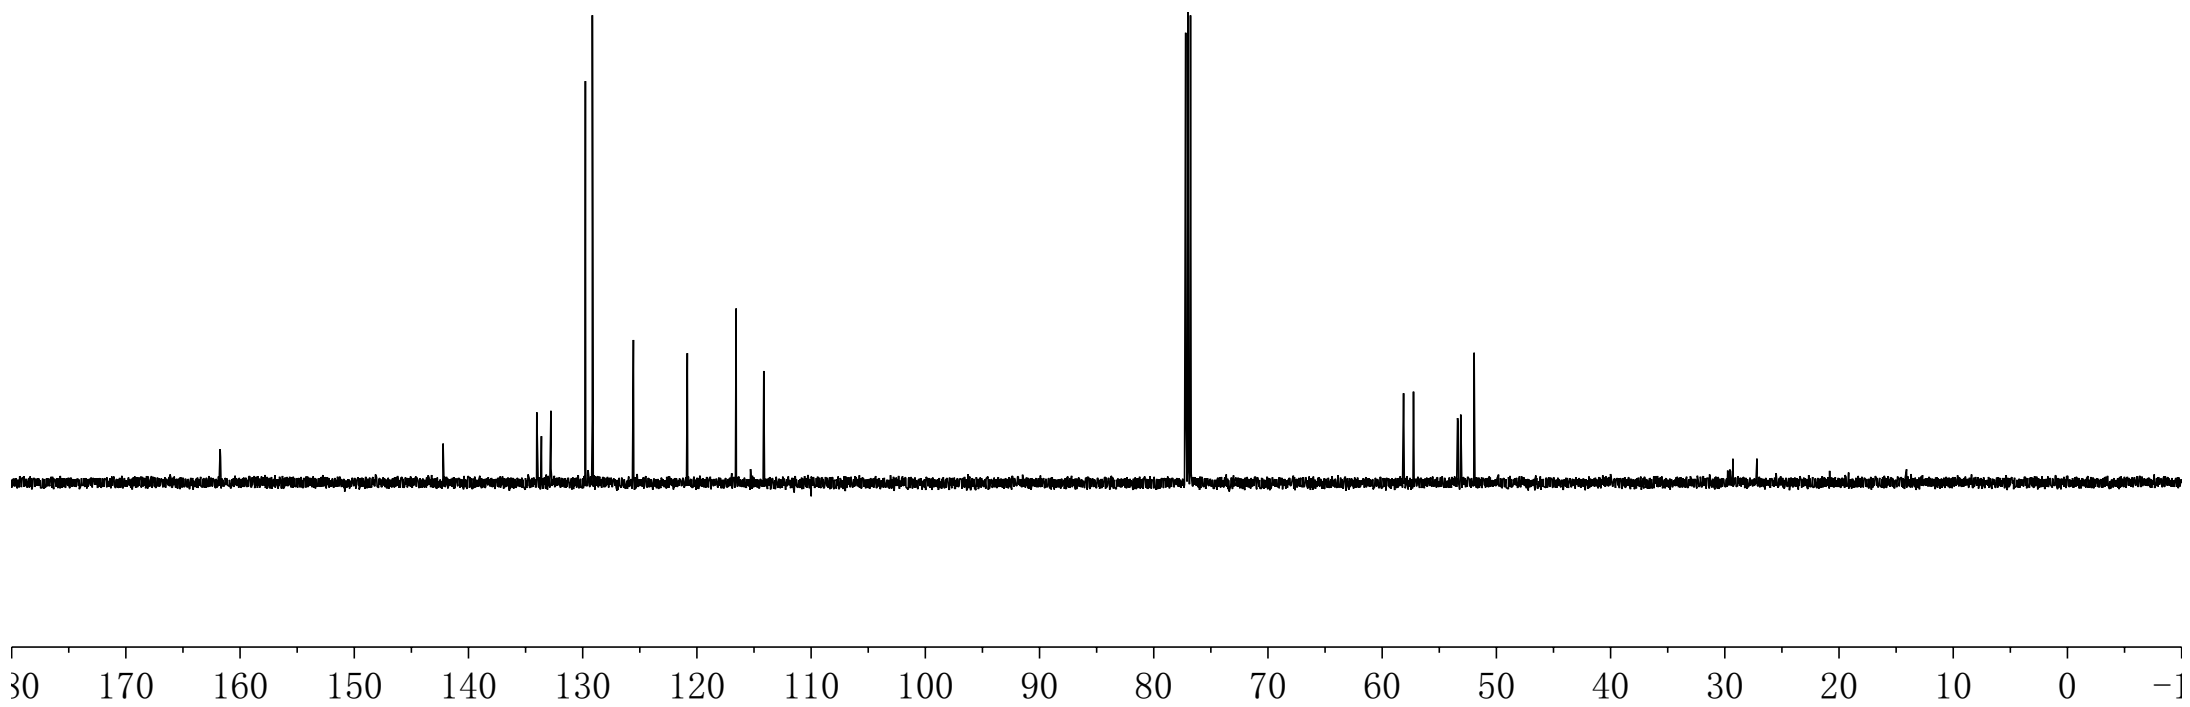

161.73  
161.70

142.22

134.17  
132.76  
132.10  
130.07  
125.56  
122.11  
120.84  
116.57  
114.15  
114.14

58.19  
57.32  
53.40  
53.35  
53.11  
53.07  
52.01

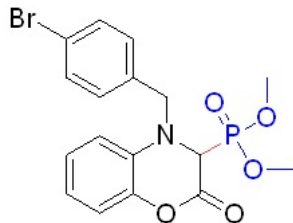

3ha

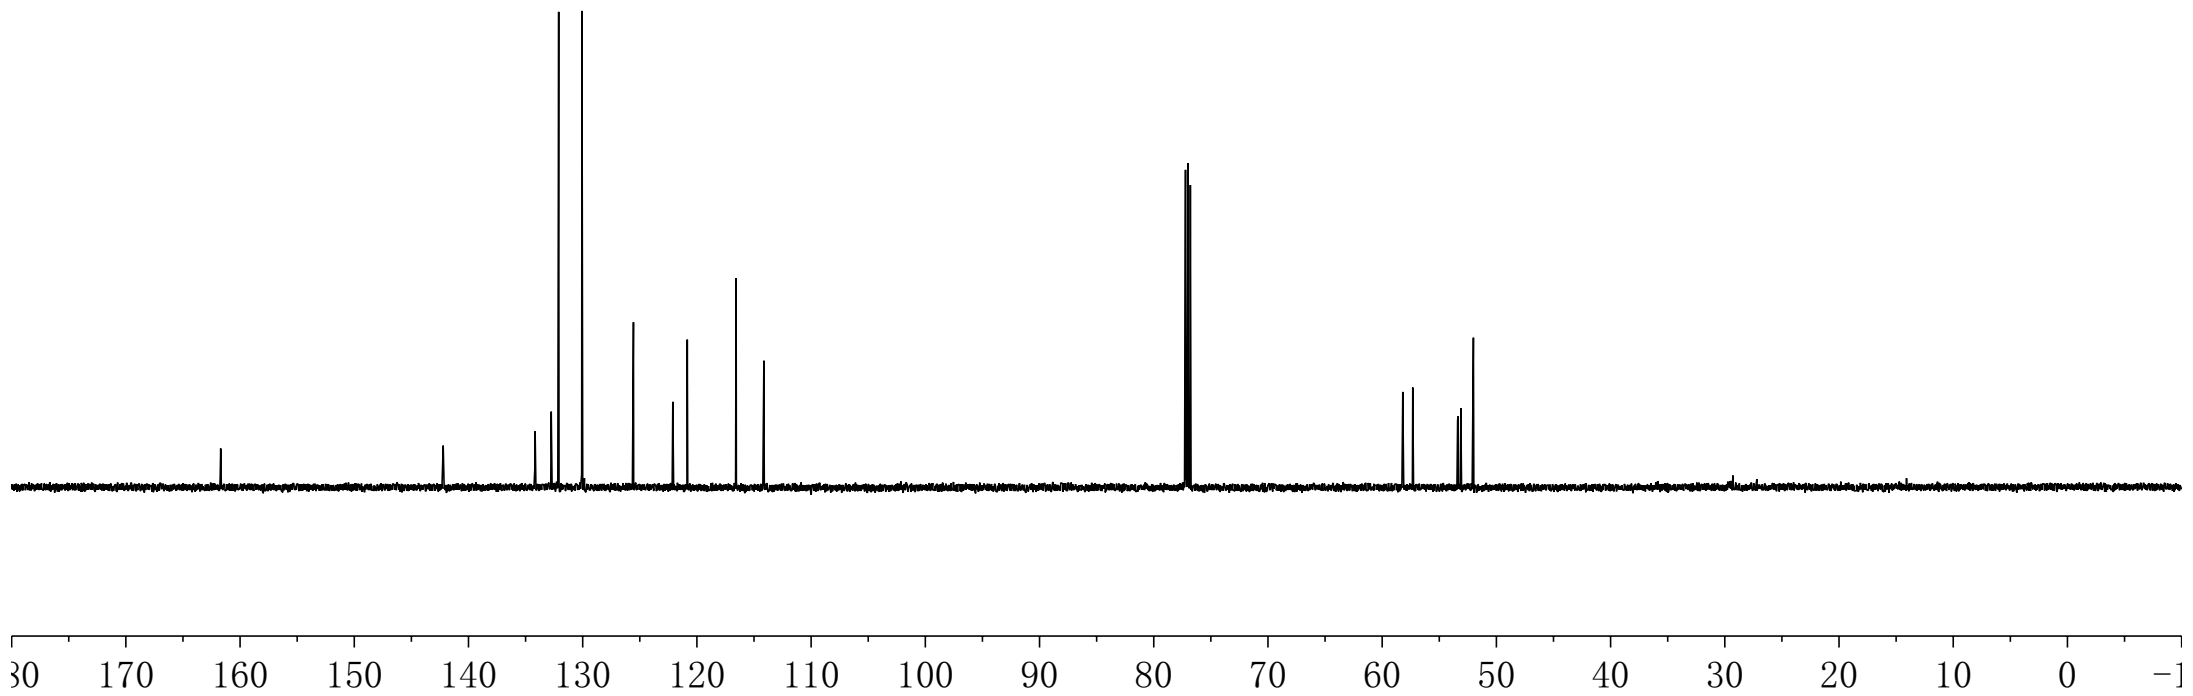

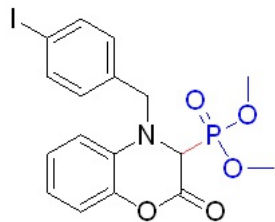

**3ia**

—161.68

142.21  
138.07  
134.86  
132.75  
130.26  
125.55  
120.83  
116.57  
114.14

—93.70

58.25  
57.37  
53.40  
53.35  
53.11  
53.07  
52.12

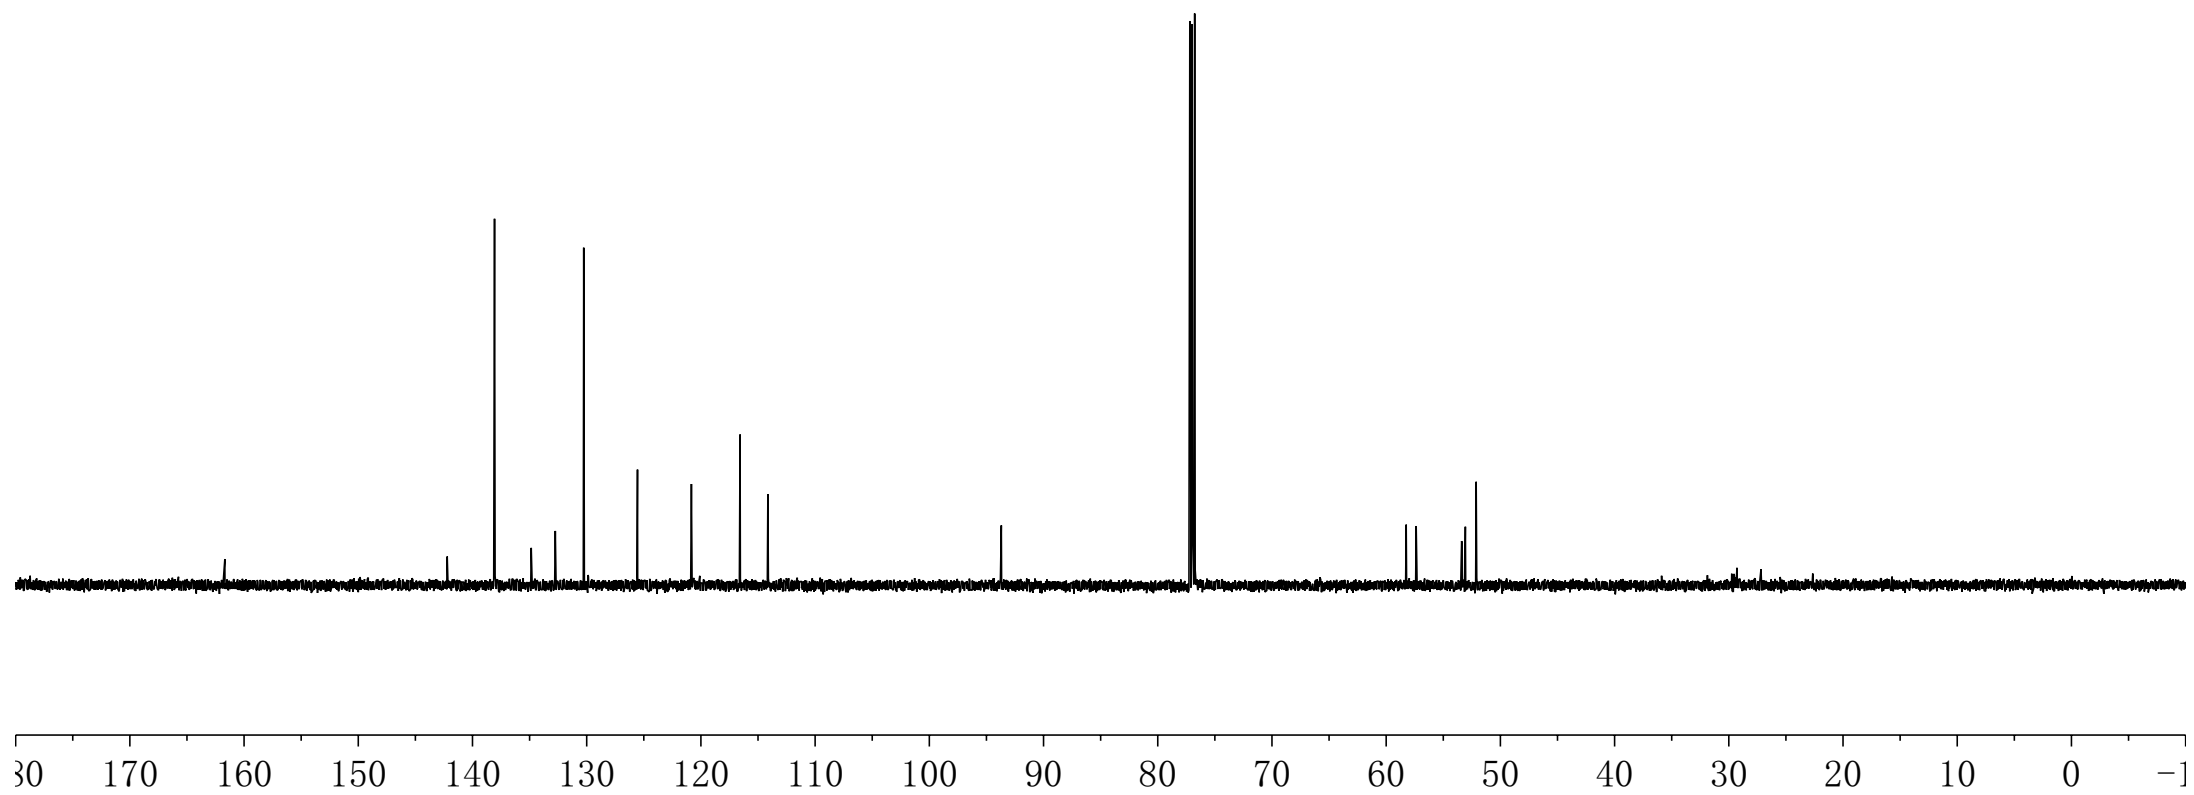

161.96  
161.92

142.22  
138.00  
133.21  
131.81  
129.64  
129.53  
128.60  
125.53  
120.47  
116.44  
114.15  
114.14

57.52  
56.65  
53.32  
53.28  
53.06  
53.01  
52.21

21.13

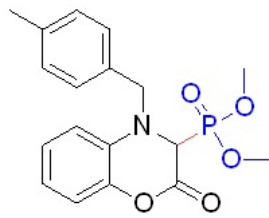

3ja

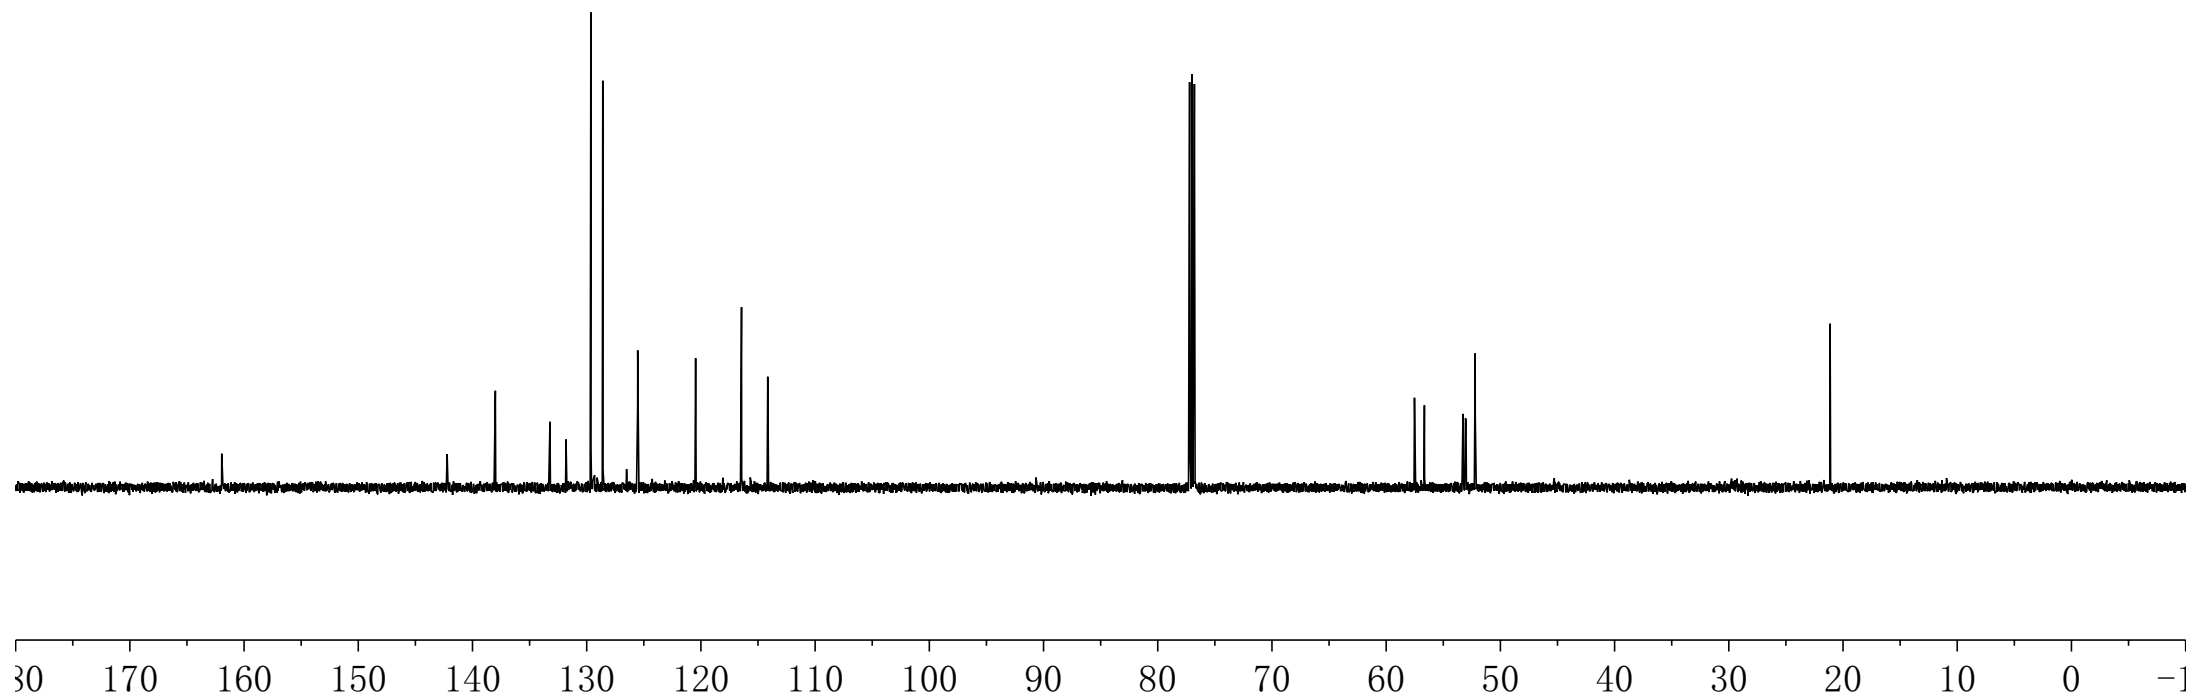

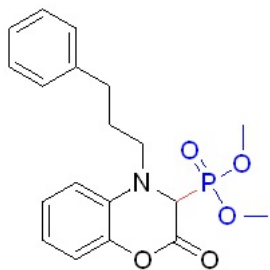

**3ka**

—161.59

~142.11  
~140.83

~132.32  
~128.51  
~128.30  
~126.14  
~125.46

~120.07  
~116.61  
~113.86

~59.95  
~59.06  
~53.33  
~53.28  
~53.19  
~53.14  
~48.83

~32.77  
~28.11  
~28.10

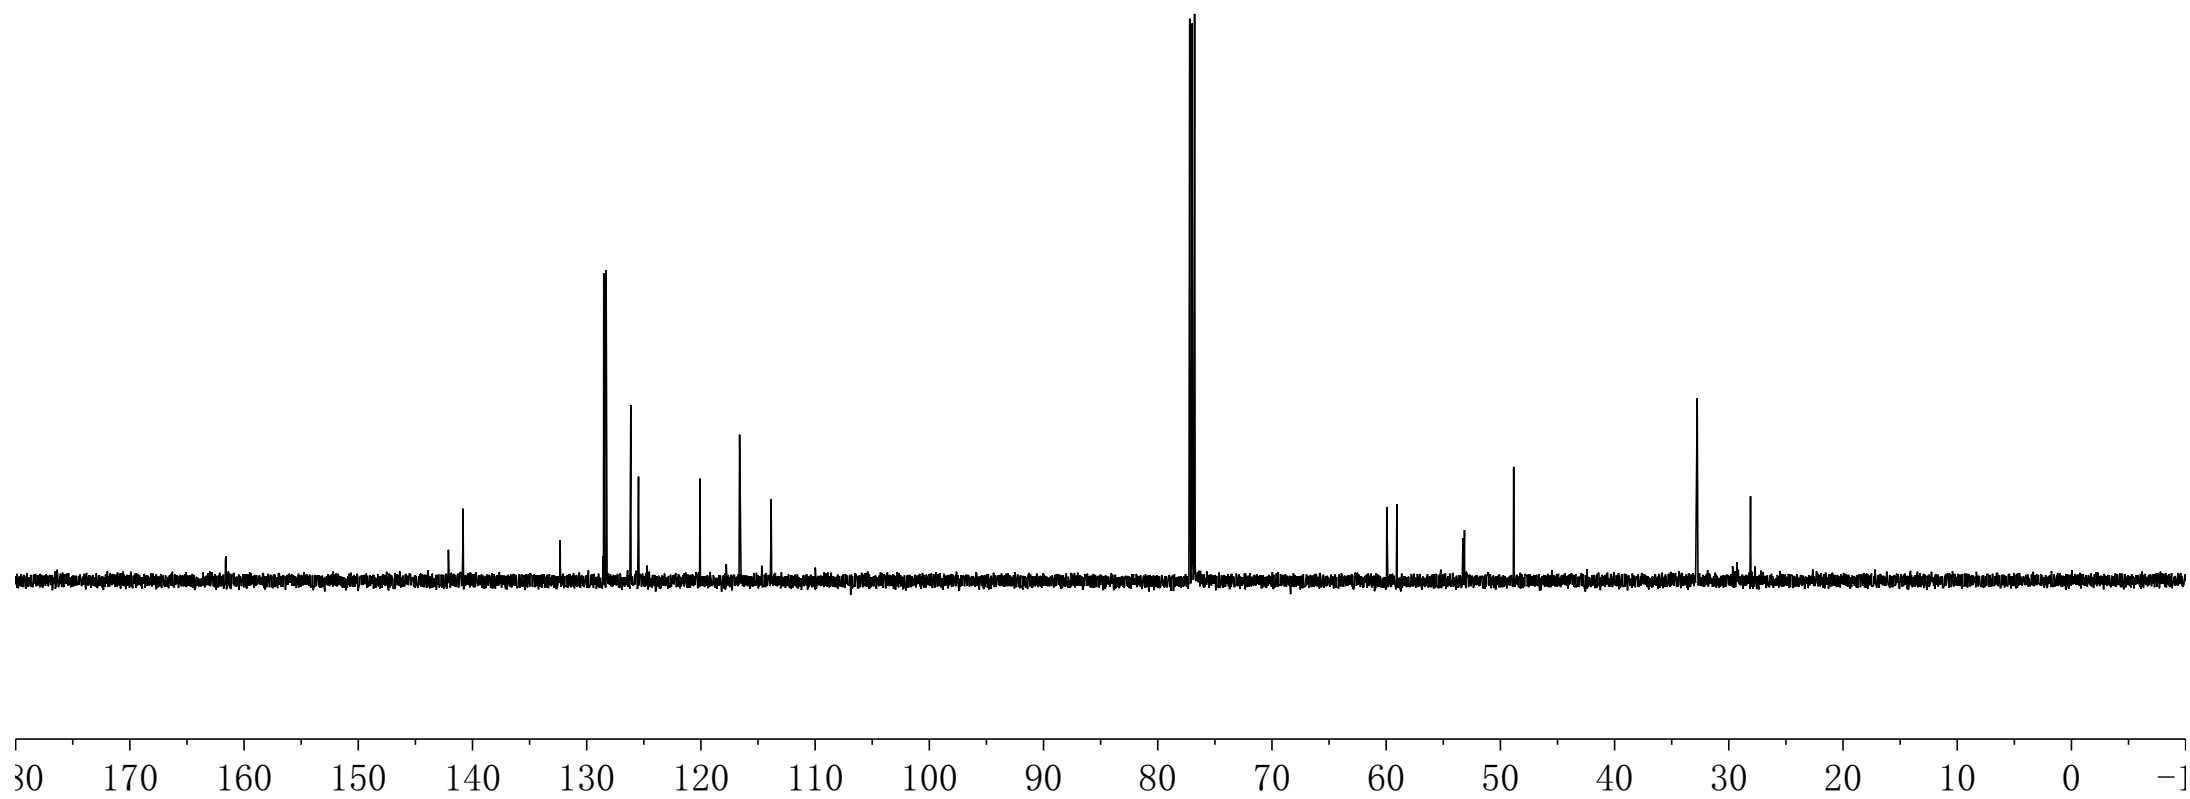

161.38  
161.34  
160.49  
160.45  
143.59  
143.29  
141.92  
141.54  
132.04  
131.28  
128.79  
128.70  
127.03  
126.90  
126.83  
126.82  
125.48  
125.45  
119.97  
119.61  
116.84  
116.71  
113.71  
113.34

60.90  
60.58  
60.01  
59.66  
57.31  
56.62  
53.41  
53.35  
53.30  
53.25  
53.20  
37.51  
37.49  
37.22  
37.20

19.31  
17.87

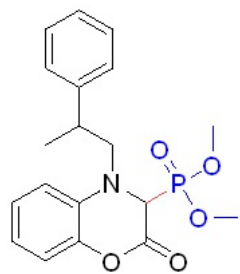

**3la**

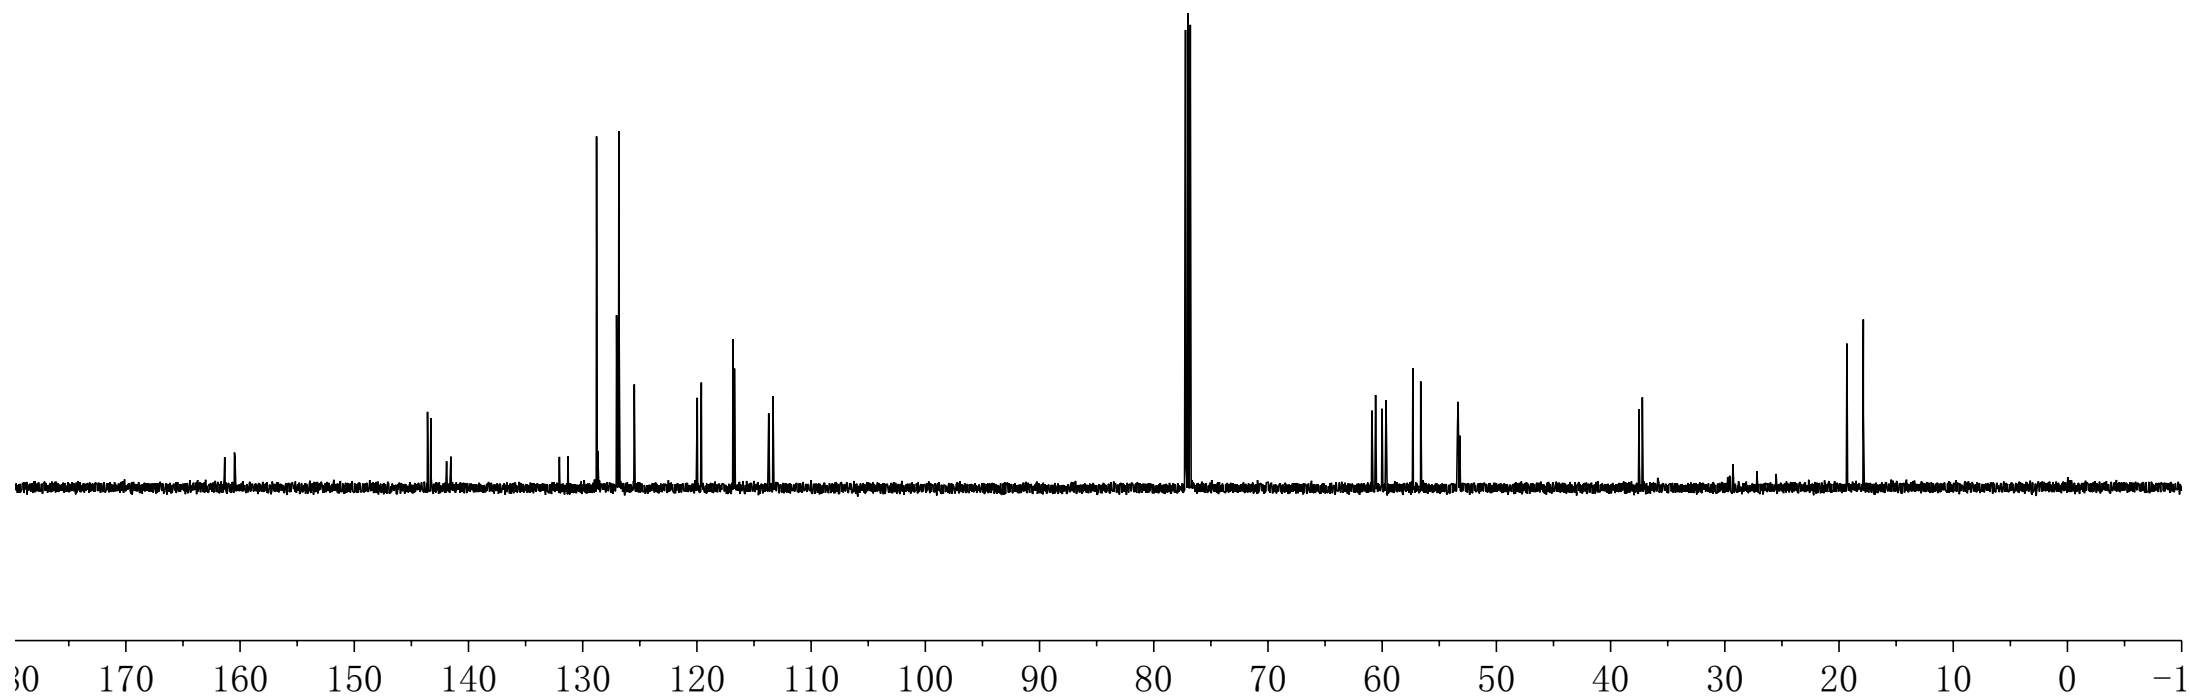



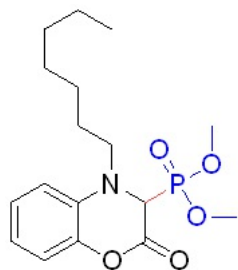

3ma

—161.64

—142.05

—132.58

—125.46

~119.90

~116.57

~113.84

~59.70

~58.82

~53.33

~53.28

~53.19

~53.14

~49.68

~31.69

~28.95

~26.84

~26.78

~22.52

—14.01

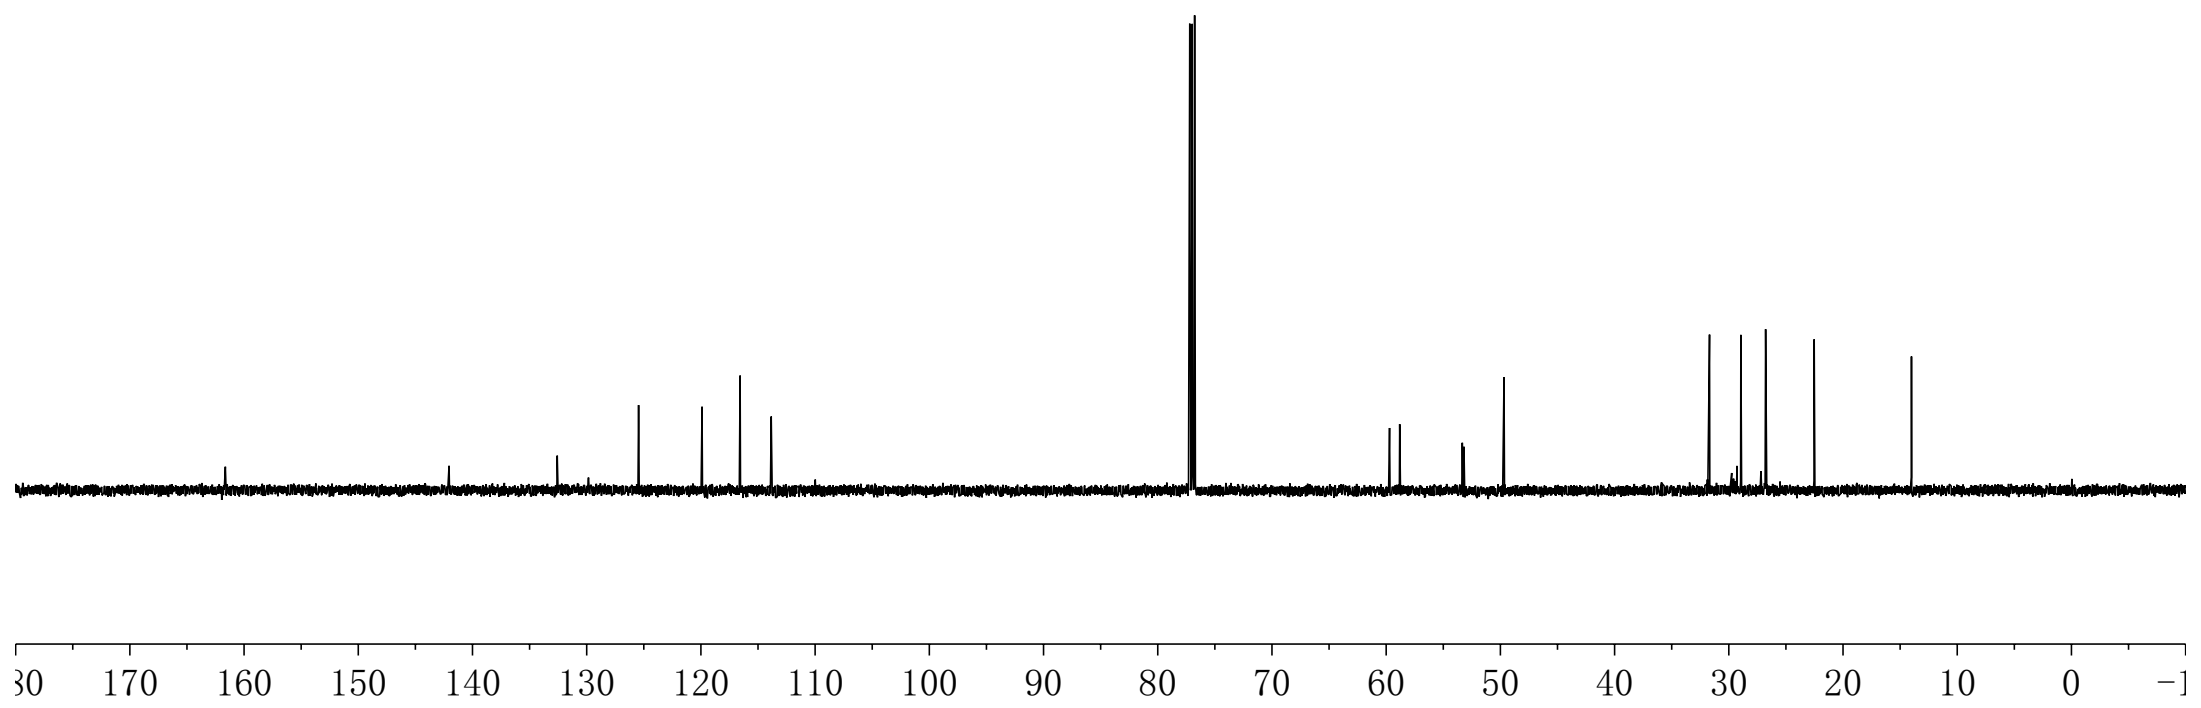

162.01  
161.97

142.17  
135.27  
130.60  
130.56  
128.89  
128.46  
128.10  
125.90

117.00  
114.18

58.17  
57.31  
53.27  
53.22  
53.07  
53.03  
52.86

20.52

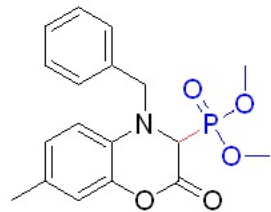

3na

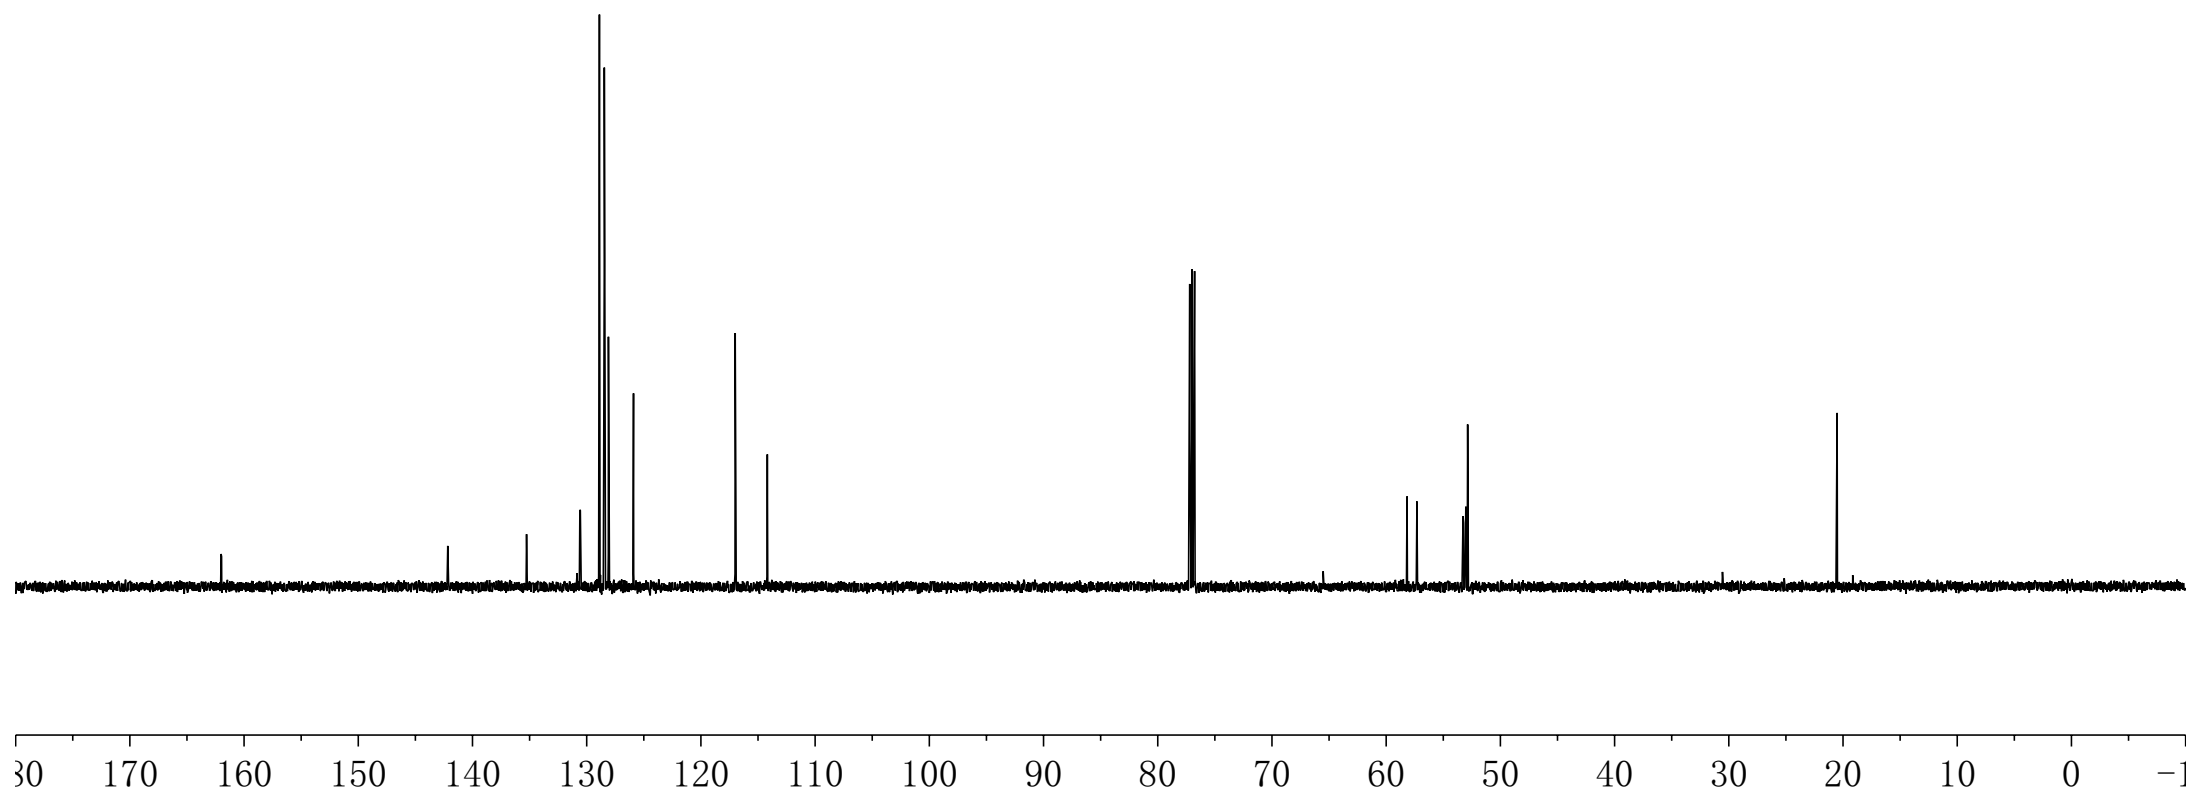

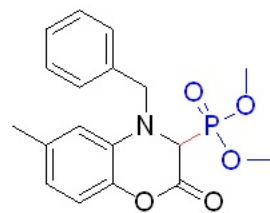

**30a**

—161.93

140.21  
135.34  
135.10  
132.81  
128.93  
128.61  
128.17

121.01  
116.16  
114.67

57.64  
56.77  
53.29  
53.24  
53.07  
53.03  
52.37

—21.29

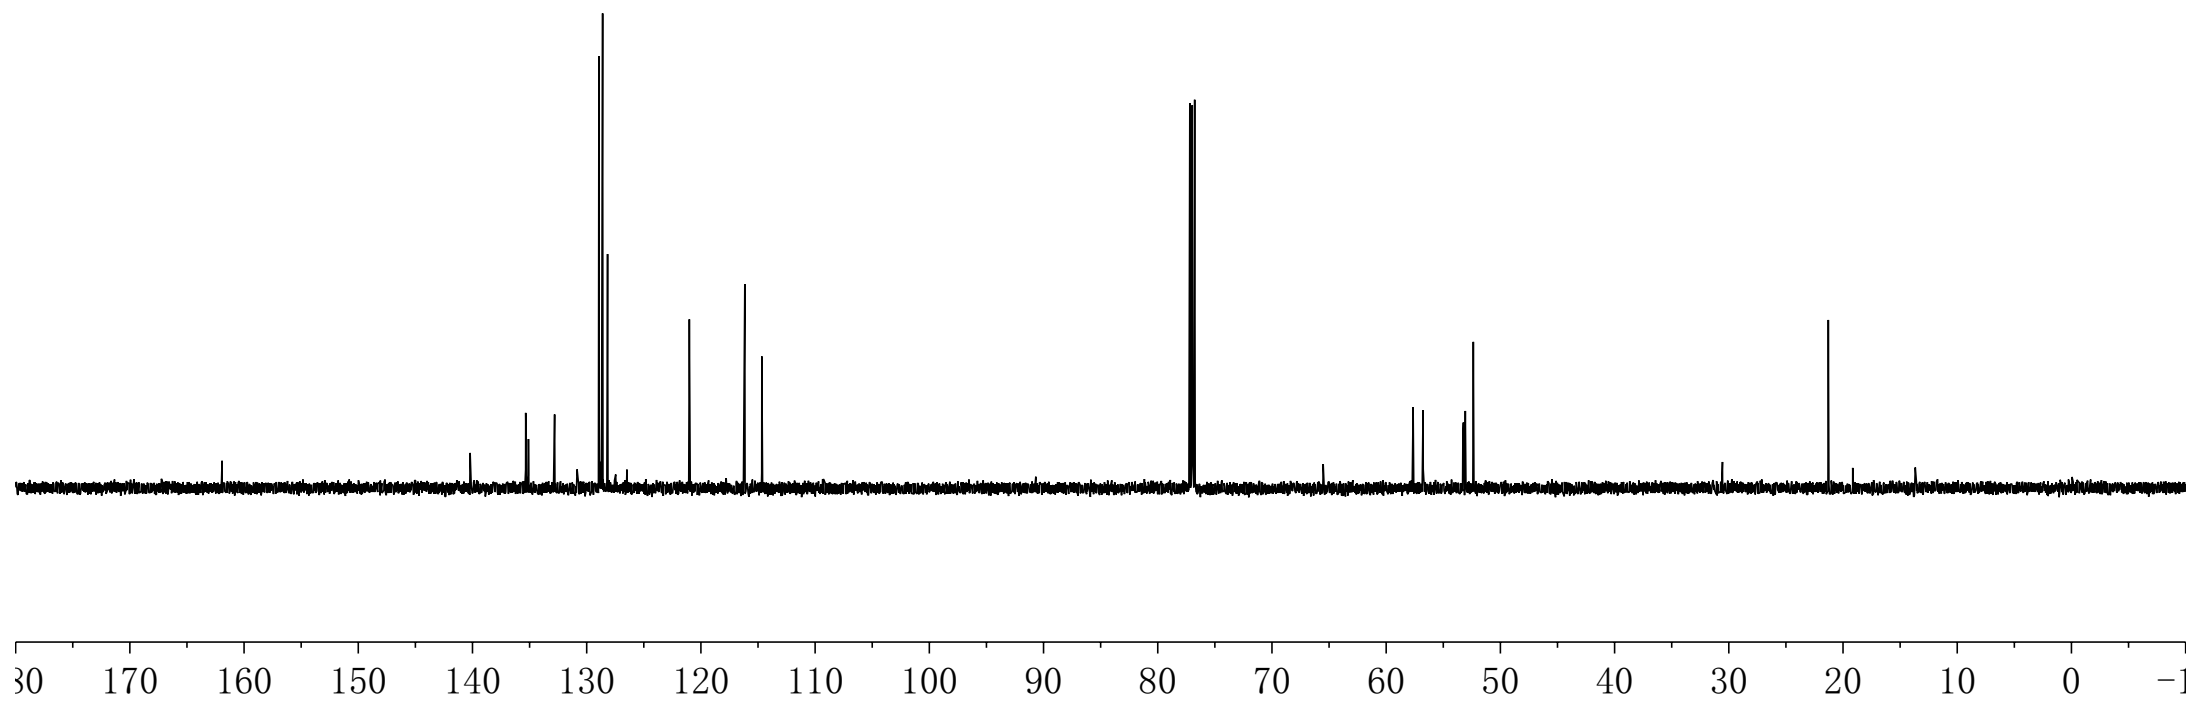

—161.98  
—148.79  
~140.17  
/135.27  
/132.30  
/128.89  
/128.54  
/128.10

~117.42  
~115.79  
—111.63

58.24  
57.37  
53.25  
53.20  
52.94  
52.90  
52.79

—34.67  
—31.34

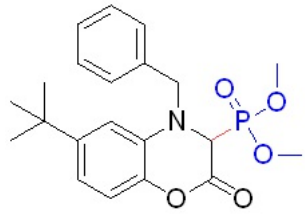

**3pa**

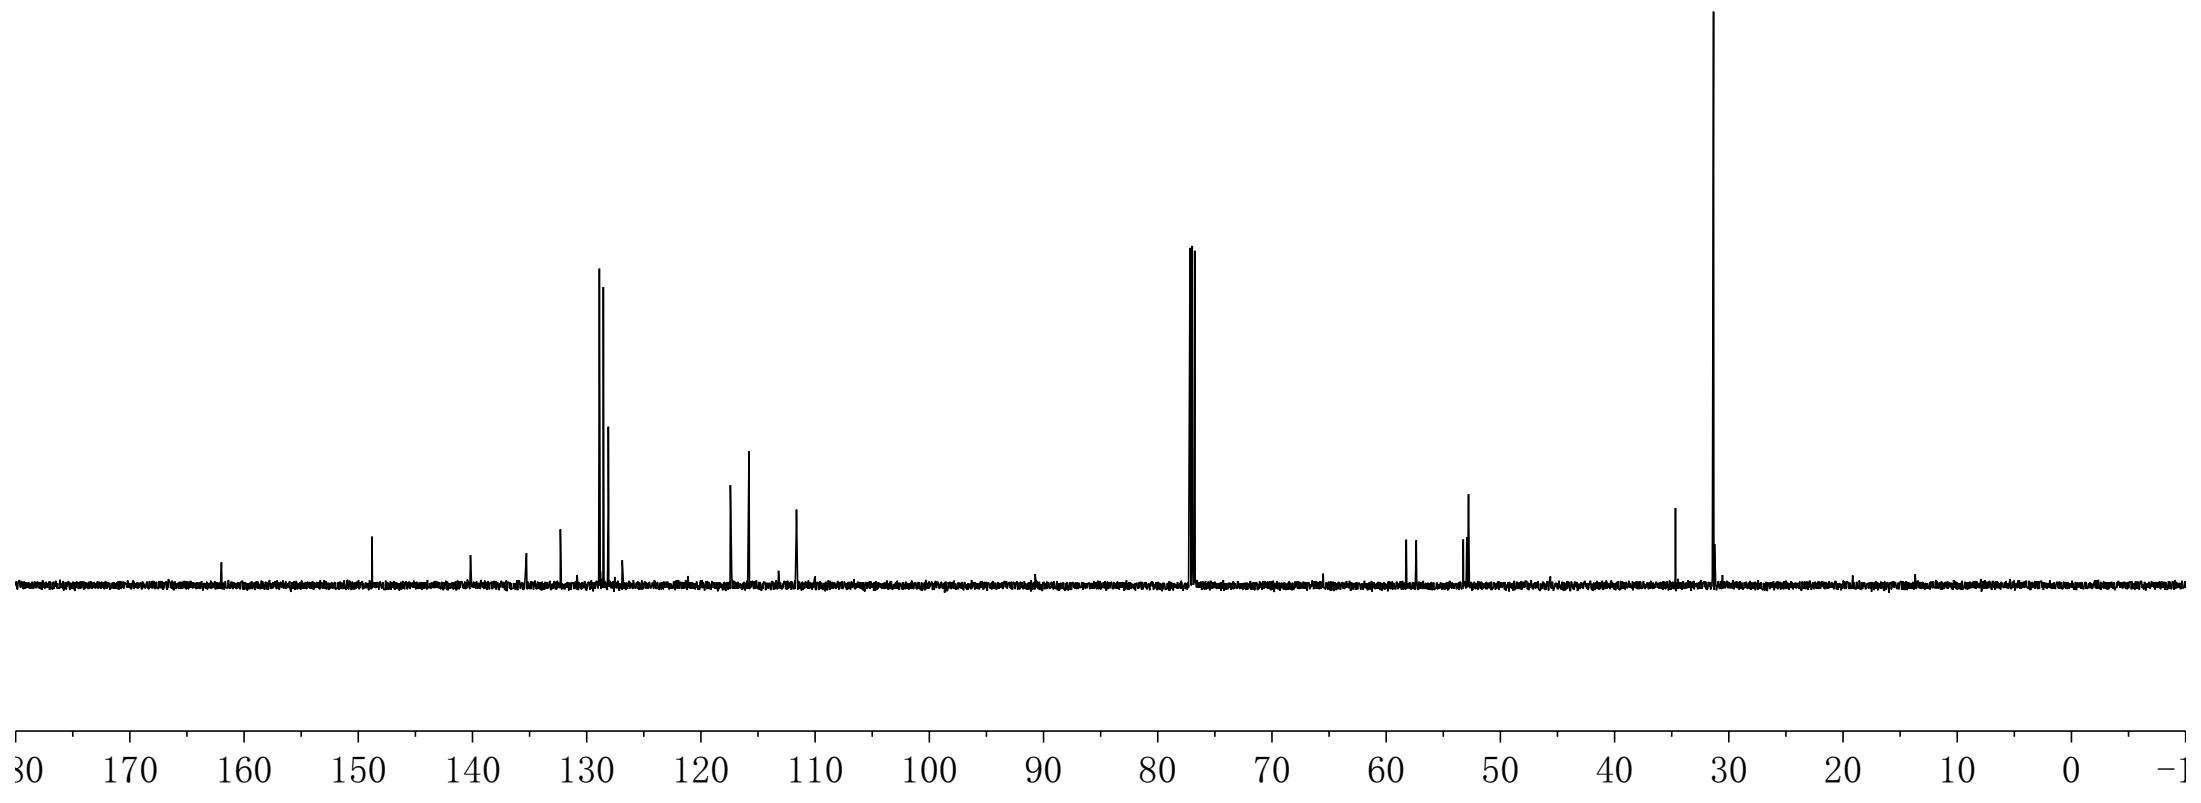

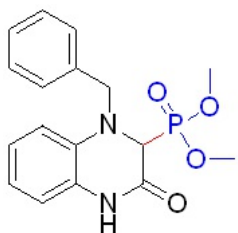

**3ra**

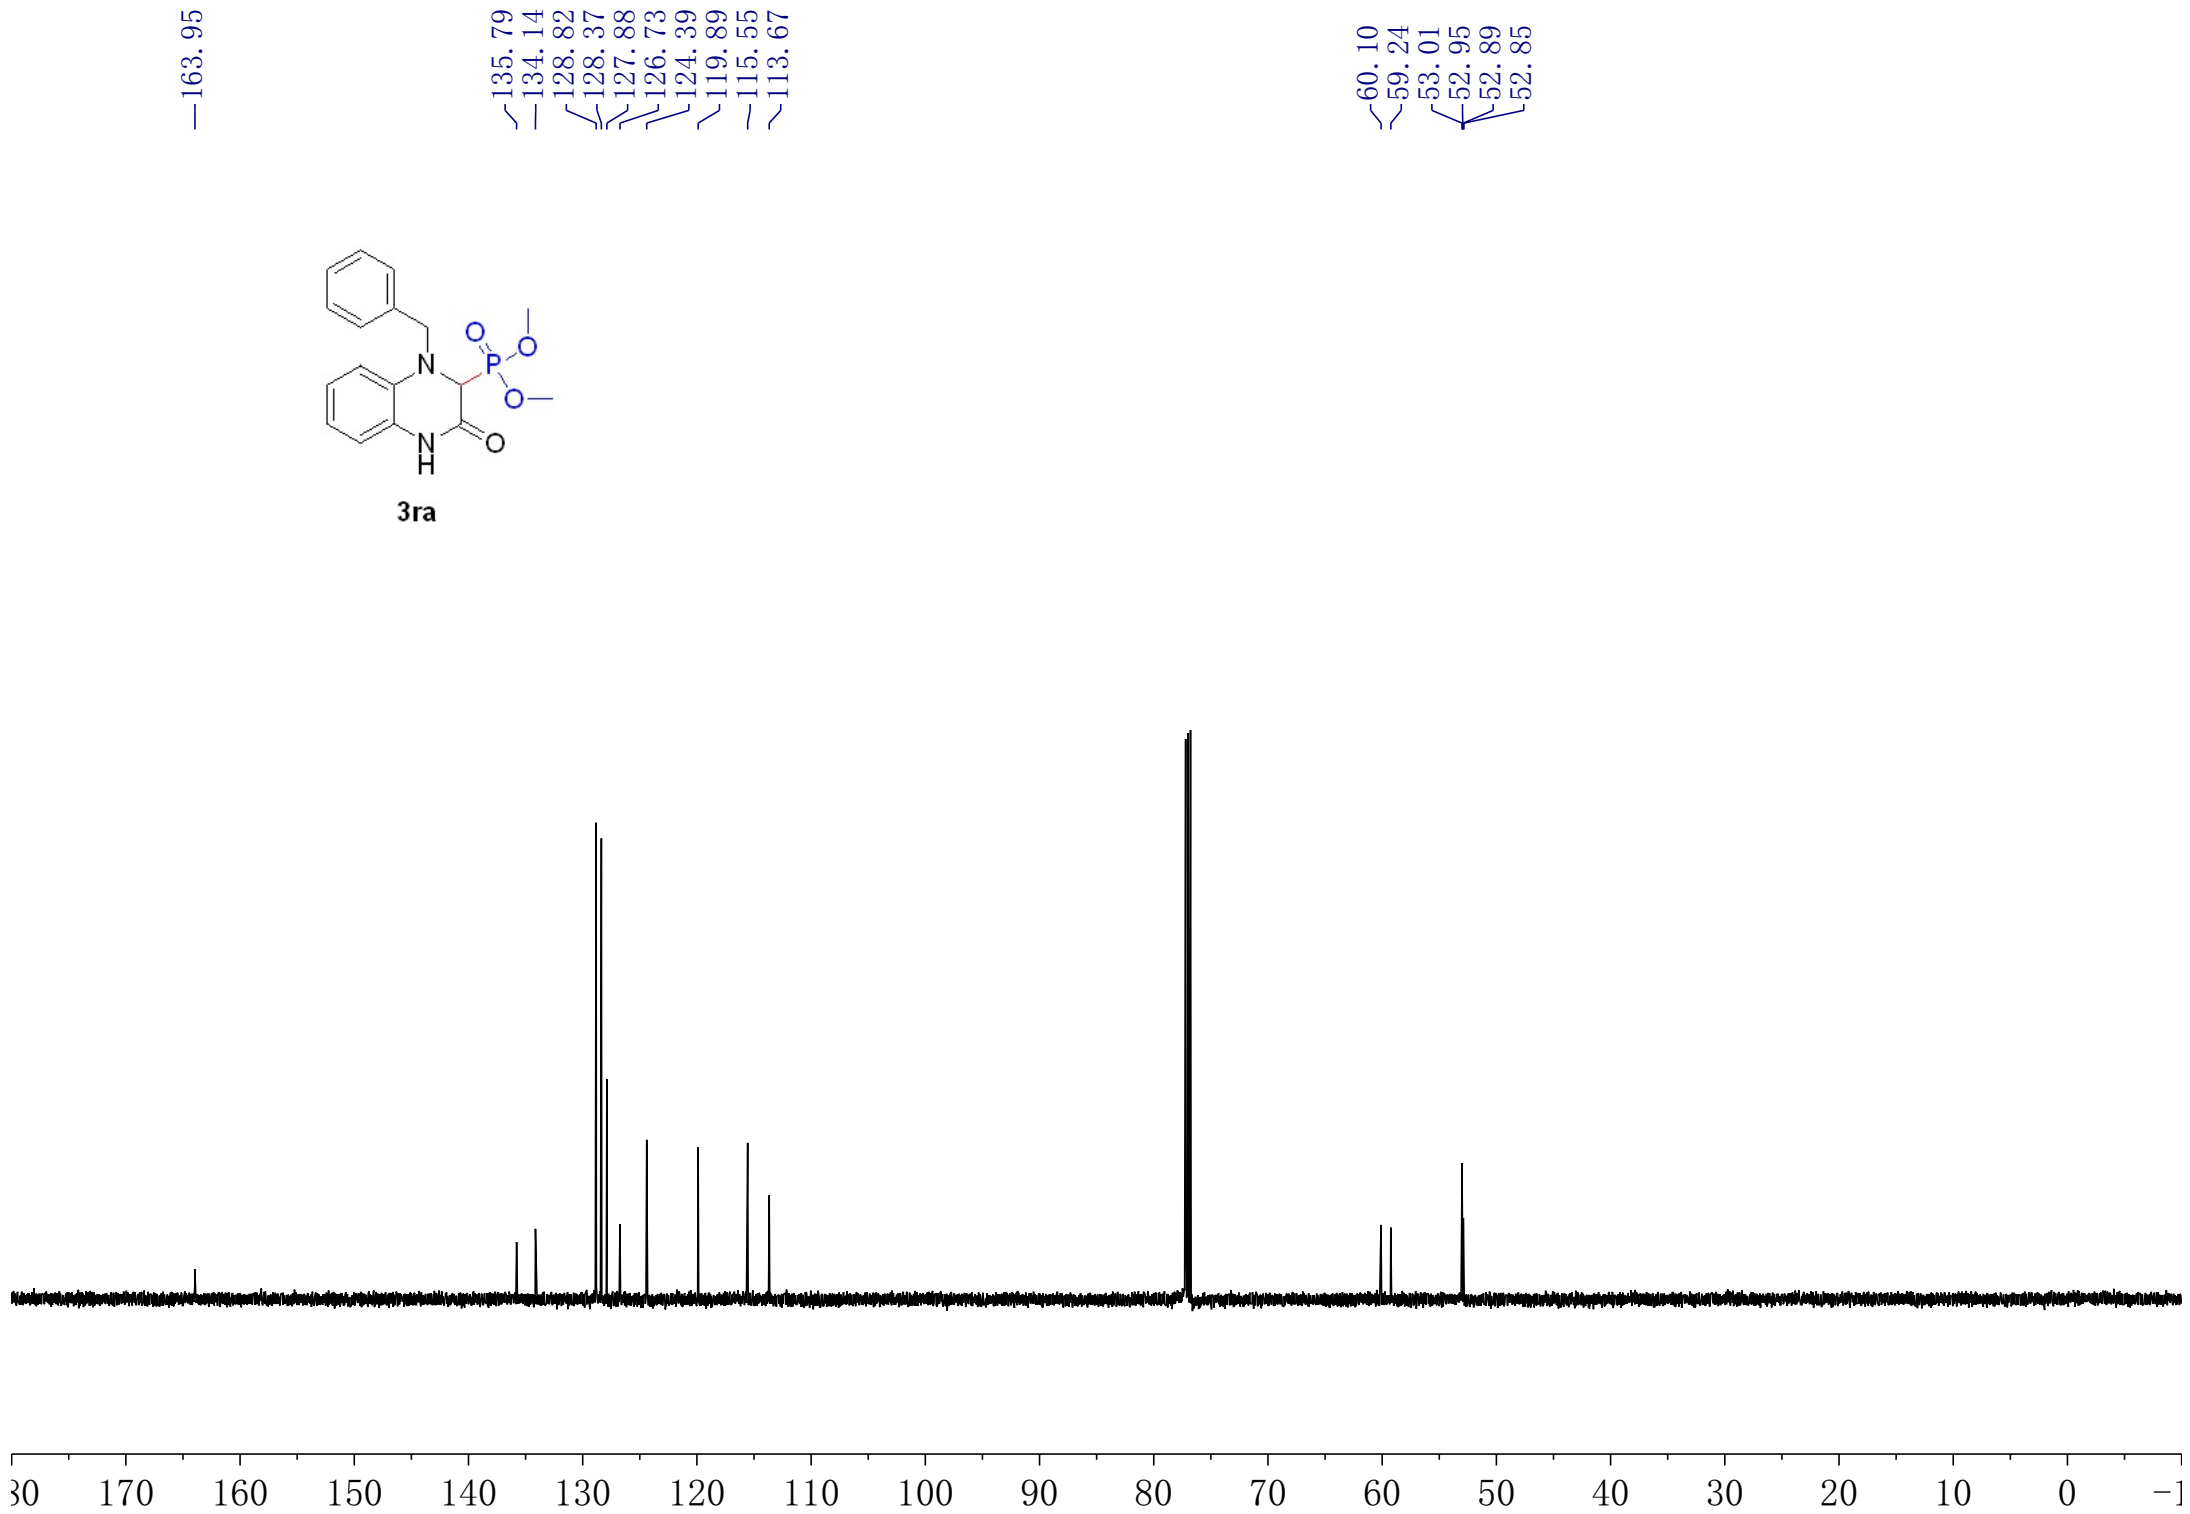

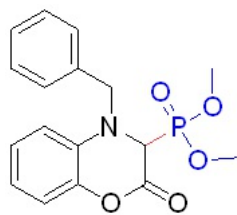

**3aa**

—19.31

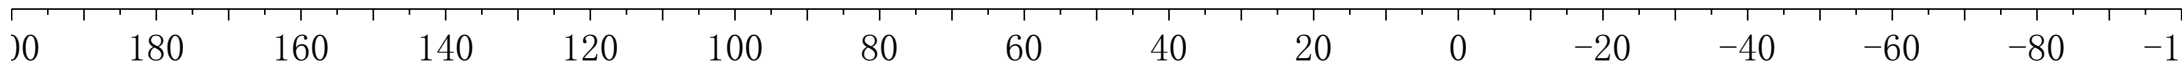

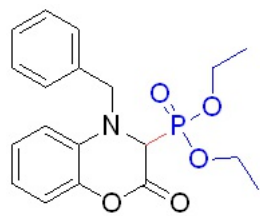

**3ab**

—16.42

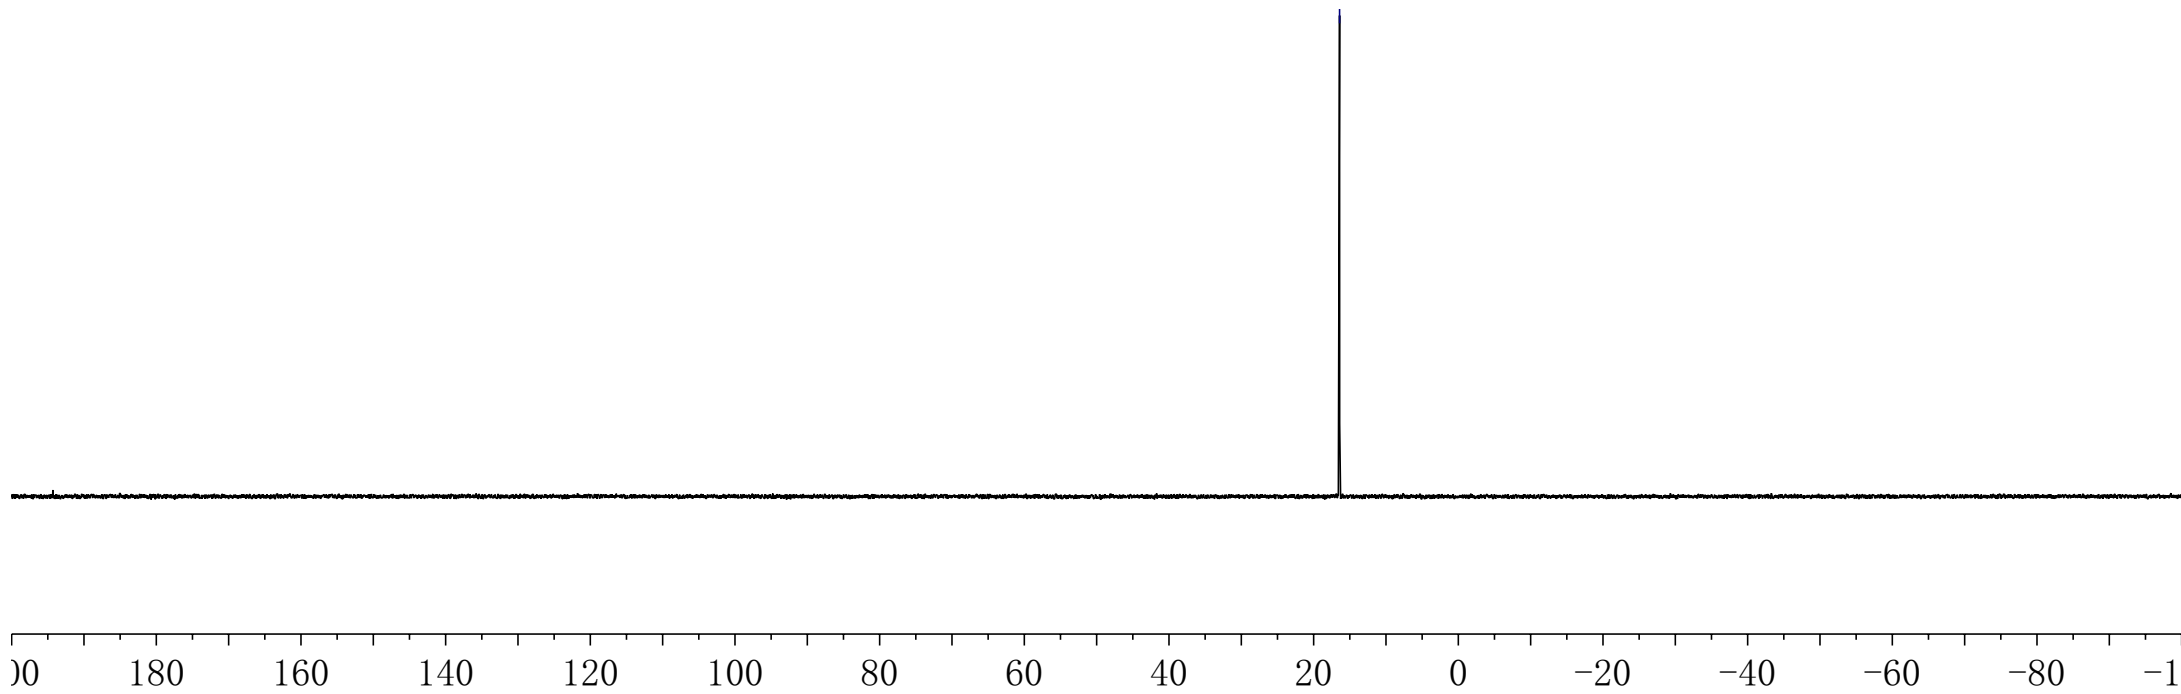

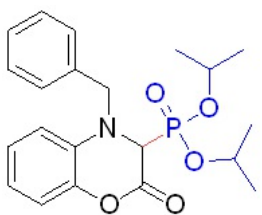

**3ac**

—14.29

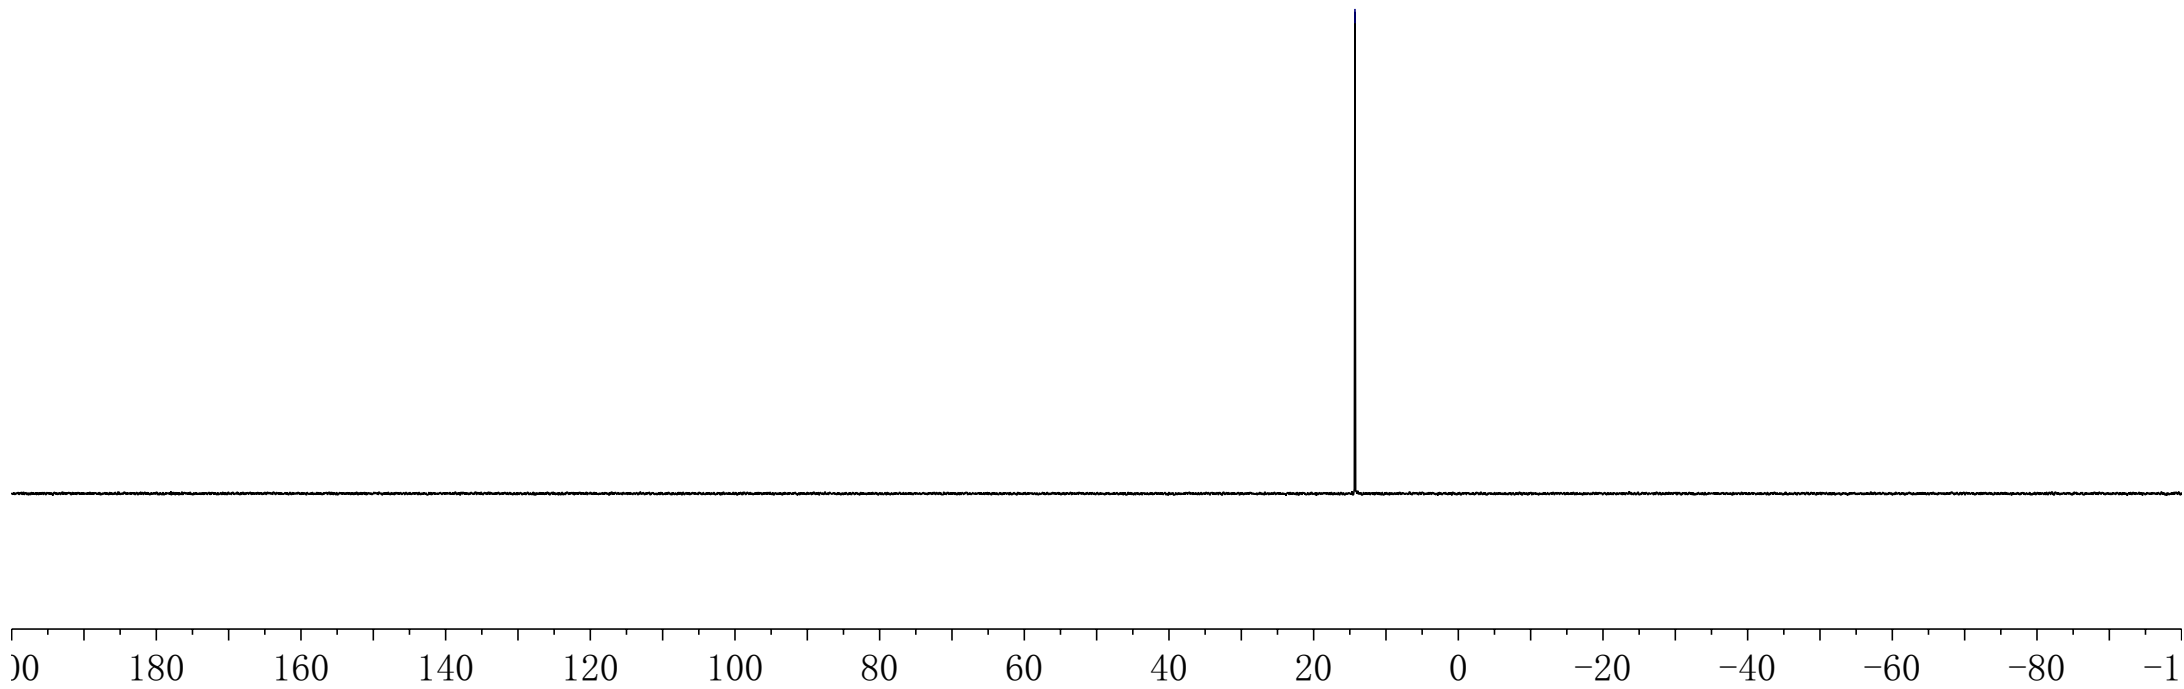



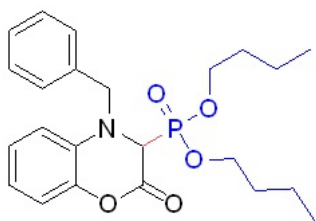

**3ad**

—16.59

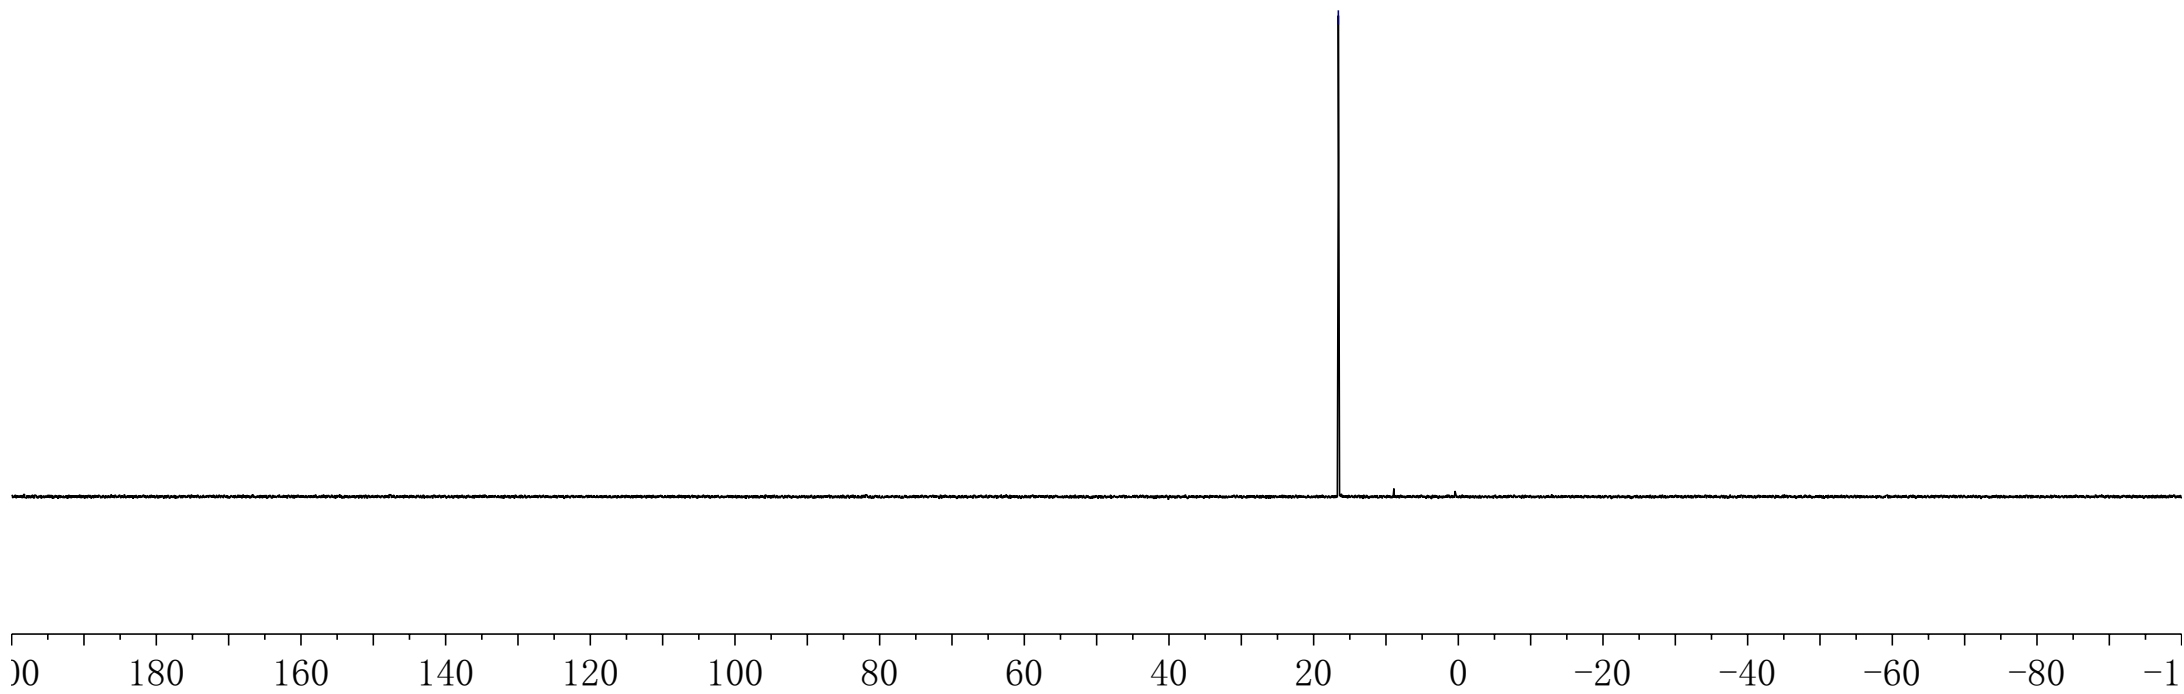

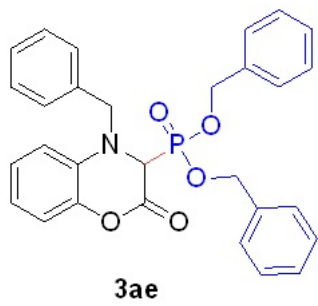

-17.42

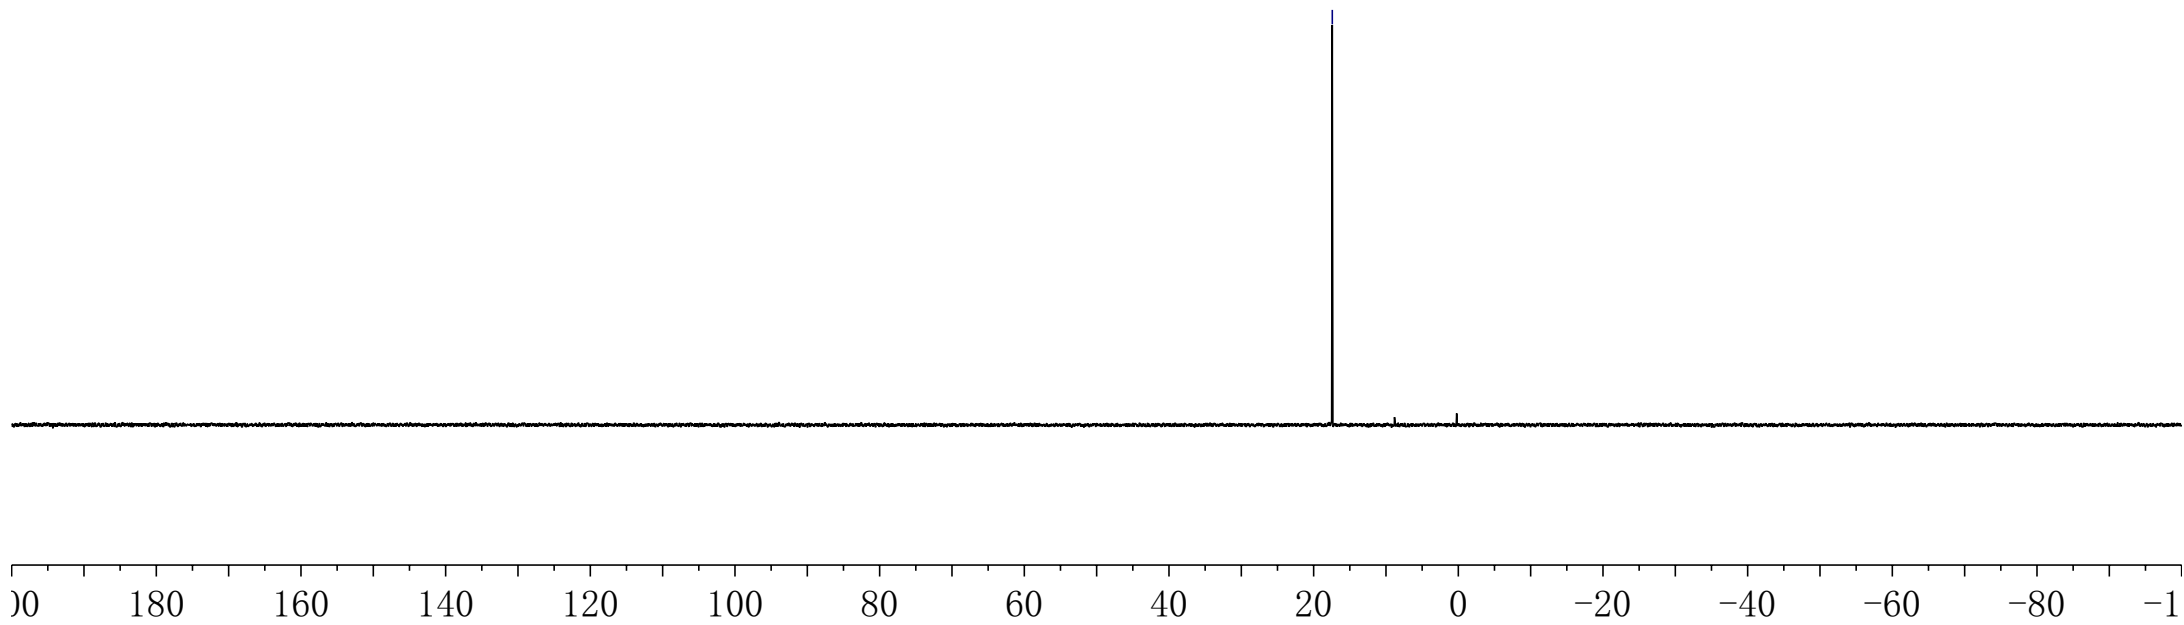

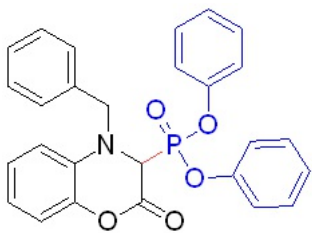

**3af**

—9.31

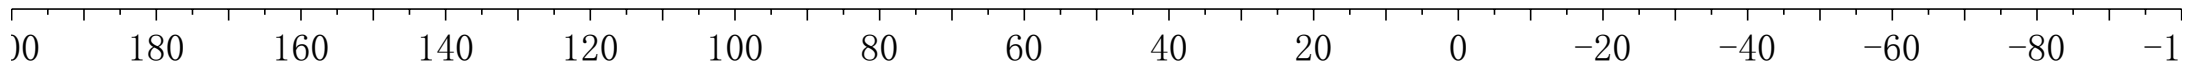

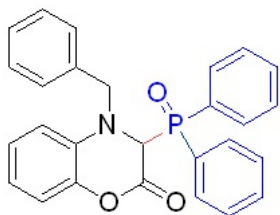

**3ag**

—30.03

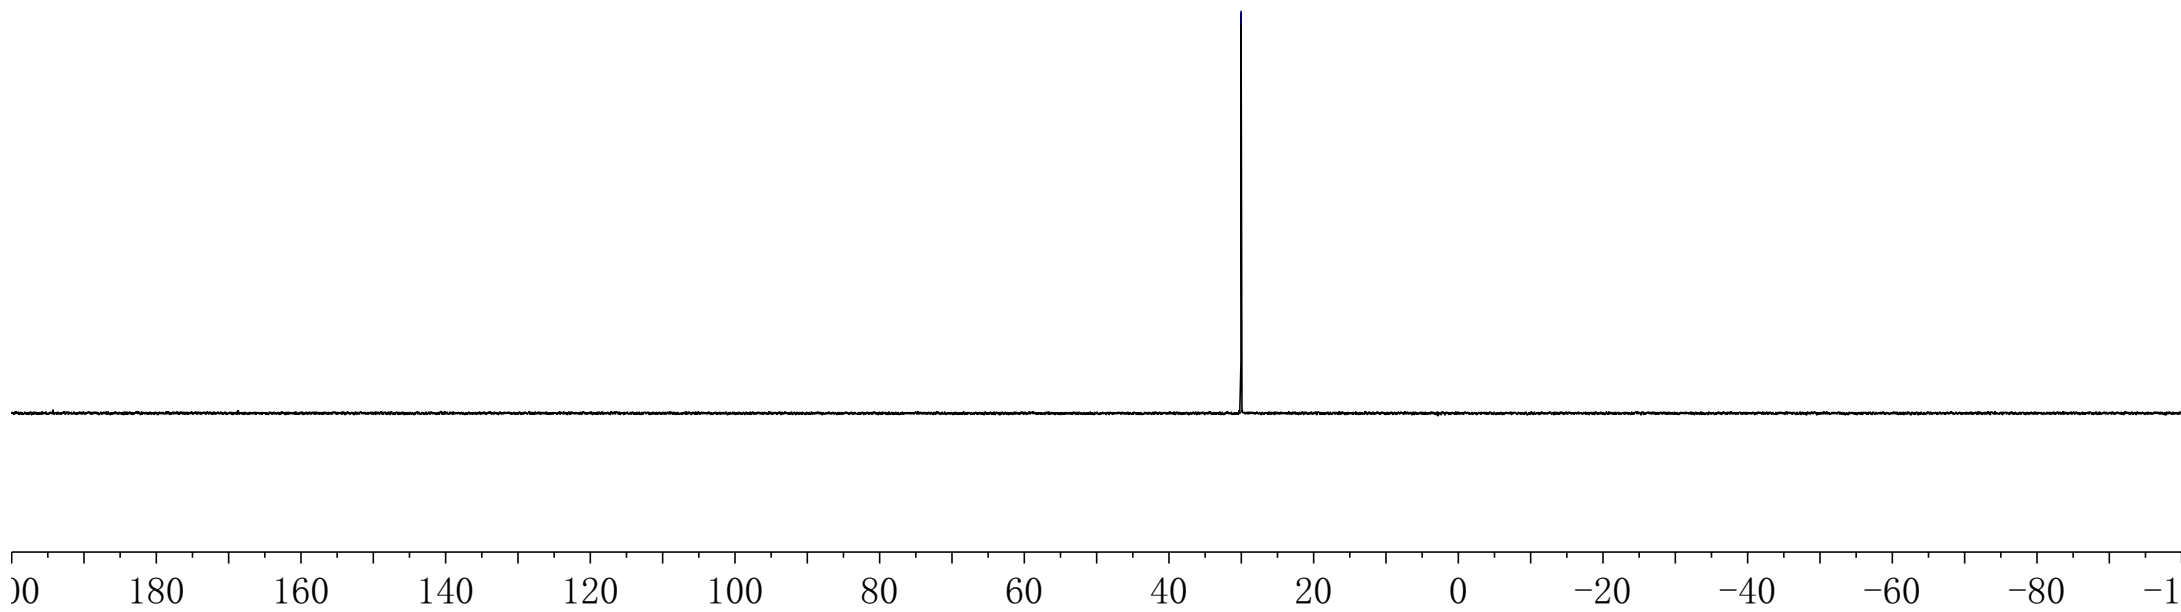

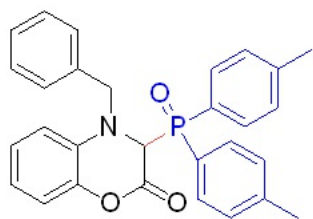

**3ah**

—30.72

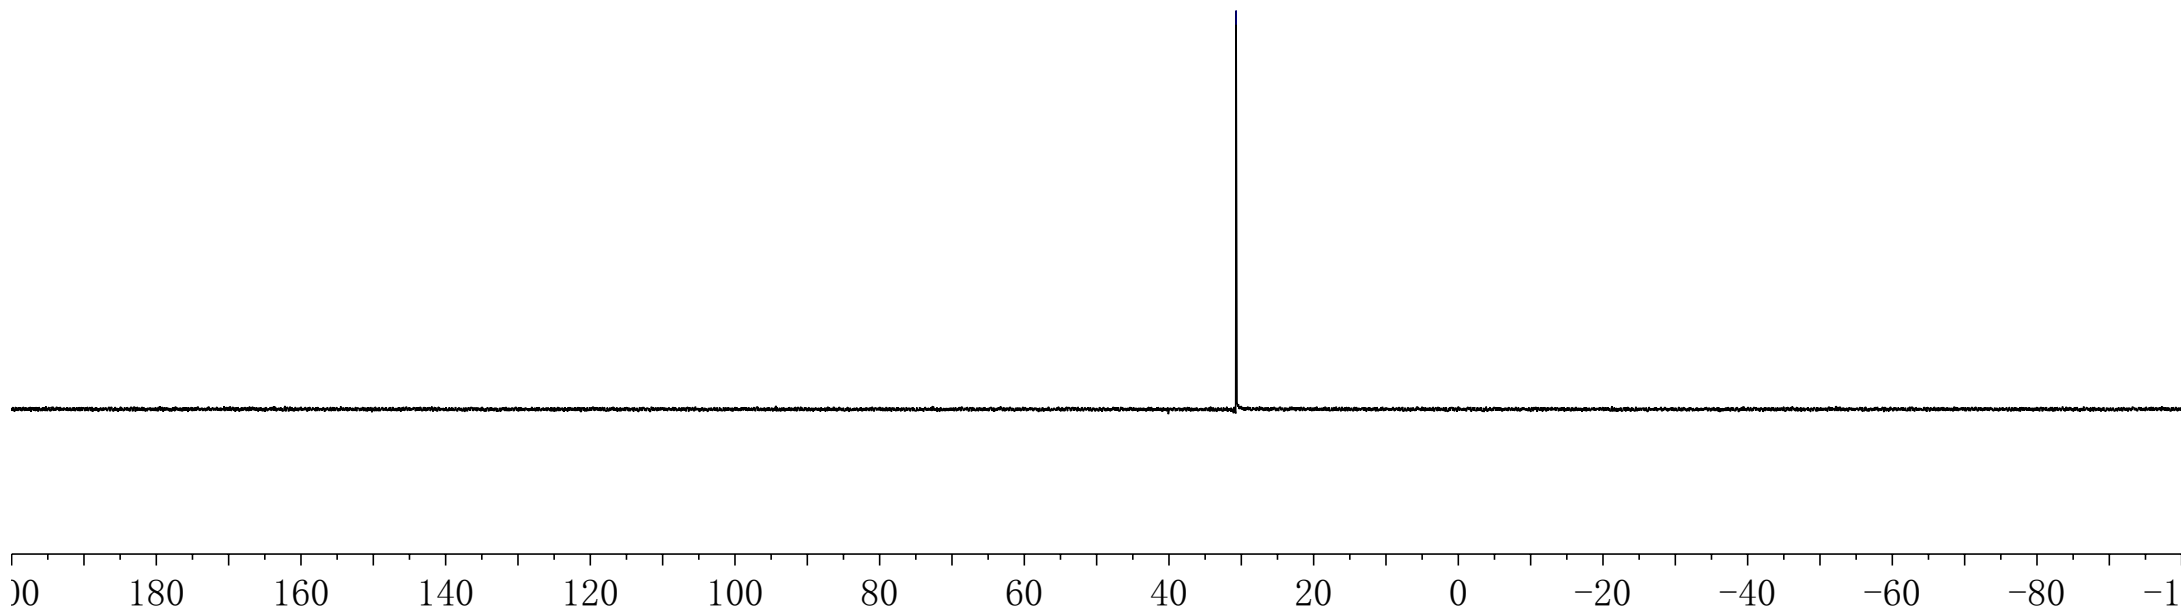

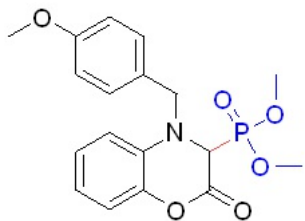

**3ba**

—19.42

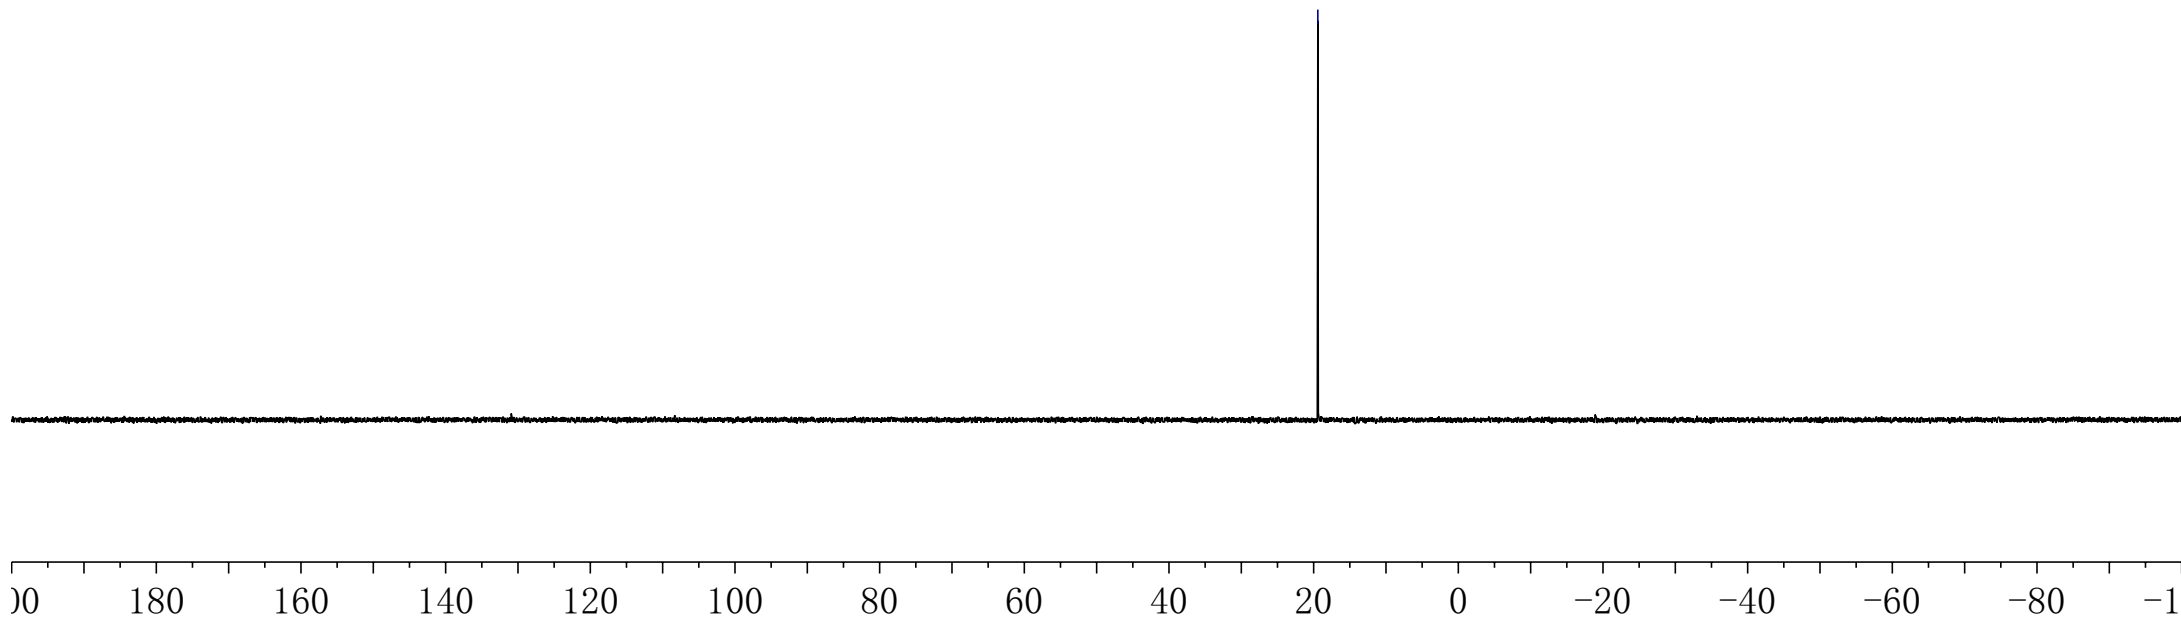

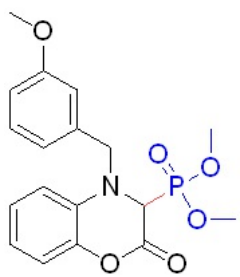

**3ca**

—19.23

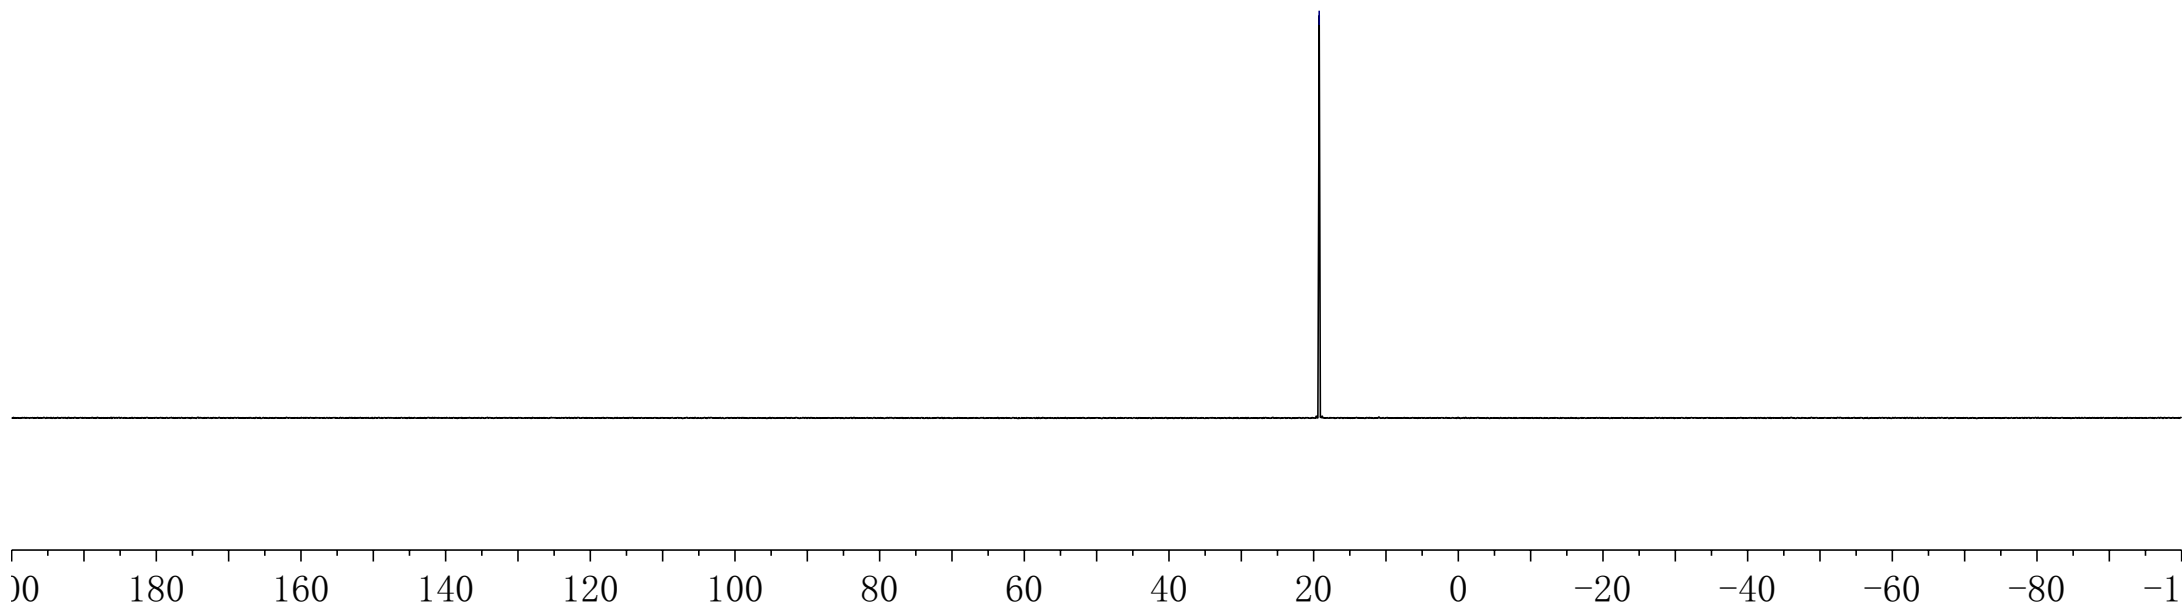

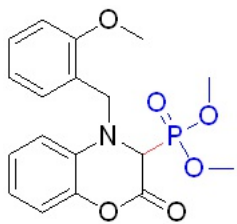

**3da**

—19.54

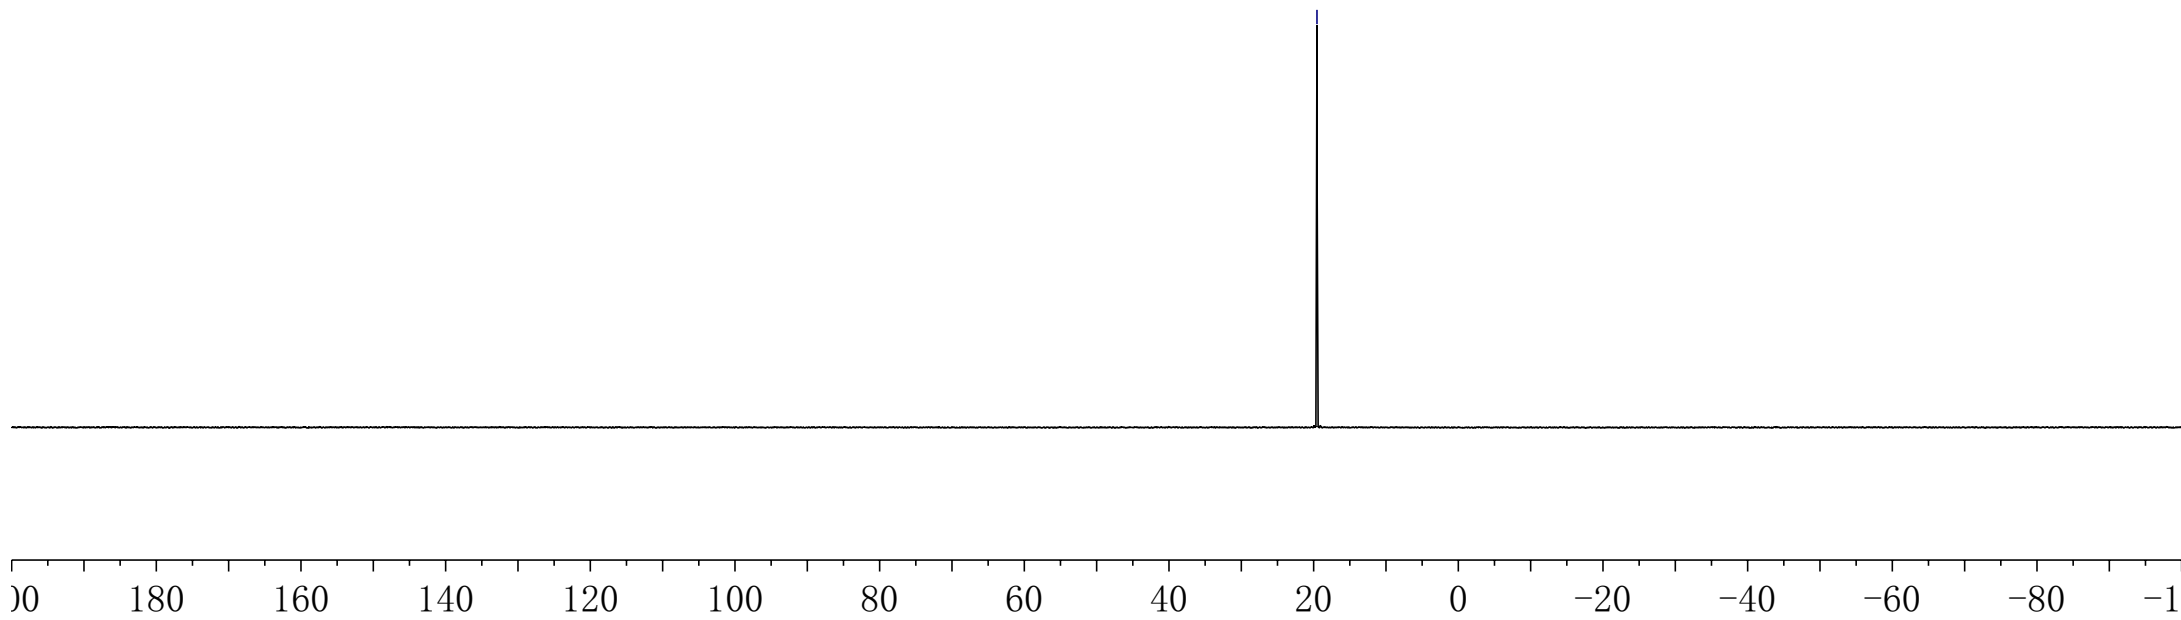



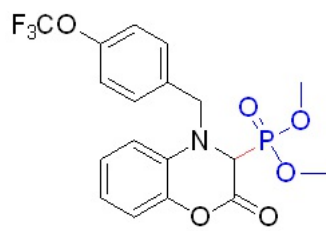

**3ea**

—14.66

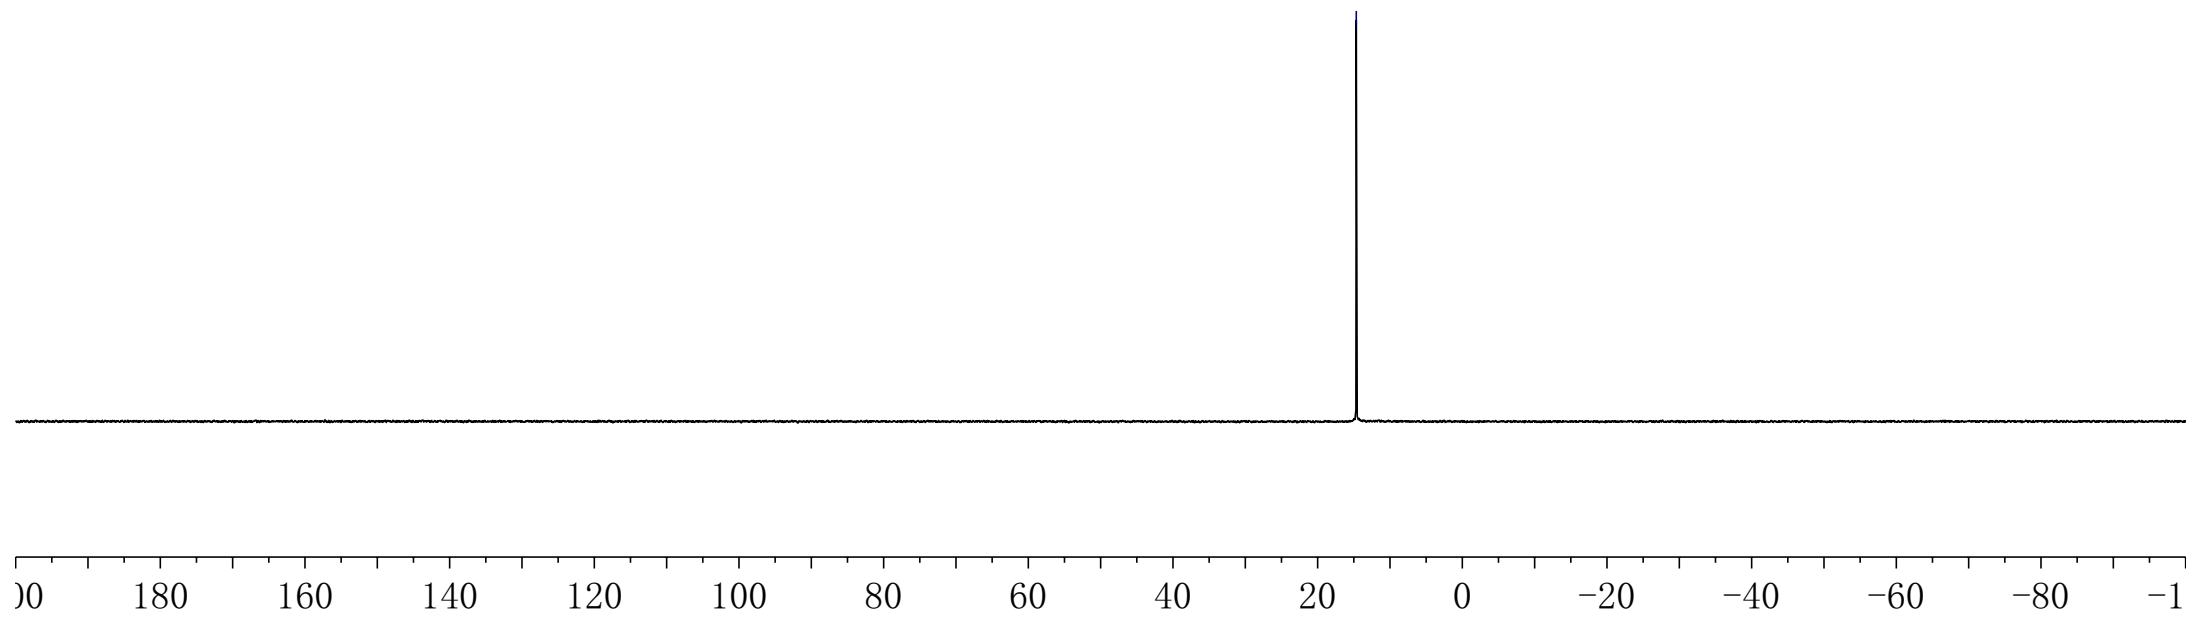

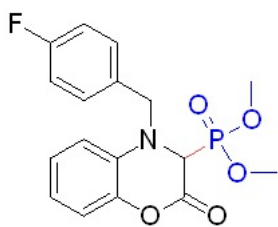

**3fa**

—14.37

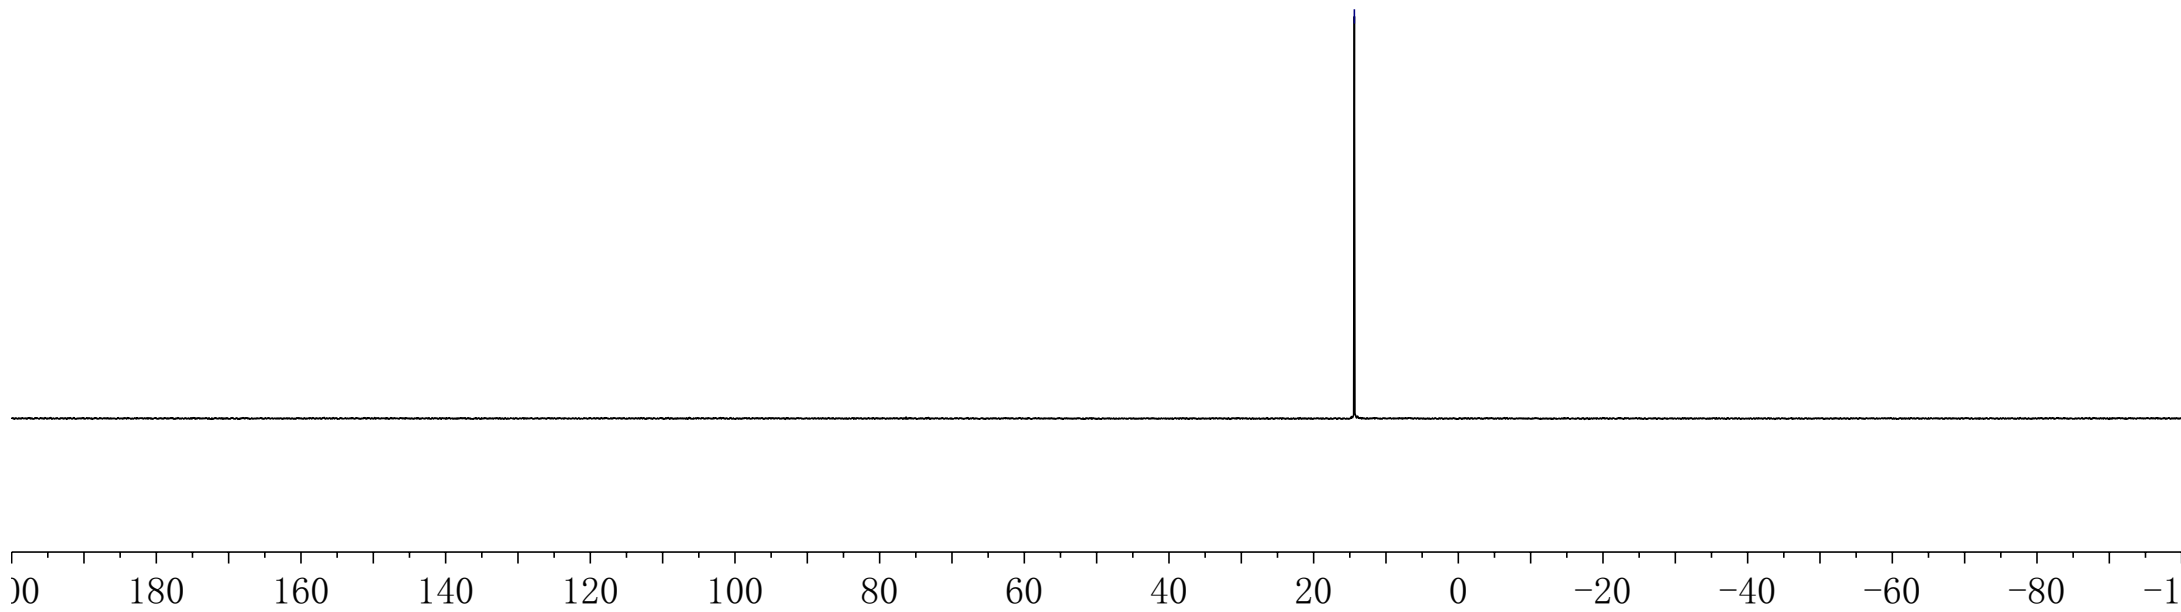

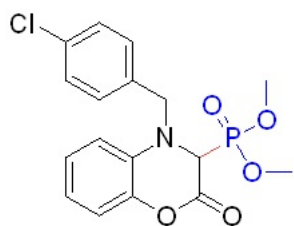

**3ga**

—19.02

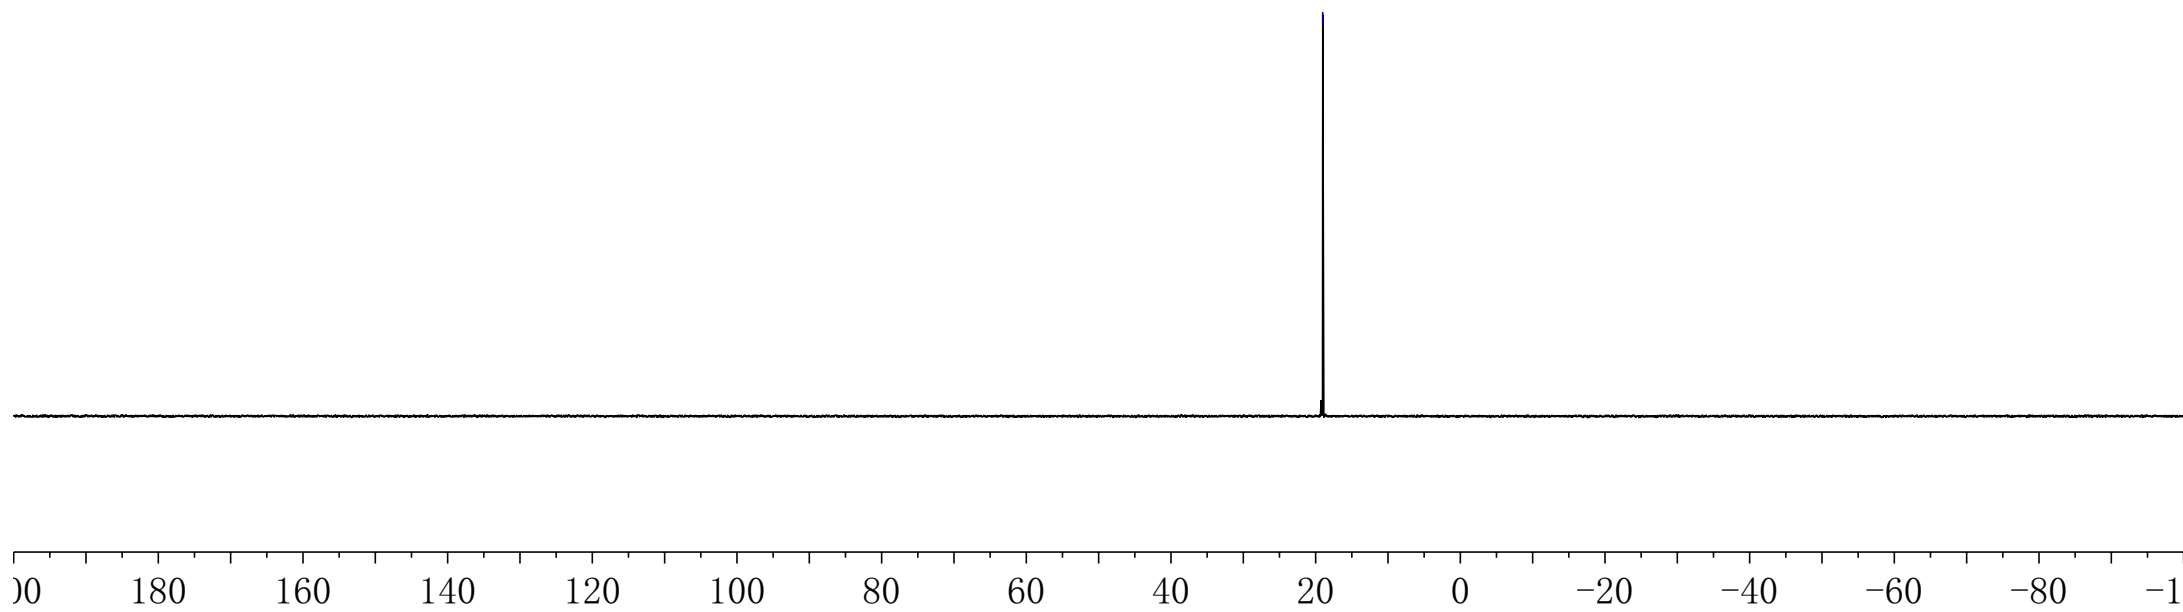

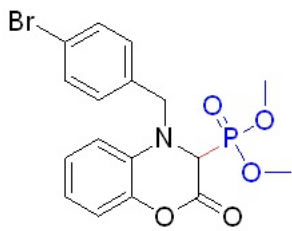

**3ha**

—14.27

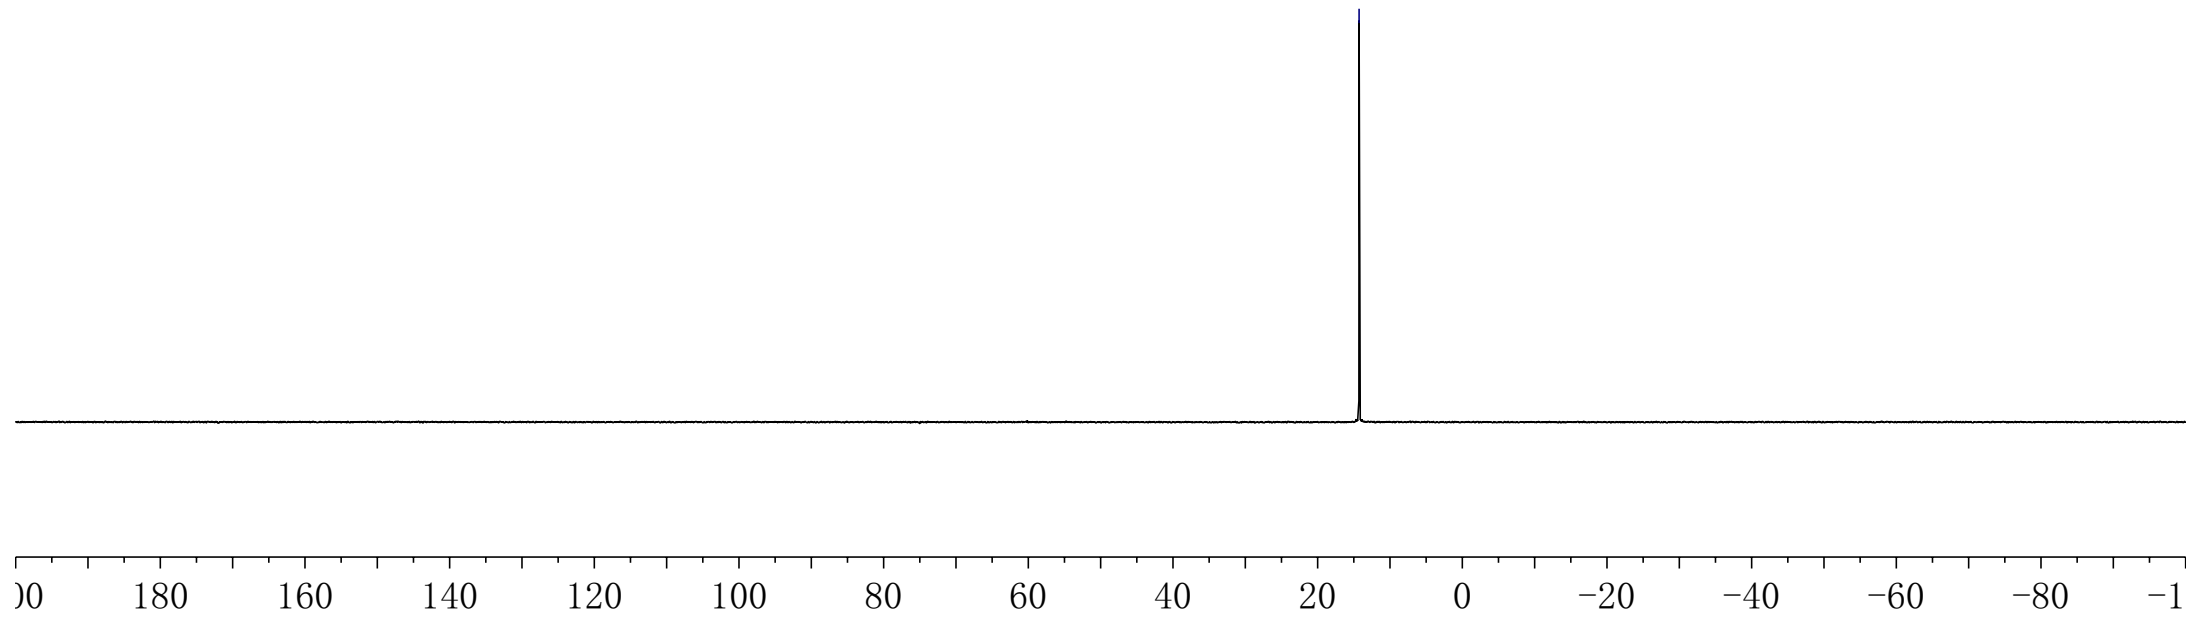

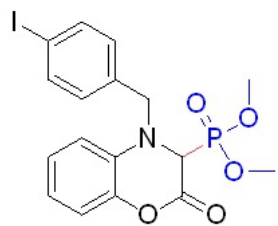

**3ia**

—13.82

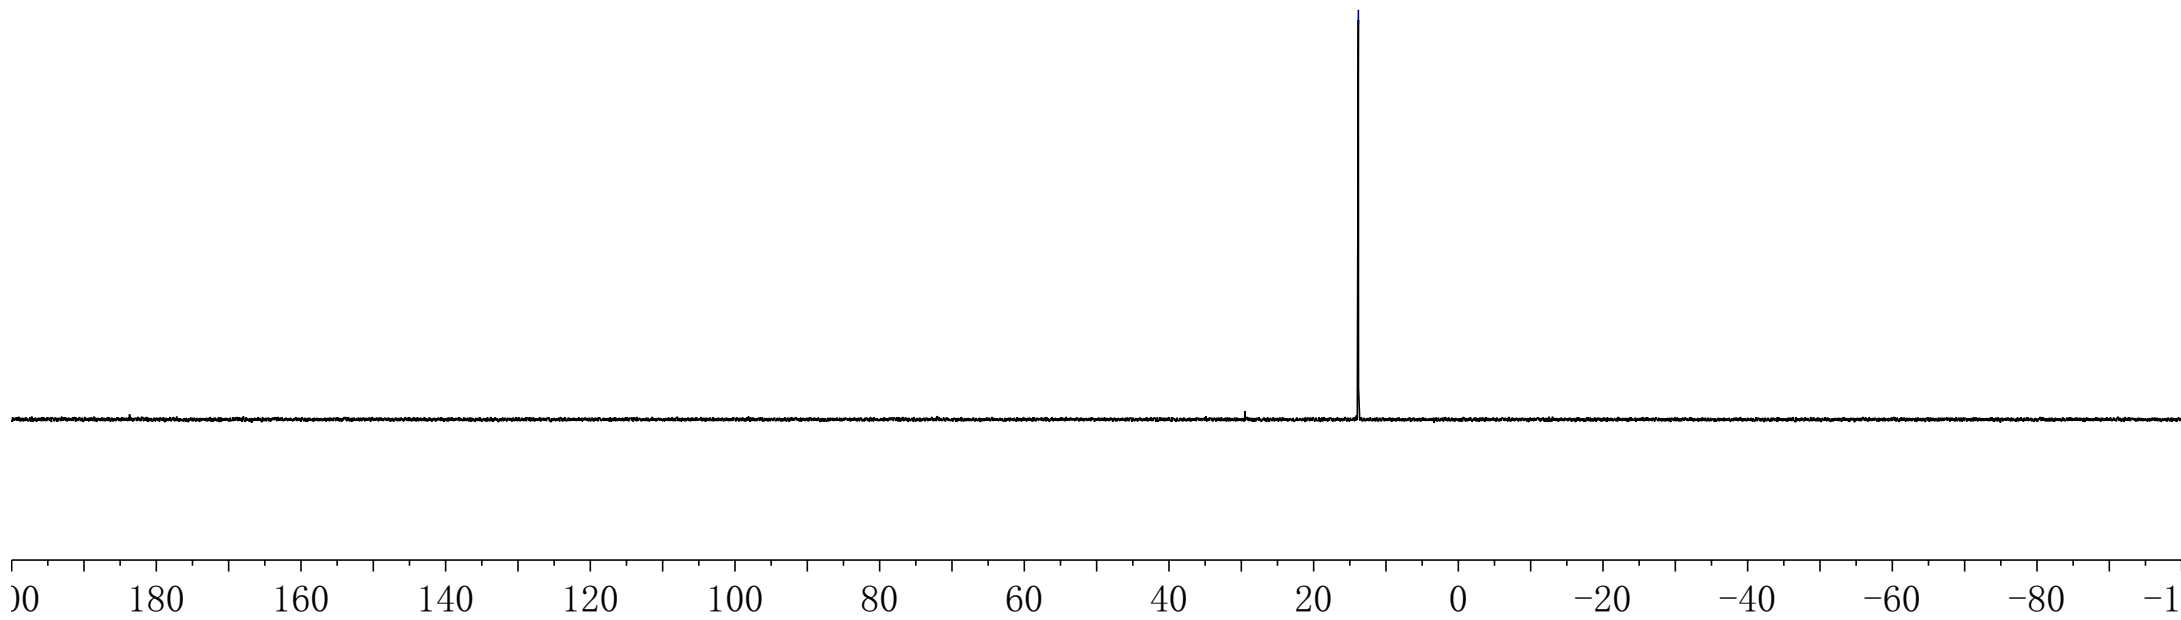

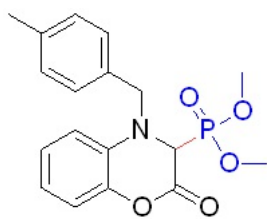

**3ja**

—19.42

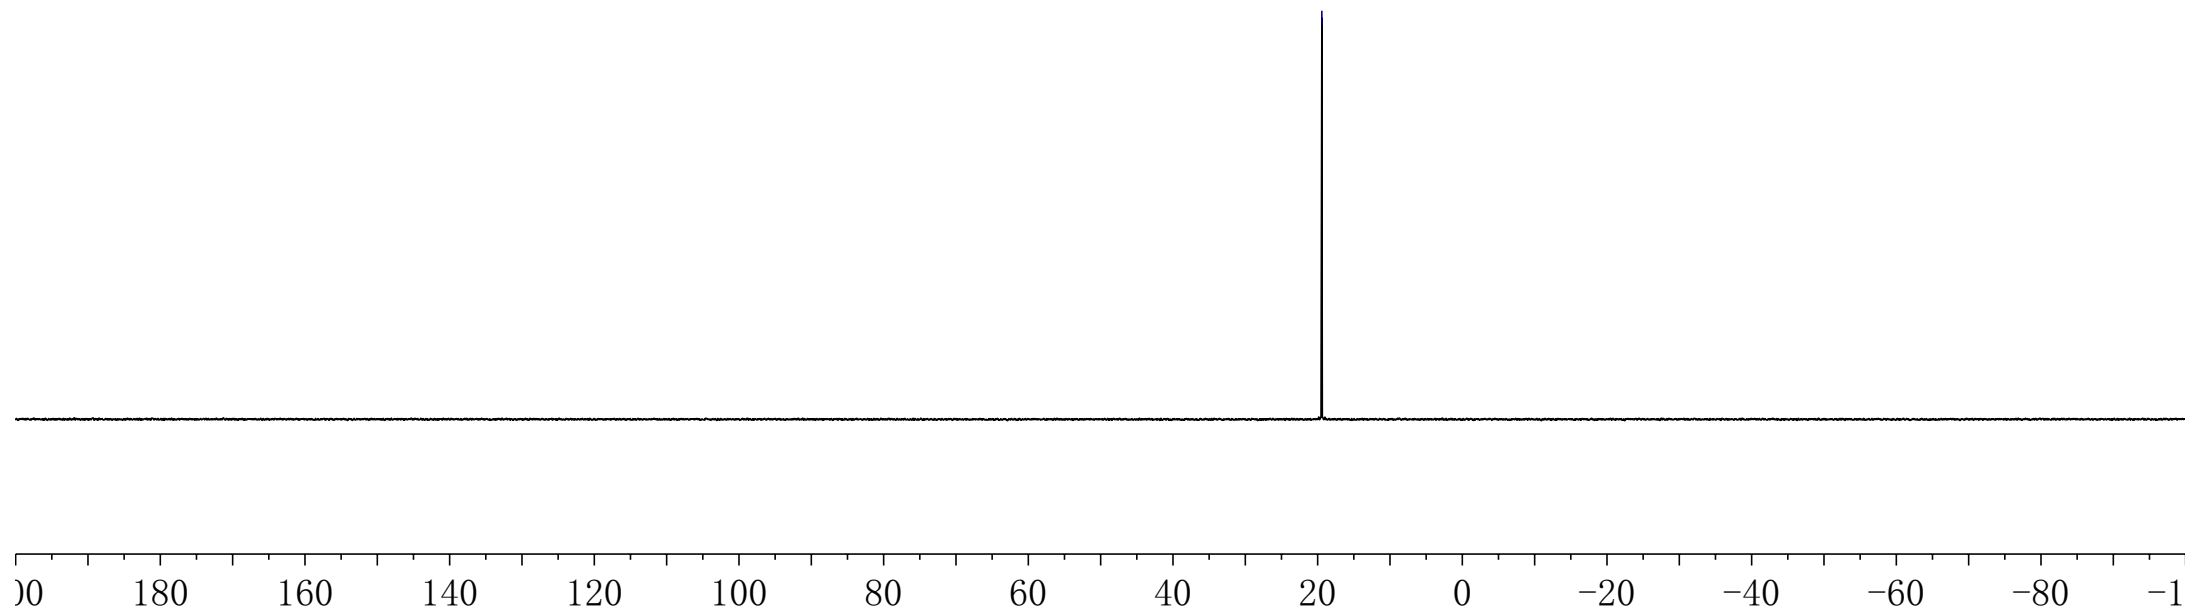

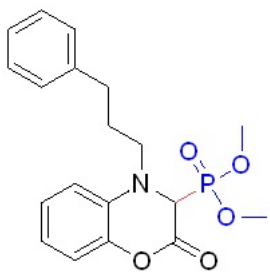

**3ka**

—19.11

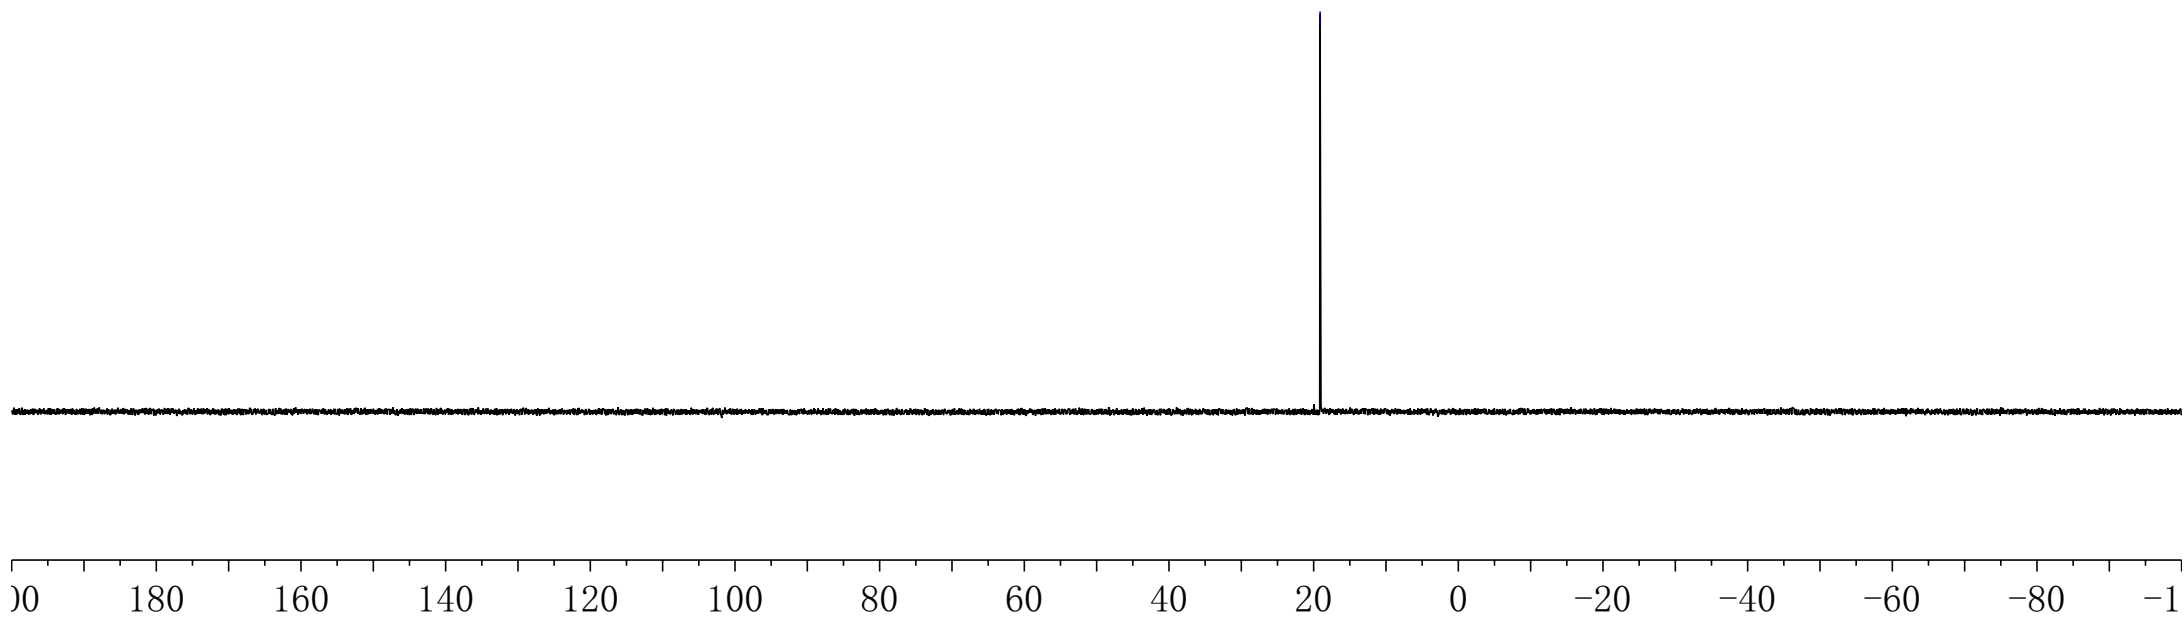

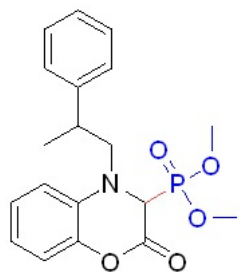

**3la**

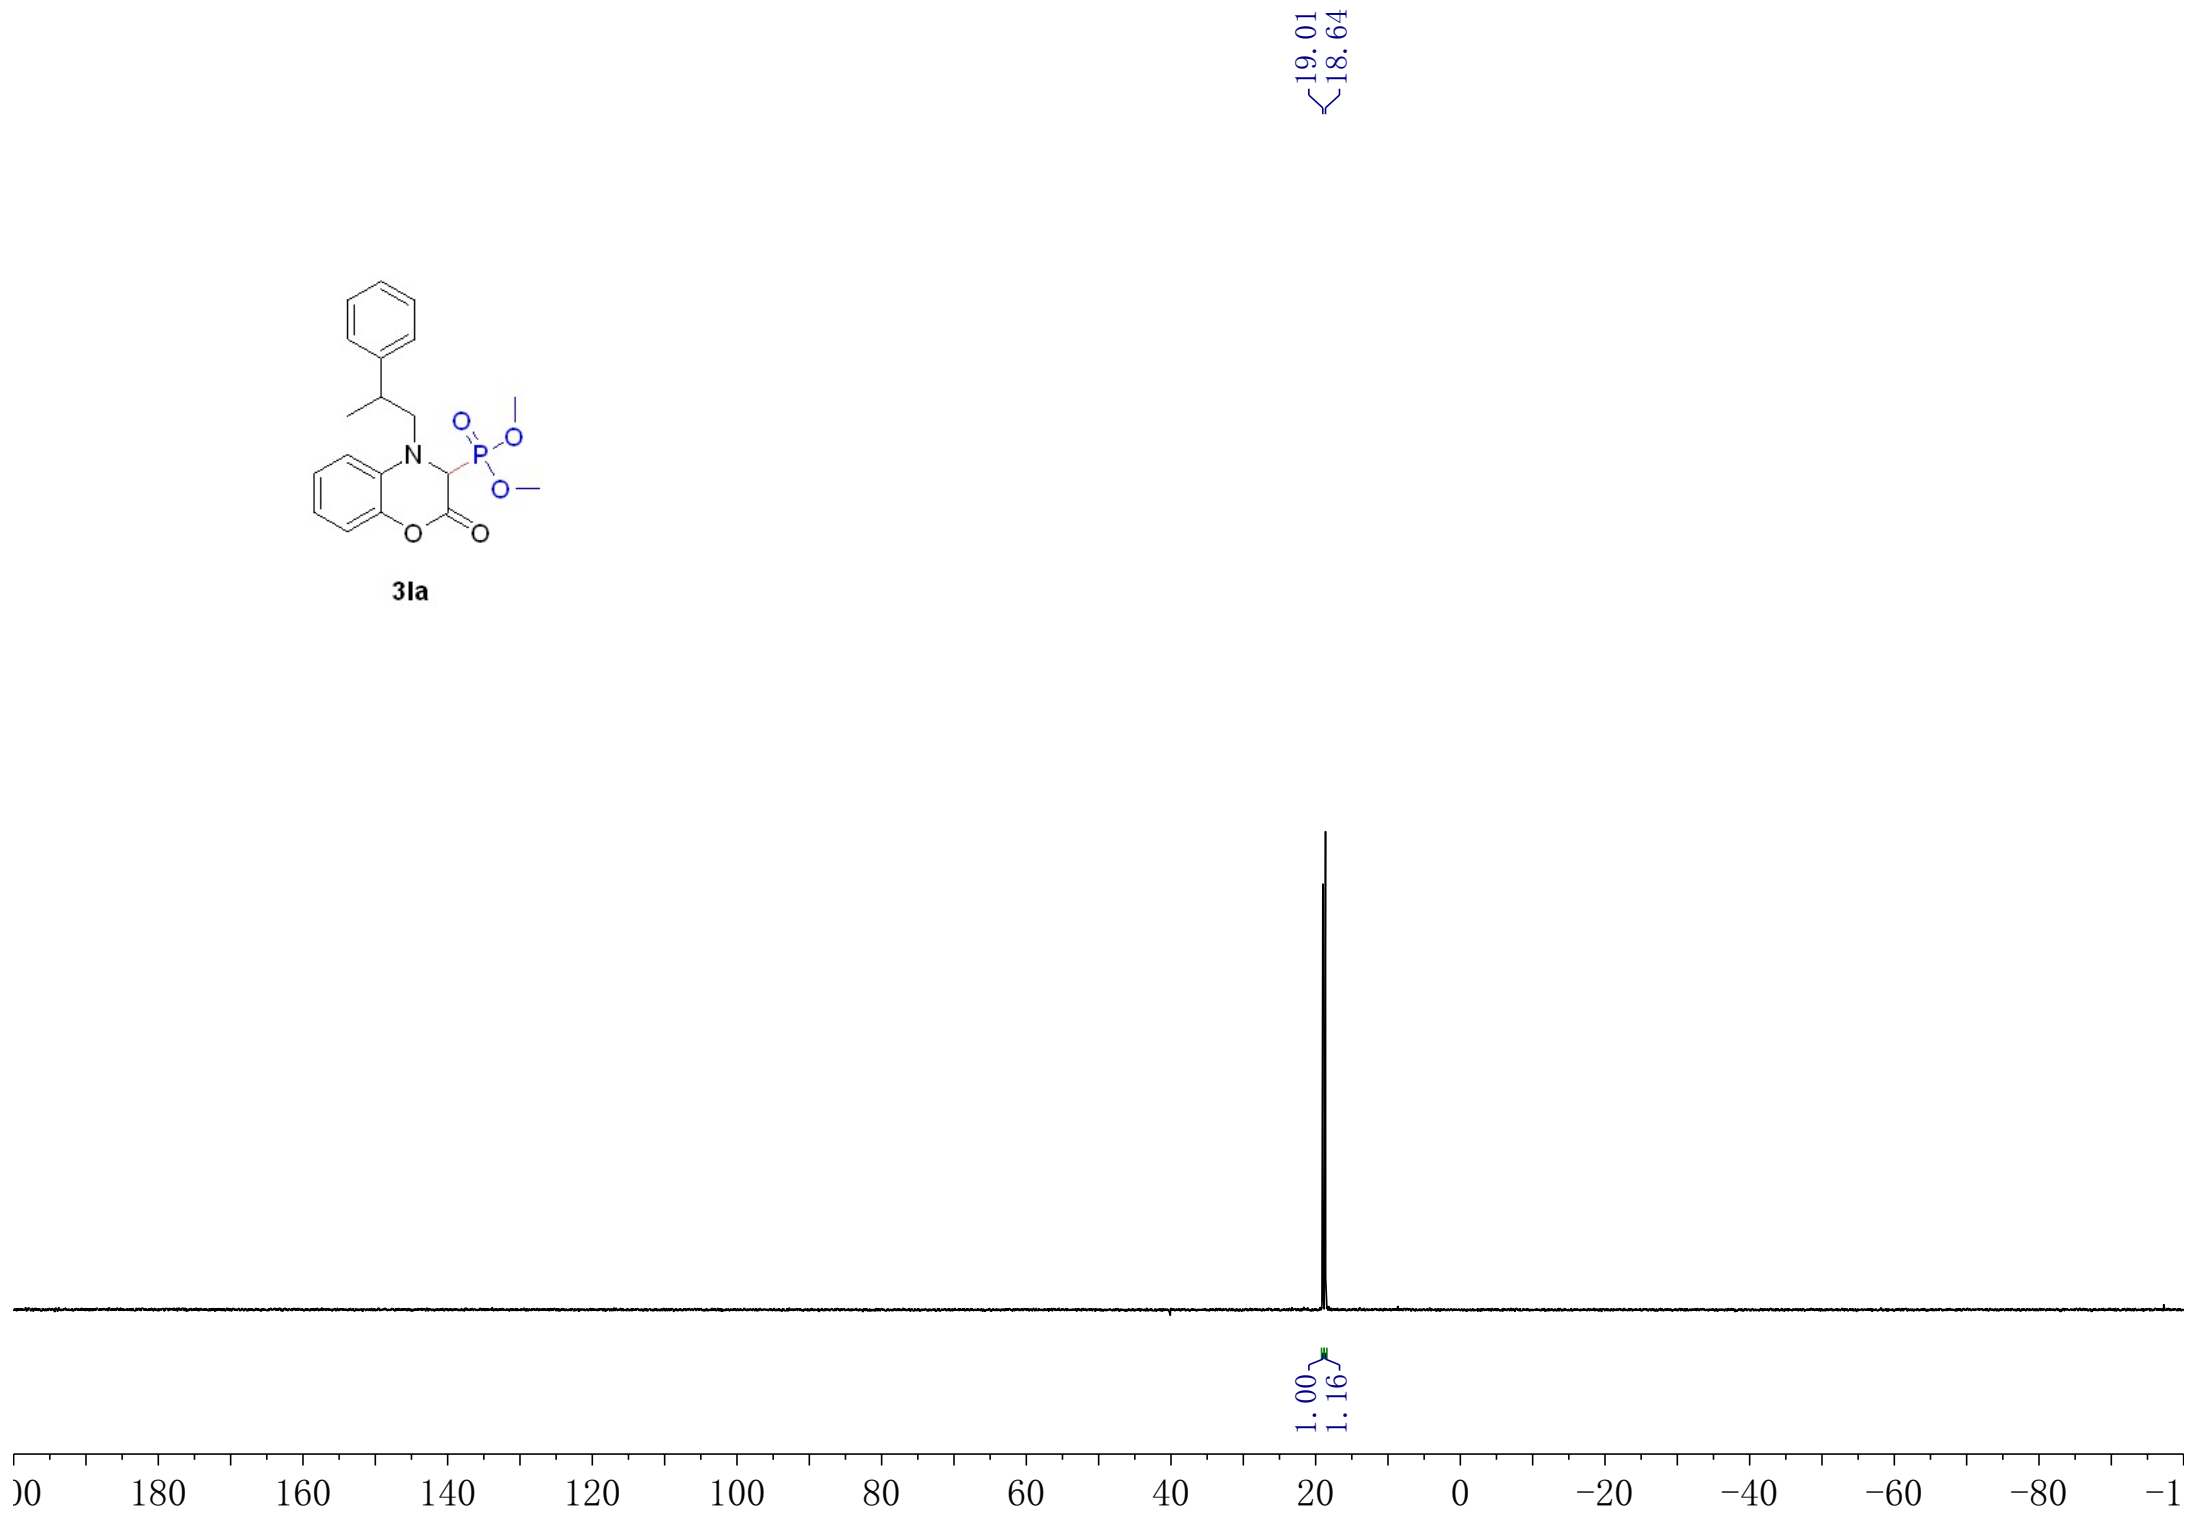



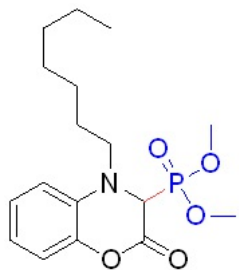

**3ma**

—19.17

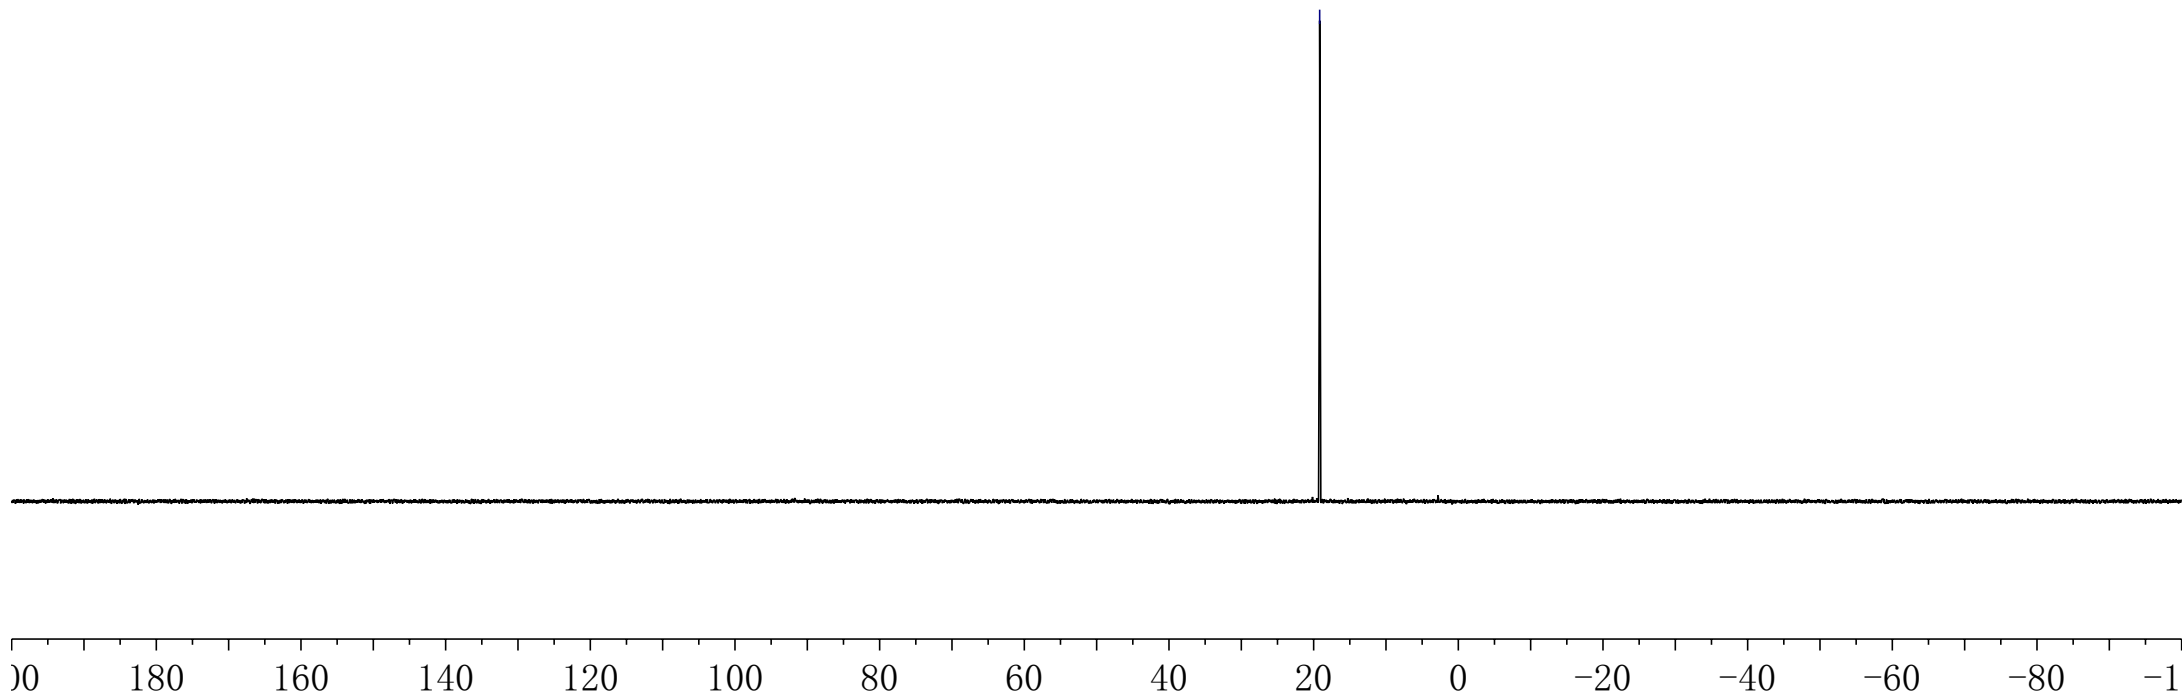





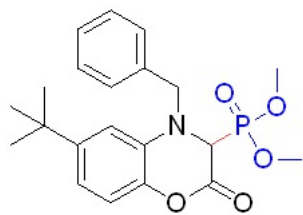

**3pa**

—19.47

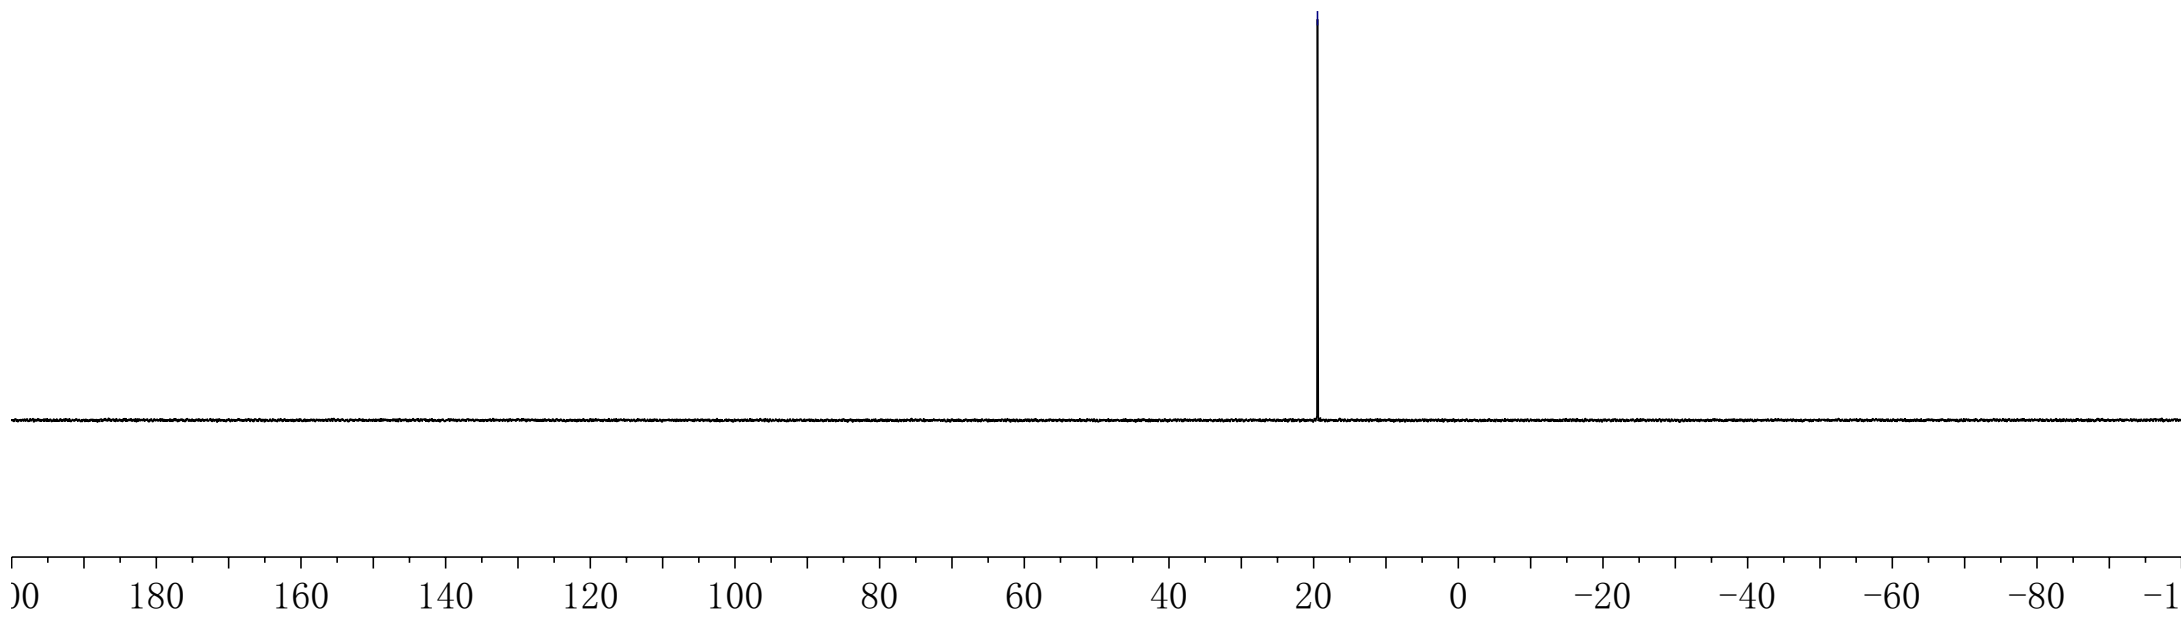

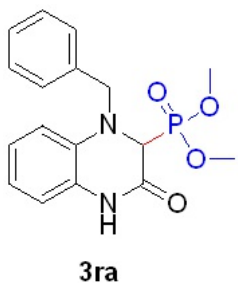

-21.98

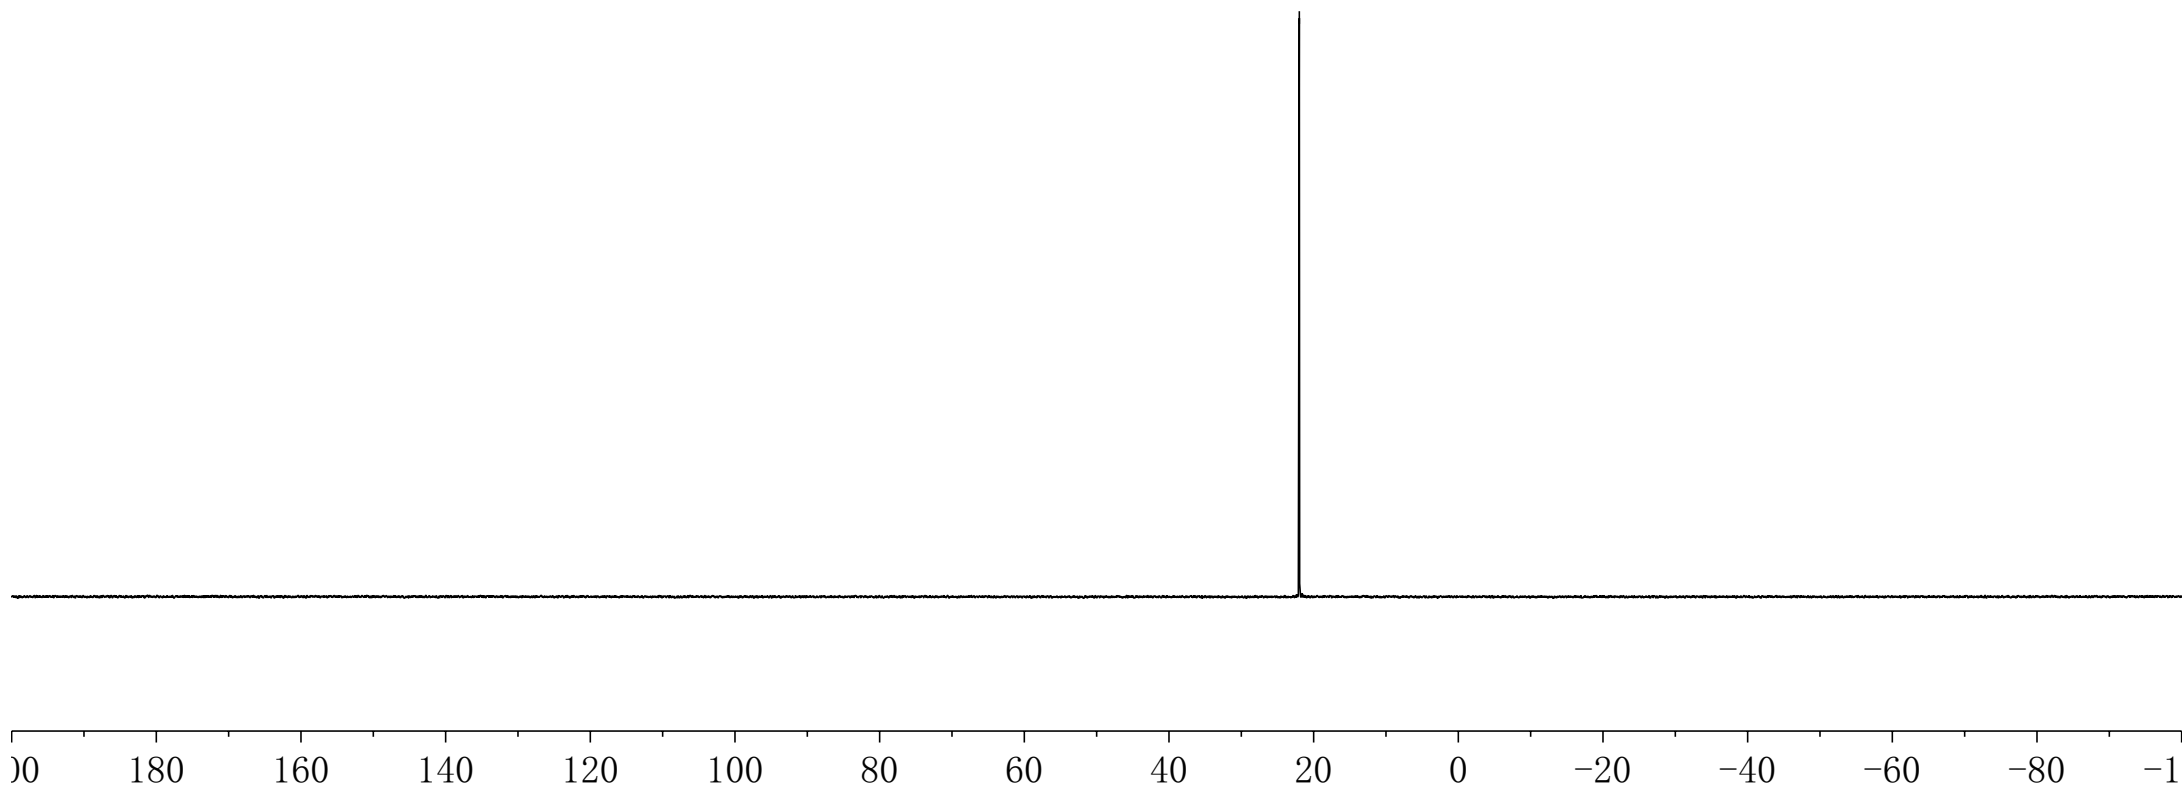

Supplement: c8qo01049h1.pdf [file c8qo01049h1.pdf]
